# Supplementary material for: Comparative Proteomics of Mulberry Leaves at Different Developmental Stages Identify Novel Proteins Function Related to Photosynthesis
Source: Front Plant Sci. 2021 Dec 24;12:797631. doi: 10.3389/fpls.2021.797631 (PMC8739898; doi:10.3389/fpls.2021.797631)
Supplement: Supplementary Table 1 — List of identified peptides in L1, L6, and L20 leaves. [file Table_1.XLSX]

## Sheet: Sheet1
Sequence	Length	Mass	Score	Intensity JY1-1	Intensity JY1-2	Intensity JY1-3	Intensity JY6-1	Intensity JY6-2	Intensity JY6-3	Intensity JY20-1	Intensity JY20-2	Intensity JY20-3
AAAAAAADVAK	11	928.498	82.645	7283900	10312000	14309000	3328500	3750100	5575000	12207000	11942000	6436600
AAAAAADTTEAA	12	1032.47	66.682	15200000	11898000	17550000	15376000	0	18520000	28247000	25159000	21766000
AAAAATLSPPDAEK	14	1311.67	132.91	21494000	23657000	16053000	11484000	34351000	80977000	0	0	12762000
AAAAEAVK	8	729.402	87.323	9468100	5381200	8617800	10538000	8253400	10438000	0	0	0
AAAAEEGFDR	10	1035.46	76.221	18524000	17194000	20630000	0	8543300	0	0	0	0
AAAAGFEK	8	763.386	86.833	399970000	288450000	411240000	1231000000	647050000	1305000000	2129200000	3015300000	1567900000
AAAASSWSNDGGSSVESSPR	20	1921.84	39.661	5663200	4662700	3163600	0	3848400	2953300	0	0	0
AAAATAAGK	9	730.397	107.9	11484000	107180000	10921000	9519700	3088200	9075200	41909000	76555000	2682000
AAAEEAVLR	9	928.498	100.19	0	1945000	0	0	0	12374000	27833000	25359000	15911000
AAAIGANNQAAQSMLK	16	1557.79	51.013	44174000	64301000	43397000	3344300	4807000	37816000	0	0	0
AAALNIVPTSTGAAK	15	1383.77	113.63	575800000	495040000	475790000	1464000000	843700000	1376600000	2565900000	3743000000	1355700000
AAANAPITMR	10	1014.53	52.867	2706800	3487100	3315400	0	0	0	0	0	0
AAAPTNEVR	9	927.477	55.531	12371000	13585000	18068000	0	0	3311100	0	0	0
AAAQEAAAR	9	857.436	76.774	29556000	28610000	24987000	0	5995200	7340800	0	0	0
AAASAPIAMR	10	957.507	107.66	49933000	47904000	46503000	16688000	16673000	40772000	48499000	49937000	0
AAASEAAAR	9	816.409	115.69	34289000	29092000	30696000	14040000	0	17411000	0	19111000	6601700
AAASSSSAQVFGNR	14	1351.65	43.282	2074200	3697700	0	0	0	2728600	0	0	0
AAATAGIPVINAGDGPGQHPTQALLDVYTIER	32	3215.66	21.023	0	0	0	0	0	0	4536300	10018000	3999600
AAATSNLKPVVLELGGK	17	1666.96	50.608	18792000	19556000	29501000	26856000	0	0	19949000	17224000	5322700
AAAVDADTGAPTIFDK	16	1561.76	86.028	20604000	19978000	14462000	19497000	40931000	0	33248000	40264000	17754000
AAAVSTLAK	9	830.486	71.379	37630000	37019000	19884000	10797000	16052000	24907000	0	0	0
AADALHQEER	10	1138.54	64.711	11897000	11051000	7536600	2846000	0	10088000	2793900	5011000	1606800
AADDGANVIGYFAWSLLDNFEWR	23	2629.22	26.13	0	10714000	4456200	0	0	0	0	0	0
AADEAVK	7	702.355	86.866	3103100	38059000	0	28866000	17568000	25304000	0	0	0
AADEIQDEDPNVSR	14	1557.69	56.404	2925400	3490300	2072900	0	0	0	0	0	0
AADKVEVESDAKK	13	1388.71	51.092	40465000	47605000	31413000	0	0	0	0	0	0
AADLQQGVAPFEEK	14	1501.74	186.81	20118000	18889000	7184200	18984000	40172000	177610000	40199000	42051000	11244000
AADLQQGVAPFEEKHR	16	1794.9	33.547	0	0	12359000	0	0	0	0	0	0
AADLTYWESAAR	12	1352.64	76.228	123460000	129260000	97459000	20509000	86487000	88538000	0	0	0
AADNIAANLYSVK	13	1348.7	124.67	0	0	126660000	86703000	182070000	238550000	29011000	37541000	22396000
AADPFAK	7	718.365	78.616	0	0	0	0	38255000	59256000	64946000	66489000	44007000
AADSSFWDDR	10	1168.48	57.59	0	0	0	0	0	0	0	3606400	0
AADVGADLVGK	11	1014.53	91.867	66316000	81446000	30226000	50436000	46096000	116660000	164530000	153700000	51993000
AADVGADLVGKVER	14	1398.75	85.837	28318000	38189000	36608000	17820000	46115000	20395000	76927000	97564000	50456000
AADVIAAANTAAEVALR	17	1625.87	130.02	141610000	157620000	126370000	32985000	0	0	5622700	18353000	7401100
AADVVTTIVQNNPR	14	1496.79	115.78	6984800	7252300	6267900	3705600	17372000	19557000	11193000	10772000	9678600
AAEAAAIGYK	10	963.503	83.206	2560100	1496300	0	0	0	1551800	0	0	4036300
AAEAELLIK	9	956.554	64.265	0	0	0	0	0	0	0	0	11671000
AAEAGFVNPK	10	1002.51	96.253	4282400	4804500	2456800	0	0	0	0	0	0
AAEDANVYHDLVR	13	1471.71	120.06	48206000	59017000	47740000	22985000	78306000	94683000	79745000	94713000	33864000
AAEDPEFETFYTK	13	1546.68	133.91	1783600000	1243700000	1641500000	4936500000	3522700000	5136900000	2231800000	2532900000	1305600000
AAEEAVEK	8	845.413	98.997	0	0	0	6712000	4190400	7581700	0	0	0
AAEEGAAPPAATK	13	1182.59	82.803	4730000	5416900	6264100	13464000	19819000	0	37753000	0	0
AAEEGAAPPAATKPAPEGEAPK	22	2059.02	53.779	47479000	21760000	54062000	68014000	81766000	106530000	124600000	146130000	62635000
AAEEKLGSQLDIIAPIKY	18	1958.07	56.327	0	0	48218000	0	0	0	0	0	0
AAEEVIFGEPEVTTGAAGDLQQITGLAK	28	2814.43	151.66	0	130580000	246320000	153920000	0	0	469540000	194240000	250640000
AAEIFSNK	8	878.45	127.12	91809000	86971000	70632000	186220000	124310000	228980000	349060000	323570000	156730000
AAEIFSNKK	9	1006.54	121.85	163340000	193750000	201580000	382730000	551210000	412780000	1667300000	2388800000	668690000
AAELAYFLR	9	1052.57	194.27	44952000	33077000	26471000	39554000	35101000	35529000	11999000	0	6473900
AAELETEVAR	10	1087.55	99.442	6299500	7733400	0	1836100	4695700	2346300	0	0	0
AAELLVDFFEK	11	1280.67	88.681	0	0	0	0	0	0	0	0	0
AAELTTLLESR	11	1202.65	150.27	621880000	573040000	451940000	395890000	619910000	0	145690000	164040000	105800000
AAENFQALGEAYQVLSDPEKR	21	2335.14	34.221	0	0	0	0	0	0	19399000	16772000	7804900
AAENVYIQK	9	1034.54	68.422	20134000	10986000	12698000	4702800	7484400	8249300	27028000	16483000	17419000
AAEPFKNEALQLR	13	1485.79	51.463	12466000	14654000	13188000	6260800	0	0	0	0	0
AAEQIHIPR	9	1033.57	67.169	5774200	6071100	7002400	2632500	6870500	11251000	9729000	10424000	4794600
AAEQSLNQFQYTPQHLVR	18	2129.07	31.111	42214000	45712000	0	0	0	0	0	0	0
AAESSDEATK	10	1007.44	115.71	24981000	18190000	1468700	10685000	0	0	0	0	7216500
AAETAESALQAER	13	1345.65	42.21	0	0	0	0	0	0	10330000	11484000	0
AAETHGKDIVR	11	1195.63	39.179	3655600	2937400	9517000	3610900	0	0	0	0	0
AAEVDVSK	8	817.418	85.212	740670000	78320000	27352000	37440000	25434000	0	71249000	0	0
AAEVIGADGGLLK	13	1212.67	86.624	4797300	0	4765000	4833800	24143000	33759000	14012000	16313000	7750800
AAEYFALSR	9	1026.51	91.853	5283200	6921500	3648700	0	0	18082000	0	0	0
AAFDEAEK	8	879.397	104.37	154420000	211170000	119650000	20794000	80849000	121990000	43823000	42938000	18218000
AAFGAEEAGR	10	977.457	75.043	110300000	172450000	105730000	20464000	24284000	40129000	0	0	0
AAFNNPER	8	917.436	63.306	8525400	13068000	12134000	3883900	0	0	0	0	0
AAFPSYAEFGNTGLER	16	1728.81	63.76	0	0	0	0	25597000	0	7372800	11492000	5302900
AAGAEETPR	9	900.43	43.124	5365700	3324100	5271400	4859600	7884300	8492200	0	0	0
AAGAELLADGR	11	1042.54	49.418	3355800	3083500	0	997860	1593200	0	0	0	0
AAGAGADLLDAAAQYGK	17	1561.77	205.49	553910000	393380000	475760000	510050000	0	748860000	320730000	303830000	109060000
AAGAPATARP	10	881.472	87.323	88267000	117960000	107450000	29386000	35028000	88973000	127310000	133040000	39150000
AAGAPKPDVETAIEALNALK	20	1978.07	127.59	107100000	128210000	70715000	98836000	0	0	46331000	63680000	21680000
AAGATWVQFDEPTLVK	16	1731.88	167.11	469330000	422990000	287100000	103340000	0	0	63714000	59837000	20894000
AAGEVGQK	8	758.392	81.784	0	12166000	11297000	0	6261100	13314000	0	0	0
AAGEVLALQK	10	998.576	103.74	5293500	7398400	7052500	4491000	5621300	9207700	29218000	28979000	6485200
AAGGFGGIK	9	776.418	79.116	7782700	8869600	9482800	0	12660000	18721000	15506000	17766000	0
AAGGFGGLR	9	804.424	124.37	98218000	113960000	92467000	30710000	66466000	106570000	47964000	0	26296000
AAGGIASGSR	10	845.436	85.676	0	0	0	0	7033800	5569000	0	0	0
AAGGREEEEEFVYR	14	1640.74	33.961	4839400	3093400	4104700	0	0	0	0	0	0
AAGITGIEIGTK	12	1129.63	73.499	0	0	0	0	14107000	0	0	0	0
AAGITSIGVK	10	915.539	76.679	44751000	50244000	39808000	18941000	24604000	34646000	37222000	38295000	26366000
AAGMTCIVTK	10	1050.52	47.198	0	0	0	0	0	0	8615100	4270200	2087700
AAGRLPGYGMTTNIINGGLECGGQGPDDRVENR	33	3444.63	83.022	0	0	1423400000	0	0	0	0	0	0
AAGVFEEDGFAAER	14	1467.66	63.408	0	0	0	0	0	0	6279200	0	3226100
AAGVILQMIK	10	1042.62	73.324	0	0	0	0	0	0	8808600	10562000	0
AAGVLDNFAEGEK	13	1319.64	78.655	0	0	0	0	0	0	10491000	11180000	0
AAGVLDNFAEGEKYSEHFLR	20	2252.09	72.644	75660000	100650000	72616000	21871000	1642700	0	10466000	12517000	1822800
AAGVPIVIAINK	12	1164.72	49.715	0	0	0	0	0	0	6527100	8859600	2881600
AAGVPYEVHIYPGNAHAFMNR	21	2313.11	29.136	193240000	258130000	198480000	44001000	0	0	0	0	0
AAGYDVESSASGDAILK	17	1652.79	85.845	5305100	8418700	3822700	0	0	0	10226000	11890000	3709100
AAHFEESMK	9	1048.46	49.715	0	0	0	0	0	0	25282000	50341000	17273000
AAHLALK	7	722.444	91.093	16041000	18408000	26537000	13199000	11715000	0	0	0	0
AAHLVDSTNQVGHFQK	16	1750.88	28.089	15583000	9627700	6662800	17679000	0	28785000	35313000	22514000	6892400
AAHPDWSPSAIK	12	1278.64	28.903	7369200	10877000	8258100	0	0	0	0	0	0
AAHPEWSPAAIK	12	1276.66	60.255	0	4484600	0	0	0	13077000	20829000	13992000	9905000
AAHVYSEAK	9	974.482	55.531	0	0	0	0	0	0	21867000	31334000	5514100
AAIDSNSQVGAIFQGLHTR	19	1984.01	71.872	0	0	0	23623000	38199000	74599000	43226000	40729000	17679000
AAIESAQGK	9	873.456	95.531	33686000	34004000	12756000	7166000	0	13042000	0	0	0
AAIFQSYIK	9	1039.57	83.313	109180000	81489000	38097000	80607000	63234000	175630000	32882000	52756000	10040000
AAIIALDGSDVGGR	14	1313.69	93.096	8434100	12902000	8598800	6883100	22379000	0	0	0	0
AAIKGESEGK	10	988.519	86.833	308720000	305240000	364870000	1671600	1461300	265510000	565280000	531590000	218210000
AAINQLTK	8	857.497	64.207	1346500	0	1129600	4006900	3087500	3620300	0	0	4583800
AAIQGNSFQK	10	1062.55	42.599	7158600	10415000	5591100	0	4512700	8290200	0	0	2024100
AAIQPAPEHSNNSR	14	1490.72	31.827	22413000	24438000	12492000	0	0	0	0	0	0
AAIQTAEEFVASQNRPK	17	1858.95	28.166	0	0	0	0	0	0	8879300	7599500	4133800
AAISTVDVLTPK	12	1213.69	84.17	10983000	12571000	8064700	9854900	61478000	0	28447000	32550000	11334000
AAITADPSGK	10	929.482	67.507	43205000	0	979550	0	31656000	33618000	0	0	0
AAIVEHETK	9	996.524	71.877	0	0	0	0	0	0	9006200	11153000	0
AAIVNSQTLEEVAR	14	1499.79	154.84	65583000	66513000	50912000	0	20129000	0	11128000	0	4861300
AALAEFISTLIFVFAGSGSGIAFNK	25	2530.35	140.17	2958400	25215000	0	6372000	0	5793600	10973000	8378300	0
AALALLER	8	855.518	72.492	14387000	12613000	10034000	13587000	1943800	0	0	0	0
AALANLAR	8	798.471	109.7	11438000	6307900	10400000	19046000	27417000	38241000	47956000	56764000	22768000
AALDAEGFHHVSIMSYTAK	19	2046.98	96.487	195700000	179960000	136240000	34655000	0	0	14971000	19792000	0
AALHEPYLGIFNSWTGTDCCK	21	2439.1	28.412	0	0	0	0	0	0	0	0	0
AALHSLTDSLR	11	1182.64	45.077	3755100	4120900	3484400	0	0	0	0	0	0
AALLAFK	7	732.453	94.669	52838000	40996000	40720000	19335000	0	81753000	34641000	22530000	13292000
AALLALR	7	726.475	126.05	10981000	13567000	12479000	1957900	0	6318300	0	0	0
AALLFVR	7	788.491	77.72	4423900	3521800	1793500	0	0	0	0	0	0
AALLGFK	7	718.438	77.72	3766600	3872000	1488400	0	0	0	0	0	0
AALNLASYGSSHSLK	15	1517.78	51.03	3992100	6995300	5127500	7935100	0	41269000	0	0	0
AALNLAYQK	9	990.55	101.69	0	0	0	0	0	0	17082000	19917000	7688400
AALNLLLPYQR	11	1270.74	157.58	0	0	0	24842000	0	0	27517000	33833000	8762900
AALPVGTVSGAPK	13	1166.67	40.496	12730000	11710000	12602000	8768200	5546500	0	24849000	0	0
AALQAGIDK	9	885.492	101.54	140030000	151080000	32215000	84136000	0	117830000	0	0	65550000
AALQAGIDKLTDAVGLTLGPR	21	2079.17	362.23	1562000000	2120200000	1020200000	1666000000	378970000	0	813650000	1095600000	32499000
AALQEAYSTPIIPLDVLADRPPEK	24	2606.4	116.24	323470000	295230000	312340000	57809000	0	0	38514000	37434000	25675000
AALQEAYSTPIIPLDVLADRPPEKK	25	2734.49	77.19	68868000	80815000	59554000	16336000	0	0	6606000	7553500	2744000
AALQFIDAGGR	11	1117.59	46.462	0	0	0	7452400	0	0	0	0	3839100
AALQYLESLR	10	1162.63	169.12	0	0	155510000	10000000	0	0	20696000	19421000	0
AALSDEYFVK	10	1141.57	49.715	12426000	10791000	6835800	0	0	0	0	0	0
AALSDEYFVKR	11	1297.67	29.341	1421600	2011400	4049200	0	0	0	0	0	0
AALTAAR	7	672.392	132.94	54710000	51761000	39545000	0	7097500	14306000	0	0	0
AALVADEIAK	10	999.56	66.692	0	0	0	8684300	0	7931700	37612000	40808000	11427000
AALVDPVK	8	811.48	75.189	21734000	25477000	13559000	0	12723000	5236600	0	0	0
AAMEMQAEAER	11	1235.53	80.231	7183500	10188000	7534400	2727000	0	3192000	3086800	4796500	0
AAMGHQEPFDLR	12	1370.64	43.544	0	0	0	0	0	8610700	0	0	0
AAMLQPQIILLK	12	1337.81	60.91	20786000	18823000	24665000	0	0	0	3445900	3687200	0
AAMQAAEELHR	11	1225.59	25.701	2685400	5669400	4806800	1375100	0	0	0	0	0
AAMQGFTQK	9	980.475	73.248	7421300	6619200	0	5164300	14620000	13644000	0	0	0
AANAHEFIISLPQGYDTLVGER	22	2400.21	55.208	0	0	0	0	0	0	20605000	18075000	6741300
AANDEEYAGNVKR	13	1435.67	67.334	7128000	13558000	4626500	4641500	0	0	0	10982000	7213800
AANGPTVAPR	10	952.509	105.57	10926000	13837000	8191300	3343600	3646600	9724300	0	0	0
AANGVVIATEK	11	1071.59	61.765	34977000	33673000	42640000	10208000	23576000	30294000	51682000	36763000	14892000
AANLFNPQLIQMIK	14	1599.88	125.71	0	0	164990000	0	0	0	0	0	0
AANLQFR	7	818.44	138.38	8637700	9375700	7498000	2742100	7748600	11298000	0	0	0
AANTDYR	7	809.367	100.07	10130000	7116500	9737000	7412200	6964700	13871000	0	0	0
AANVPLLLR	9	965.602	107.32	27018000	33607000	18454000	15241000	20557000	40919000	14844000	21239000	4104600
AAPAVEGAAVAALR	14	1265.71	73.781	0	15561000	13699000	14990000	0	0	4475200	0	3165000
AAPDLLFNLR	10	1128.63	52.482	0	0	0	0	0	0	0	0	0
AAPYAAAPK	9	858.46	88.029	35414000	38964000	39123000	14982000	25608000	24274000	28498000	47919000	9225800
AAQAQQAAAAPENVR	15	1494.75	94.767	20947000	24513000	32526000	18523000	24252000	37067000	48782000	43836000	29137000
AAQDIAATDLAPTHPIR	17	1759.92	66.939	21724000	18710000	31027000	8925900	41294000	33718000	25272000	25628000	11424000
AAQDIANAELAPTHPIR	17	1786.93	104.24	231990000	233760000	244330000	55397000	190080000	9517900	132140000	10459000	78168000
AAQDIATTELAPTHPIR	17	1803.95	55.33	0	0	3946800	0	52184000	55514000	0	42734000	0
AAQDLALADLAPTHPIR	17	1771.96	89.231	150610000	128300000	111480000	40434000	86962000	72738000	27666000	30466000	14805000
AAQDLSEIAK	10	1044.55	68.625	0	0	0	0	0	0	59547000	75831000	44795000
AAQEALIVR	9	969.561	109.86	19760000	7314900	14354000	61240000	51883000	80907000	113170000	115350000	47012000
AAQEAYKELQNAR	13	1490.75	33.782	0	0	5189600	0	0	0	0	0	0
AAQEVADYLGTR	12	1292.64	46.352	4837000	6540500	4349300	0	0	12893000	0	0	0
AAQGALLLNILSK	13	1310.79	43.604	0	0	0	0	0	0	2487400	3439500	945580
AAQGFLK	7	733.412	85.306	0	0	0	0	0	0	93833000	42133000	29060000
AAQGMPMR	8	860.4	65.672	6312400	8425100	6817800	0	0	0	0	0	0
AAQLDIVVTNK	11	1170.66	105.2	40619000	47649000	26620000	5901600	0	6236900	0	0	6505200
AAQLDVVVTNK	11	1156.65	84.213	39061000	46276000	33743000	6384600	922300	5374400	20154000	14343000	7855500
AAQLGLK	7	699.428	101.33	44106000	37278000	37712000	63738000	0	0	0	0	0
AAQQASEDWYR	11	1323.58	85.731	12187000	5308700	10529000	9090800	6465500	21381000	20524000	19261000	12114000
AAQQASEDWYRK	12	1451.68	50.207	5382000	0	9472600	7208000	0	0	8572700	8750900	5151000
AAQQINIPVPEGCTDPLAANFDPTAR	26	2765.34	81.656	0	0	43878000	77356000	0	161650000	30543000	83197000	26390000
AAQSLNGK	8	787.419	94.401	7568100	10065000	9105700	2528100	6379800	0	0	0	0
AAQTSRDEIVYLAK	14	1563.83	95.477	93344000	91319000	162130000	23200000	81634000	49195000	13389000	12595000	8336500
AASAAAEAAEK	11	988.483	90.108	0	0	0	0	0	3354800	9529500	13838000	10096000
AASAAGTIMTLSSWATSSVEEVASTGPGIR	30	2907.43	162.61	822500000	65701000	0	833380000	375640000	336710000	768420000	908450000	103950000
AASADQKPGPVPFFAAGISSVLHPK	25	2491.32	45.546	53032000	56124000	50448000	30265000	20594000	0	0	0	0
AASDAEILGEKEEELHR	17	1895.92	49.343	7463300	7608900	4118600	7539900	0	0	15636000	10698000	7371200
AASDDEPFSGLAFK	14	1453.67	127.51	81391000	0	67376000	93912000	96811000	171560000	64264000	85077000	17237000
AASEQAALSAK	11	1045.54	73.985	3135700	5732200	4321700	1001600	3041300	3905100	0	0	0
AASEYLYDLLTK	12	1385.71	67.207	0	0	0	0	0	0	8722300	9834500	0
AASFHPLVPK	10	1065.6	22.905	8638800	9910700	8366100	12877000	0	0	0	0	0
AASFNIIPSSTGAAK	15	1433.75	119.39	1378200000	1207400000	1084400000	605690000	1884900000	1506400000	1162400000	1147400000	513600000
AASGAAEELVSSESRPK	17	1687.84	42.647	14639000	9790300	7156800	4042600	0	14236000	0	4057200	5220100
AASLLEDLTK	10	1059.58	56.432	0	0	0	0	0	0	2145300	0	0
AASLLQIK	8	842.523	110.63	9497500	11231000	8244700	0	0	8996200	20852000	24053000	9286400
AASQASLLLQK	11	1128.65	45.738	14604000	31182000	11898000	0	0	0	0	0	0
AASSQDQEQGQK	12	1275.57	105.4	4879300	0	0	4182800	0	0	0	0	6815400
AASSSTSLNTR	11	1093.54	91.584	19889000	19895000	15733000	9815400	14372000	13688000	15815000	13185000	6359700
AASSTVSAPK	10	917.482	46.462	0	0	4278600	0	3390500	0	0	0	0
AATALELLR	9	956.565	66.351	23202000	30709000	20681000	0	0	0	0	0	0
AATAVANSLNK	11	1058.57	100.25	16545000	16896000	8544100	0	8043100	12925000	41169000	19469000	0
AATGASPDGGNVTITTSDGPR	21	1943.92	50.088	0	0	0	0	0	0	6495100	6778000	3312600
AATGSADFSAK	11	1024.48	85.807	5505500	5905400	4866900	3047200	0	0	4741000	13352000	1907100
AATGSFTPDR	10	1021.48	72.879	0	4906000	0	0	460330	568070	0	0	0
AATGVGIMMNDR	12	1234.58	90.108	33843000	27828000	18739000	14637000	10639000	38139000	36268000	45898000	14893000
AATGVGIMMNDRK	13	1362.67	49.929	6026400	6116900	8652100	3656900	0	0	0	0	4280400
AATSDTLTAPYNDLEAVEK	19	2007.96	151.66	198750000	265000000	38092000	93956000	17840000	143940000	42073000	53376000	10387000
AATTLSHASAK	11	1056.56	100.02	4402700	6222100	3990000	3619700	0	4577200	11633000	16519000	4196500
AATTTTTER	9	950.467	60.019	11253000	10119000	6517500	1990600	0	5326000	0	0	0
AATVQER	7	773.403	91.906	15206000	0	0	0	10689000	16198000	0	0	0
AATYEEIKDAIK	12	1350.7	138.22	262010000	302090000	142560000	77963000	220270000	441530000	166510000	159700000	65759000
AATYEEIKDAIKEASEGK	18	1951.97	119.68	0	0	225120000	0	0	0	0	0	0
AATYEQIK	8	922.476	83.753	501160000	676660000	517860000	583520000	361130000	512040000	1027000000	945090000	616250000
AATYFWPGSEVNK	13	1468.7	120.27	0	56449000	47453000	32383000	45314000	0	22047000	24739000	15223000
AAVAEELAEGHGDVGPR	17	1676.81	70.488	24496000	17119000	22508000	10141000	10131000	27556000	33603000	25610000	11956000
AAVAQAALAYK	11	1075.6	106.36	41727000	36765000	35007000	7512900	8111000	0	0	0	14817000
AAVATNDVVELPTQDK	16	1669.85	170.23	11492000	9436200	3121400	8097400	25144000	83816000	21498000	26480000	5055200
AAVATNDVVELPTQDKLR	18	1939.04	87.287	108600000	128820000	116170000	66395000	173040000	76137000	36815000	62210000	27177000
AAVAVIGDLADALGSK	16	1469.81	40.589	0	0	0	0	0	0	2910200	2452400	0
AAVAWEAGKPLVIEEVEVAPPQANEVR	27	2871.51	78.752	106440000	108120000	60075000	105660000	41657000	93476000	71780000	52791000	33895000
AAVDAGFVPNDLQVGQTGK	19	1885.95	64.827	25041000	0	19194000	18471000	0	0	12899000	18210000	8381900
AAVDLFHER	9	1056.54	44.318	0	0	0	0	0	0	6947100	9585000	0
AAVDSSNSDEVTDIR	15	1577.72	50.292	1974200	3390300	2829000	0	0	0	0	0	0
AAVEAIR	7	728.418	107.74	96530000	37874000	34279000	255400000	66893000	0	0	0	0
AAVEEGIVPGGGVALLYASK	20	1900.03	120.21	177770000	177880000	81937000	61583000	75502000	98221000	41403000	47724000	26116000
AAVEEGIVVGGGCTLLR	17	1699.89	89.663	49753000	0	58906000	0	0	0	11391000	13897000	7520000
AAVETMVK	8	847.447	79.469	10354000	0	1260500	7781900	7743500	13501000	0	0	7068900
AAVGVGPLR	9	838.502	56.122	5965900	4512100	5447200	0	871820	0	0	0	0
AAVGVGQMTWDNK	13	1375.66	121.8	29329000	37063000	12725000	8380900	72386000	15668000	40573000	6547000	7701800
AAVIAVTK	8	771.485	62.88	0	0	0	0	0	0	19452000	27891000	0
AAVIGDTIGDPLK	13	1268.7	91.658	112530000	118960000	57620000	127730000	0	188180000	67159000	77823000	24404000
AAVIGDTIGDPLKDTSGPSLNILIK	25	2507.38	104.53	266460000	189620000	48534000	168100000	0	853840	91751000	131120000	24044000
AAVITNNSSLESFGTK	16	1637.83	59.198	0	0	0	0	0	0	3004600	8916400	0
AAVLDADNLFPK	12	1272.67	89.047	59355000	35465000	71057000	164660000	294320000	166640000	220640000	170290000	108810000
AAVNAAYAGIPVVITSGYAPENIIK	25	2501.35	71.143	0	30976000	41249000	23934000	0	0	0	0	0
AAVPSGASTGVYEALELR	18	1789.92	145.83	696150000	638530000	161820000	201950000	80973000	174930000	219610000	233660000	57553000
AAVPSGASTGVYEALELRDGGSDYLGK	27	2682.31	101.77	140140000	89267000	491950000	57440000	8957900	0	38701000	19105000	55006000
AAVPTIK	7	698.433	100.07	134090000	75228000	98156000	296810000	211610000	301920000	537730000	665380000	401350000
AAVQETVSATLNR	13	1358.72	93.096	28956000	19572000	23502000	7794700	0	8695300	28234000	35582000	16338000
AAVTNAPR	8	798.435	97.602	17048000	18223000	15956000	0	0	1601500	0	0	0
AAVTTAFDNQFPGVNGLGISLAR	23	2318.2	243.04	5672000000	19473000	2450400000	5239700000	4821600000	6814700000	9884400000	10923000000	9237800000
AAWEIFTPLLHR	12	1452.79	88.187	37162000	0	9914900	14338000	0	0	13552000	13130000	1943800
AAYAEAQAK	9	921.456	72.789	39409000	28472000	36986000	54016000	27589000	29622000	0	0	0
AAYAIKDGAEGPR	13	1317.67	54.608	4026200	2762900	22156000	4437300	12253000	0	0	8965900	7246000
AAYNNPER	8	933.43	79.469	4783800	5150100	5850700	0	3242900	4181300	0	0	0
AAYPIEYIPNAK	12	1348.7	65.157	27087000	31756000	22968000	15968000	28671000	30920000	8122800	9568700	2936100
AAYSYYNVATK	11	1249.6	45.598	6972200	6117500	9633800	0	0	6195000	0	0	0
ADAAEYQK	8	894.408	111.82	123450000	120180000	90904000	31426000	32530000	69516000	101340000	79371000	42606000
ADAFEYADQVLER	13	1525.7	129.89	308800000	211410000	206390000	397850000	92540000	81549000	246210000	294690000	125530000
ADAGEGGLK	9	816.398	65.246	7794100	0	0	4348400	0	5727100	0	0	0
ADAGHVGVEK	10	981.488	103.88	126600000	91600000	90215000	223030000	99168000	200090000	897110000	654130000	331760000
ADALFLPR	8	901.502	62.659	0	0	0	0	0	0	0	0	0
ADAPPYGIDYAPTHRPTGR	19	2054	58.49	30179000	30096000	32845000	0	0	0	0	0	0
ADATVTIVHSR	11	1168.62	50.292	2363100	2541500	2367200	1464700	0	0	15219000	0	0
ADDATQFLDVIR	12	1362.68	123.86	201350000	0	101020000	80729000	0	169410000	40341000	44091000	17109000
ADDEYDYLFK	10	1277.55	61.691	0	0	0	0	0	0	11381000	12299000	3964400
ADDGSDTVTFMFESPTQDK	19	2089.88	118.73	28375000	33188000	0	0	0	0	0	0	0
ADDIVLSNMAAALDR	15	1573.78	81.431	0	0	0	0	0	0	20065000	24700000	5295200
ADDNVSLADVK	11	1145.56	46.39	0	0	0	0	0	0	9305400	0	8041800
ADDSGLASYVAGQVDR	16	1622.75	117.07	121290000	100170000	112250000	257440000	256640000	375470000	205570000	280410000	63883000
ADDSITVFTGVPTIYSR	17	1840.92	74.46	0	0	0	0	0	0	0	0	0
ADDTMNLGGIK	11	1133.54	37.549	0	0	0	0	0	0	0	4338900	0
ADDVIGPEVEK	11	1170.58	87.806	221520000	159740000	56799000	482880000	234430000	596830000	1052300000	1323200000	364050000
ADDVIGPEVEKLVASLPDGSVLLLENVR	28	2946.59	86.304	0	0	0	0	34000000	0	0	0	47751000
ADDVPLDVR	9	998.503	85.666	8105200	9342800	8214100	5697500	5995800	13180000	11455000	16629000	0
ADEFTLK	7	822.412	84.244	21542000	21235000	16113000	0	0	14403000	0	0	0
ADEFTLKK	8	950.507	36.557	0	0	0	0	0	0	17461000	10728000	7191100
ADEGASEVTGPIR	13	1300.63	81.017	3784700	4791700	2367800	3685500	0	0	6404400	10711000	2543800
ADEIHSSSK	9	972.451	36.585	11206000	0	3090100	16433000	0	24848000	0	0	0
ADEISDIIR	9	1030.53	101.43	294020000	290520000	188890000	573180000	1512300000	2432700000	1357400000	1540800000	552590000
ADEISDIIRER	11	1315.67	150.08	0	0	196100000	11390000	382890000	0	10158000	0	55808000
ADEQKLDEAK	10	1145.56	93.429	3319100	5858100	4980700	1866300	0	0	0	0	0
ADFDATVGIHPTAAEEFVTMR	21	2277.07	39.935	0	0	0	0	0	0	34194000	49020000	14517000
ADFELLEK	8	963.491	63.673	19035000	17796000	1907600	5448900	0	0	0	0	0
ADFELLEKK	9	1091.59	37.556	0	0	0	0	0	0	3389300	7004300	0
ADGAFAISEDR	11	1150.53	58.592	5106400	7665600	0	0	0	0	0	0	0
ADGAFAISEDRWNEPLGR	18	2002.95	212.02	904160000	835490000	681300000	177390000	0	284310000	53426000	56095000	29275000
ADGEREFMFYR	11	1419.62	84.188	11652000	7188700	35995000	0	0	0	0	0	0
ADGFAGVFPEHK	12	1273.61	26.969	0	0	0	0	0	89151000	21439000	5514600	0
ADGGLWLLVR	10	1098.62	163.99	67524000	67530000	31511000	65944000	0	0	17909000	19782000	4360700
ADGGPDWEGLLK	12	1256.6	64.297	0	0	0	0	0	0	2516400	0	1910200
ADGGWDTTR	9	977.42	64.04	8287900	10052000	6383500	5384700	3661600	7107200	0	0	0
ADGHESDKNIEIWK	14	1640.78	53.001	9301500	13532000	0	0	0	0	0	0	0
ADGHETDR	8	899.373	47.198	0	0	0	0	0	0	9297600	9490000	0
ADGHETDRNIEIWK	14	1682.8	18.596	9474100	6393300	0	5140600	0	0	0	0	0
ADGMIAHLASLAENR	15	1567.78	45.723	53621000	46869000	0	45989000	0	0	10779000	11918000	6483200
ADGQNTGNFITDRPSTK	17	1820.87	23.683	4648100	8814700	6679100	0	0	0	0	0	0
ADGSSSQSSFK	11	1099.48	96.342	10428000	7169200	5893800	0	5098400	8438700	13494000	0	6536100
ADGYILEGK	9	964.487	55.549	56580000	61694000	0	17135000	0	0	0	0	0
ADGYILEGKELEFYMK	16	1904.92	36.469	0	0	0	0	41853000	0	0	0	0
ADHFNPFLFDGIDETR	16	1892.87	79.837	65142000	62651000	50737000	41238000	0	0	13520000	10729000	3929700
ADHFNPFLFDGIDETRR	17	2048.97	61.962	68042000	72531000	48298000	28304000	0	0	16329000	18574000	5387100
ADIDGLQQELMHAR	14	1595.77	31.389	52815000	48979000	59839000	32366000	0	0	0	5292200	1950400
ADIEDYLASR	10	1151.55	166.61	66622000	62048000	54229000	50594000	71494000	0	31654000	26135000	13020000
ADIGIAVADATDAAR	15	1428.72	96.745	55079000	56310000	59629000	53548000	56104000	0	21244000	24034000	15410000
ADIHDLMVAIVK	12	1323.72	78.903	22384000	18816000	0	0	0	0	1676200	1978000	0
ADIHNNVLK	9	1022.55	81.296	37421000	33485000	24403000	81856000	52037000	158130000	550310000	390400000	106750000
ADIKDILER	9	1071.59	77.192	12360000	13142000	10916000	6078800	22988000	23097000	14609000	15392000	6566400
ADILDPALMR	10	1113.59	69.825	63317000	74791000	58127000	0	35534000	0	0	0	0
ADILDSALLRPGR	13	1395.78	157.38	214380000	152930000	88081000	163940000	54677000	396780000	110140000	153890000	30635000
ADILDSALLRPGRFDR	16	1813.98	54.812	21520000	0	43772000	20181000	42531000	0	0	0	0
ADISLDDLEVK	11	1216.62	74.6	51805000	0	0	34640000	0	0	23116000	25790000	5320900
ADIVGLWALR	10	1112.63	50.607	0	0	0	0	0	0	4444200	7764800	1822600
ADIVVAQDGSGGFK	14	1362.68	86.014	0	0	0	22174000	0	0	228430000	177560000	167480000
ADIVVQDPSQPHFDVK	16	1793.89	154.36	246240000	293350000	227150000	58760000	115100000	98412000	32848000	27847000	17525000
ADKKDYDEVDLANLQK	16	1863.92	30.739	4926400	3437500	7287000	0	0	0	0	0	0
ADLFSESQR	9	1051.49	58.981	0	0	0	0	0	0	19668000	22254000	9228200
ADLGLLGFAPK	11	1100.62	78.149	0	0	0	0	0	0	11942000	14256000	4442200
ADLIAYLK	8	905.522	79.469	158770000	105580000	182170000	62704000	100390000	105220000	0	0	0
ADLLHSSSK	9	956.493	56.81	4658300	6952200	3842000	2667800	0	5283300	0	0	0
ADLNVPLGDNQNITDDTR	18	1969.93	148.52	1295800000	903090000	739120000	2305200000	1839100000	3069000000	1207900000	2143500000	693690000
ADLNVPLGDNQNITDDTRVR	20	2225.1	136.33	59236000	15919000	833760000	163040000	81104000	0	45581000	59264000	212800000
ADLQGALFK	9	961.523	63.48	12367000	11596000	12887000	16991000	0	71126000	41882000	54593000	28522000
ADLVIPVATVSAR	13	1310.76	62.408	0	0	0	0	24912000	53067000	14124000	20956000	6240600
ADLVNNLGTIAR	12	1255.69	147.75	1982900000	2122100000	2012200000	658230000	979680000	1508000000	324730000	289270000	233300000
ADMFRPEEFENAIR	14	1723.8	33.265	0	0	0	0	0	0	25575000	28470000	0
ADMNEVYAEYAR	12	1430.61	42.001	0	0	0	0	0	0	5227900	3009400	2576700
ADNLSAEK	8	846.408	71.692	0	0	0	0	0	0	0	0	0
ADNYAAQR	8	907.415	134.66	65952000	72345000	70453000	15756000	28385000	38732000	0	0	0
ADNYPYGIDYPTHRPTGR	18	2091.98	22.653	32296000	17288000	35232000	0	0	0	0	0	0
ADPHIIHR	8	957.514	39.646	7805400	0	0	0	0	0	0	0	0
ADPSDEAAHIEK	12	1281.58	72.2	9510100	12912000	1857100	4577800	2311800	9359500	30645000	32063000	4112100
ADPSEYKYFLYK	12	1522.73	42.095	0	0	0	0	17738000	0	0	0	0
ADPSIPEEELLIPLK	15	1662.91	46.352	0	0	0	0	0	0	8456100	7881100	3632200
ADPVTQEIQK	10	1127.58	64.711	0	34663000	14012000	4608400	5104800	15465000	0	0	0
ADQAEAVAAPAR	12	1168.58	81.338	4494500	7207100	6712500	3140500	2196400	1462700	0	0	0
ADQLTDDQISEFK	13	1508.7	117.25	125140000	190370000	54235000	53577000	67988000	142120000	34966000	43348000	9260300
ADQVDTQQLMR	11	1303.62	53.683	2376300	4347600	3000500	0	972670	0	0	0	0
ADRDESSPYAAMLAAQDVAQR	21	2264.05	84.166	342300000	400330000	228670000	86913000	101400000	247130000	38225000	48927000	19668000
ADSDSETNFVK	11	1211.53	73.985	0	0	0	0	0	2845200	0	0	0
ADSEGLDAIR	10	1045.5	44.318	0	0	0	0	0	0	0	0	0
ADSIFGHPLR	10	1111.58	94.114	0	0	0	0	0	0	0	0	10294000
ADSIFGHPLRR	11	1267.68	85.377	22825000	12732000	14049000	19091000	0	0	0	0	0
ADSMATEK	8	851.369	110.31	12960000	0	10365000	0	7066700	9427300	5694000	14389000	4793800
ADSVDQAAK	9	903.43	42.864	0	0	0	0	0	0	8032500	6770100	0
ADTGSASR	8	763.346	52.482	0	0	0	0	0	8751700	0	0	0
ADTLDPALLRPGR	13	1393.77	45.507	17642000	18665000	8479800	0	0	0	0	0	0
ADVDMNKR	8	947.449	102.72	115180000	79961000	88153000	23348000	14546000	38781000	0	0	0
ADVETDVPVTGVPK	14	1425.74	118.28	235780000	204780000	236570000	47804000	109190000	120380000	33890000	38074000	16708000
ADVETEVAVSGVPK	14	1399.72	45.653	0	0	0	0	0	0	9398100	8813300	6668700
ADVMLMK	7	806.403	41.502	1839500	0	0	0	0	0	0	0	0
ADVPGLKKEEVK	12	1311.74	39.006	0	0	1200200	0	0	0	0	0	13795000
ADVPGLR	7	726.402	99.384	194310000	127160000	74337000	78151000	90974000	109420000	17827000	27137000	303270000
ADVSDPEQVK	10	1086.52	87.476	8199600	7589300	0	6131000	0	9962700	25017000	38440000	12206000
ADVSTVALGIAASTASVILGGGTK	24	2158.18	209.33	133310000	135730000	141430000	0	0	0	142850000	260290000	61659000
ADVTEGSAK	9	876.419	114.28	49573000	38758000	38237000	61121000	55582000	80592000	30342000	38449000	58820000
ADVYRLPYLSSGGPGFALLEAAR	23	2422.26	40.83	0	0	174670000	0	2531300	0	0	0	0
ADWEEYDATSLIAK	14	1610.75	94.767	65012000	98683000	57642000	59882000	52597000	80197000	22887000	33084000	12810000
ADYALATGGAMVVK	14	1365.7	48.004	0	0	0	0	0	0	2930300	0	0
ADYDLTPR	8	949.451	61.962	4818200	5271100	5129800	0	0	0	4286500	0	2158000
ADYIAMASDWNR	12	1411.62	51.092	0	22624000	0	0	0	0	7985800	0	0
AEADFGRFDVK	11	1253.6	23.226	6261700	3094500	7387700	4915100	0	0	0	0	0
AEADFRDNYSPGWK	14	1654.74	19.323	10551000	12017000	20158000	3783400	0	9898400	0	0	0
AEAFPSFSFVNSSVR	15	1643.79	74.76	0	0	0	0	0	0	20096000	22020000	2672400
AEALMALAEEGR	12	1259.62	63.408	0	0	0	0	0	0	5177000	0	1413600
AEALSLQLQAAQAK	14	1440.79	67.113	5242100	5832500	0	0	0	0	0	0	0
AEAQAAYEK	9	979.461	77.732	12817000	13759000	8635900	4284700	4679900	0	22226000	19043000	8727100
AEASLLDASDRPEYGR	16	1748.83	17.281	0	0	0	0	0	0	5145400	0	2186600
AEATGIANQR	10	1029.52	28.209	0	0	0	0	0	0	17044000	14805000	0
AEAYRDEIGTLIK	13	1477.78	35.204	21905000	24118000	0	0	0	0	0	0	0
AEDAWAK	7	789.366	83.614	21958000	20836000	21311000	9490700	14388000	19206000	0	0	0
AEDDYDYLFK	10	1277.55	75.378	74019000	73936000	37509000	0	0	0	0	0	0
AEDEEHKKK	9	1112.55	113.71	0	0	0	0	0	5818700	0	0	0
AEDSKPVAVPTASGS	15	1414.69	44.425	9510500	9671300	8495200	5221400	0	0	0	0	0
AEDSYTHR	8	977.42	66.073	9882200	7011300	4742000	3086000	0	8161800	12850000	0	6145100
AEDTGEEKESK	11	1221.54	44.207	31705000	0	0	8774000	9043800	0	0	0	0
AEDVQGK	7	745.361	83.377	65612000	14827000	12794000	9076000	6340700	0	0	0	0
AEEAADIAGK	10	973.472	88.948	32728000	31841000	24860000	20123000	29066000	33644000	37909000	51773000	23773000
AEEAHKDLLEIFTK	14	1642.86	52.265	0	0	0	0	0	0	76848000	75891000	3249500
AEEEYVETEYYK	12	1551.66	76.465	0	0	0	0	0	0	6746500	5820600	0
AEEFVPDRFVGEEGER	16	1864.86	45.14	0	0	0	0	12519000	0	0	0	0
AEEIIAK	7	772.433	94.407	0	0	0	0	0	0	181230000	202990000	123770000
AEEILNSTPNAYMLQQFDNPANPK	24	2704.28	151.9	183350000	154110000	143640000	221700000	218950000	338750000	145720000	198360000	53445000
AEEIMGQAIR	10	1116.56	94.302	25172000	30712000	13198000	9936700	9328200	20468000	0	0	0
AEEIPEEEKNFGPHDR	16	1895.87	27.208	0	8404900	0	0	0	0	0	0	0
AEEIQYPVR	9	1103.56	102.71	9951300	14850000	12203000	4203700	9332300	14129000	6633500	5423100	0
AEEIYEK	7	880.418	79.469	111480000	122280000	46508000	24340000	57008000	115670000	38381000	51703000	33451000
AEELEYR	7	908.424	97.068	2653300	4052300	1897100	1412700	0	0	0	0	0
AEELINVGQK	10	1099.59	95.909	5765200	7506900	4683300	3071000	1396900	4003700	0	0	0
AEELLLDLEELR	12	1441.77	132.78	0	0	0	0	0	0	0	0	0
AEEMAQTFR	9	1081.49	105.14	7303300	4901700	3513700	32695000	18635000	38787000	44959000	80504000	27386000
AEEQPIKVEPEAPSSEPPTEAK	22	2362.15	104.21	9992900	0	6209700	16270000	89088000	85260000	48633000	40665000	22695000
AEEQVVAGTLHHLTLEAVEGGK	22	2287.18	22.4	0	0	0	0	0	0	9317700	11351000	2733200
AEESGASK	8	777.35	86.833	6163800	6036700	7595900	2687300	3719600	8537300	0	0	0
AEEVEAFFANR	11	1281.6	90.629	0	0	0	0	0	0	0	0	0
AEEYHQQYLAK	11	1378.65	94.309	0	0	0	0	0	0	33122000	25920000	14581000
AEEYHQQYLEK	11	1436.66	84.17	10911000	15246000	9430800	19768000	14493000	21881000	85274000	108330000	22080000
AEFLFEDIFK	10	1257.63	95.502	0	0	0	0	0	0	0	0	0
AEFPFEVIPK	10	1175.62	43.083	0	0	0	0	0	0	3807900	4802300	0
AEFQDSSVEK	10	1138.51	61.691	3086700	3286200	1867600	1899200	2671200	0	11707000	7003700	0
AEFSDRVPIR	10	1188.63	34.803	0	0	0	0	0	0	14817000	31101000	17328000
AEFTASVPLTR	11	1190.63	70.1	0	0	0	0	0	16174000	5373400	12865000	1078000
AEGAEVEGR	9	916.425	57.859	4558500	7381400	2702700	1507900	0	0	0	0	0
AEGEATSAK	9	862.403	87.639	55585000	6472800	5281600	36363000	4795300	6998800	12019000	0	0
AEGELYIDDGK	11	1208.56	79.148	11686000	12321000	2328200	3470700	0	8976700	9549700	8083300	1925200
AEGGFLGADVILK	13	1288.7	80.979	0	0	0	0	0	70685000	92945000	123990000	24700000
AEGIPSESHAVR	12	1251.62	69.451	17976000	1494000	0	0	13373000	0	35844000	19169000	17662000
AEGIPVSPYSVR	12	1273.67	41.117	0	0	0	0	0	0	0	24098000	0
AEGQAINPEIR	11	1196.61	64.04	0	0	0	0	0	0	8386700	6934400	3107200
AEGSGGLSHVE	11	1041.47	56.258	0	0	0	0	0	0	15516000	16123000	9228300
AEGTEFR	7	808.372	107.43	9231000	7495300	11129000	5467900	6030100	15734000	8086800	7707700	5961400
AEHAGEPESLIEK	13	1408.68	78.655	6907100	7529400	6797700	3541700	0	5458600	5402700	0	0
AEHLASIFGTEK	12	1301.66	70.056	17708000	26019000	0	0	0	0	0	0	0
AEIDSFVK	8	907.465	75.109	0	0	0	0	16317000	0	194690000	167980000	40346000
AEIETADAQK	10	1074.52	44.377	10055000	8779600	2604900	2941900	2276000	0	0	0	0
AEIFELSNGTMR	12	1366.66	66.595	28167000	22150000	29225000	0	0	0	0	0	0
AEIFTSK	7	794.417	119.57	73493000	64064000	48642000	45850000	41552000	55311000	0	188070000	89786000
AEISAALNK	9	915.503	83.206	0	0	0	81961000	94449000	69562000	0	0	0
AEISHIFR	8	971.519	64.567	27738000	32833000	26154000	9072100	0	23827000	15608000	20879000	6897400
AEIVELITQLEAQNPTPAPTEALSLLNGK	29	3059.64	139.67	0	37845000	0	1360400000	70319000	525220000	1149800000	2877900000	342610000
AEKPELLTVILPQSLK	16	1778.06	56.746	0	0	0	0	0	0	13999000	19234000	3931700
AELDELEREDFFR	13	1667.78	150.46	149320000	107410000	130930000	65439000	0	26112000	22898000	28974000	11354000
AELGQTDAAQEDFLK	15	1634.78	133.07	23463000	30007000	22657000	0	0	0	0	0	0
AELIFPVR	8	943.549	98.133	12672000	16914000	6086900	21918000	12346000	0	11406000	13967000	1864600
AELVNLLAK	9	969.586	86.794	102890000	100590000	94350000	61441000	82521000	75232000	25619000	39623000	16897000
AELVVDVLIK	10	1097.67	75.378	22396000	0	0	0	0	0	0	0	0
AEMELMAGR	9	1006.46	64.207	9955500	14995000	2633500	0	0	17121000	0	0	0
AENAEIK	7	773.392	89.55	17297000	21415000	5987800	8696700	6299400	16473000	0	0	0
AENLMLER	8	974.486	83.206	6289300	0	0	0	0	4615800	0	0	0
AEPGHVEILGQLLHAAK	17	1781.98	19.39	0	31538000	0	24514000	0	0	0	10711000	0
AEPVVVDAAYLK	12	1273.69	76.143	0	0	0	0	0	78931000	28216000	40108000	14415000
AEPVVVDAAYLKEIEK	16	1772.96	137.09	0	0	55888000	0	102340000	0	0	0	9768900
AEQAYTVASDSENTGEEK	18	1927.83	34.685	0	0	0	0	0	0	0	0	5168900
AEQELPLILSAELK	14	1552.87	80.245	43548000	86525000	33992000	11064000	0	0	8410300	4704300	3110200
AEQEYNIPSLAALSSAMR	18	1949.95	61.212	0	0	0	0	0	0	16706000	20549000	10951000
AEQLPDNNLDAITAAK	16	1682.85	43.991	0	0	0	0	0	0	7528200	6795800	4687800
AEQQLVNDVSR	11	1257.63	70.808	4030000	3527700	3248300	3222600	0	0	0	0	0
AEQWNVEVY	9	1136.51	67.277	0	0	0	0	40995000	0	26125000	34641000	8218900
AEQYLADSGVPYTIIR	16	1794.92	129.37	43656000	44762000	74468000	20835000	28304000	40266000	17391000	11995000	5685300
AESDATIESMK	11	1180.53	62.823	3489900	3541900	2589400	3376800	0	4829200	0	0	0
AESDATVPDAPAK	13	1270.6	44.309	2786000	3063600	2003600	1197600	0	0	0	0	0
AESDEKVQR	9	1060.51	72.138	0	0	0	0	6992600	8286200	0	0	0
AESKPGLR	8	856.477	67.032	40383000	49478000	59338000	13164000	26768000	23042000	0	0	35501000
AESLPTVSQYLSPYPAYPDFKPPTSPTPSQP	31	3361.64	21.169	0	0	0	0	0	0	57261000	90010000	19601000
AESSPLSTTSR	11	1134.55	93.111	9622000	12271000	6654200	9812800	13596000	24139000	61174000	57349000	21445000
AETAANDLKEEQK	13	1445.7	42.789	6560800	9280000	7347000	6729700	0	16150000	0	0	0
AETGSTTASR	10	979.457	83.948	26539000	25225000	19382000	5334700	22101000	19988000	0	0	0
AETIPEPK	8	883.465	62.464	10167000	7099000	0	15596000	9020500	19987000	33724000	23858000	13712000
AETNNQEEPALHATK	15	1651.78	40.589	2048200	2072300	0	0	0	0	0	0	0
AETPIDENEIR	11	1285.62	91.867	90422000	105880000	87068000	23333000	25086000	44300000	36429000	35777000	18961000
AETPIDENEIRITSQGR	17	1927.96	36.029	0	0	15526000	0	0	0	0	0	0
AETQENSSEAR	11	1220.53	136.57	42542000	29266000	21728000	11027000	10067000	12362000	21346000	28109000	5399000
AETQHHHEESLLEK	14	1686.8	66.215	84897000	82269000	71491000	15881000	23078000	41992000	104250000	37924000	59442000
AEVADVSEAVR	11	1144.57	103.7	15580000	18542000	10712000	3872000	4760400	5432400	6519100	7872300	10281000
AEVGVGPMTWDDSVAAYAR	19	1993.92	61.212	0	0	0	0	0	0	13746000	0	3901100
AEVIDNSAK	9	945.477	68.224	12833000	13408000	6034100	5946200	0	6922100	0	0	0
AEVIGGHK	8	809.44	60.788	0	0	0	0	0	0	0	0	0
AEVKDGVLYITIPK	14	1544.88	43.297	37609000	15808000	50846000	22664000	0	0	0	0	0
AEVLAQQQAQR	11	1240.65	103.56	0	2565100	0	0	0	1973600	6135400	6672100	1178100
AEVMYDK	7	854.384	79.451	0	0	0	0	0	0	34740000	62577000	10646000
AEVMYDKYSGR	11	1317.6	60.518	7054200	4997800	32305000	5703000	0	0	0	0	0
AEVNEGNTVK	10	1059.52	88.37	26860000	23662000	22362000	26692000	24456000	38793000	30053000	42779000	19646000
AEVNEGNTVKK	11	1187.61	67.214	22250000	15388000	24055000	20305000	12243000	9651600	8136100	35984000	5395800
AEVQMGETETFAFQAEINQLLSLIINTFYSNK	32	3648.8	51.236	21629000	46202000	10527000	0	6885400	0	0	0	0
AEVSDIAIAVR	11	1142.63	96.331	16714000	19449000	9679000	3644200	0	8570000	0	0	0
AEVSSGTEIGNK	12	1190.58	109.42	2446600	2995400	2705600	5192200	4648900	6303900	37444000	44064000	6789600
AEVTWIR	7	873.471	97.071	7415700	9474200	3317900	2106200	0	5437100	0	0	0
AEYAVDHNSGTGAVFFR	17	1839.85	55.851	11801000	14489000	31298000	19682000	0	0	7104000	9150500	9777400
AEYDESGPSIVHR	13	1458.67	79.633	23414000	28173000	13300000	10223000	9847500	27679000	21737000	27652000	7983300
AFAAAAIK	8	761.444	76.847	1824400	1812000	1167700	5012100	3282000	9056400	21191000	16782000	6021800
AFADAGADVLFIDALTSR	18	1851.94	88.075	0	0	0	0	0	0	0	55267000	0
AFADAGADVVFLDNLFSKDEMK	22	2402.15	61.89	83355000	68129000	0	0	0	0	0	0	0
AFADAVPSWDNIVIAYEPVWAIGTGK	26	2789.41	81.726	180670000	0	0	319110000	0	0	0	317750000	125770000
AFADEIGIPFMETSAK	16	1725.83	136.38	200490000	146990000	132780000	56663000	0	31814000	29559000	28408000	13296000
AFADLLK	7	776.443	76.847	30354000	28316000	26921000	20358000	0	0	0	0	0
AFAEYRPLDEK	11	1337.66	121.83	198630000	188680000	159150000	125910000	173280000	177610000	102500000	107070000	44475000
AFALLSEEGIAK	12	1247.68	95.311	0	0	0	0	0	28184000	0	0	0
AFATGGYAAMQR	12	1242.58	125.82	19554000	30235000	18855000	1339900	6161100	2418500	5205800	7536600	2761000
AFATYTNAK	9	985.487	85.212	0	0	0	6127500	0	0	0	22783000	0
AFATYVQAK	9	997.523	56.177	4066800	3229200	3337400	3231000	3908100	5317500	0	0	0
AFAVTSESR	9	966.477	64.265	6107500	6448800	6006400	2297100	3349600	5420300	5546000	4417600	5737100
AFAYFVLTGGR	11	1200.63	43.282	0	0	0	0	0	0	3256000	3339900	0
AFDDEGNPTK	10	1092.47	47.082	0	0	0	0	0	0	0	0	0
AFDEGPWPK	9	1045.49	84.568	5725200	5174600	6417500	6613800	0	28869000	11756000	14007000	6611400
AFDETNALISWR	12	1421.69	96.89	0	0	0	0	0	0	0	6255800	0
AFDLASKPEGAGTPTK	16	1588.81	93.623	528980000	438940000	317850000	223140000	93367000	453390000	328970000	293250000	250140000
AFDLASKPEGAGTPTKDFK	19	1979	50.392	14661000	15511000	203350000	13010000	0	0	15925000	8579600	20156000
AFDLGGHQIAR	11	1183.61	86.898	52953000	43552000	38993000	2780100	10324000	20242000	0	0	0
AFDYEAWSTR	10	1244.55	77.677	0	0	0	0	0	0	19764000	25328000	5990200
AFEDPDIIHVDDAVDPVR	18	2021.97	47.204	0	0	0	0	0	0	29831000	33774000	8260800
AFEEAEK	7	822.376	97.068	29621000	32285000	18596000	14683000	11578000	23724000	0	0	12266000
AFEEVLLFDPNNK	13	1534.77	72.643	0	0	0	0	0	0	6057400	8821300	3893900
AFEIINDLR	9	1089.58	152.63	674600000	547840000	487300000	180870000	422940000	409820000	104780000	72044000	29522000
AFEITTSSFSHK	12	1353.66	19.211	4377800	3910300	1899000	0	0	0	0	0	0
AFETQLLR	8	976.534	81.635	6976100	8736700	0	0	0	0	6720300	10176000	3647900
AFFAGSQR	8	882.435	110.34	29199000	37825000	23764000	10566000	16896000	25510000	18892000	32111000	7589600
AFFDATGGLWR	11	1239.6	107.47	197150000	127020000	0	109930000	0	0	35146000	40319000	12935000
AFFDSTGQLWK	11	1298.63	68.735	0	0	0	0	0	0	0	0	6365700
AFGADLILTDPTK	13	1360.72	100.69	0	0	0	68043000	0	0	52104000	51428000	15615000
AFGADLVLTDSAK	13	1306.68	130.79	189400000	161480000	142990000	160980000	0	147500000	90783000	85854000	32135000
AFGAELVLTDPAK	13	1330.71	107.83	224860000	193470000	139050000	202990000	127430000	180380000	150950000	158920000	44628000
AFGEDFLQDK	10	1168.54	99.802	154680000	149130000	32927000	25319000	0	132250000	19514000	23772000	6203800
AFGESSK	7	724.339	94.407	163710000	137570000	142010000	51465000	95606000	101910000	0	0	0
AFGGAFPAQVR	11	1119.58	58.815	8135300	8389200	0	2703300	0	0	0	0	0
AFGGQSLNFGK	11	1124.56	69.812	0	0	0	0	3632600	0	41308000	35393000	19441000
AFGIPENSVR	10	1088.56	44.349	0	0	0	0	0	0	5645900	8429800	0
AFGLGVDWR	9	1019.52	95.741	28612000	26677000	10843000	0	0	29806000	12890000	17991000	2102700
AFGMELLR	8	935.49	104.45	249180000	169600000	209040000	343330000	306990000	397460000	221750000	237440000	75415000
AFGWAAR	7	777.392	91.093	15706000	21322000	6613100	0	0	0	0	0	0
AFHNMLVVPPGSGIVHQVNLEYLGR	25	2746.44	86.182	97631000	132970000	35535000	27107000	0	0	33044000	18185000	0
AFHNYLEVR	9	1147.58	49.418	13438000	14477000	13839000	2427700	8433600	0	9720500	10054000	4893000
AFHTILSEIYR	11	1348.71	83.883	60945000	53678000	35737000	12135000	0	0	8378600	9355700	3138800
AFIAGVADDNGYGWAIAK	18	1837.9	88.441	212090000	175240000	0	0	0	0	0	0	0
AFIEPDLQTAHIK	13	1481.79	75.088	0	0	0	0	0	0	13507000	14868000	3717700
AFIGHISDSLR	11	1214.64	20.84	4465900	3444900	0	0	0	0	0	0	0
AFITAFR	7	824.454	122.15	22388000	25508000	11831000	23037000	168010000	125740000	41357000	49394000	0
AFLATNQLNTYDK	13	1497.75	43.512	0	0	0	0	0	0	13452000	15944000	3793700
AFLDATGSLWR	11	1235.63	134.05	79841000	75044000	63895000	25754000	61840000	0	14846000	7281800	4324900
AFLDISIDGKPVGR	14	1486.81	41.644	0	0	0	0	0	0	0	8878500	0
AFLGLGFR	8	879.497	149.06	0	20315000	0	13048000	0	22420000	2406000	3584400	0
AFLLSLLGPNH	11	1180.66	94.302	0	0	0	0	0	0	5612400	4969400	853250
AFLLSQDWQEYSSYK	15	1863.87	59.542	0	0	0	0	0	0	6373600	6085100	0
AFLNASSEEELLAGIRK	17	1846.98	86.378	27230000	0	0	34866000	0	0	23966000	20974000	6872500
AFLVEEQK	8	962.507	114.6	214080000	189870000	158940000	53106000	61740000	103130000	60586000	73637000	37602000
AFNEVNSALETK	12	1321.65	108.47	16473000	17023000	14101000	7654800	16304000	12146000	23356000	19820000	11954000
AFNLEEAPSDFK	12	1366.64	140.07	241330000	211240000	77577000	198600000	0	330900000	111350000	143020000	35522000
AFNPTQAEETYSMVTANR	18	2028.92	190.27	971570000	611810000	368730000	2438800000	1030100000	2713500000	2064700000	1763100000	562260000
AFPFRDQHFFASVEK	15	1824.89	48.823	0	0	23488000	25321000	22578000	0	26861000	18998000	12575000
AFPGFGTTGDDATR	14	1411.64	99.752	12617000	0	7730400	8275500	32777000	38743000	49976000	38370000	21250000
AFPNDYK	7	853.397	88.734	67224000	49019000	52756000	0	11562000	0	0	0	0
AFPVVDAEYLK	11	1250.65	43.512	0	0	0	0	0	0	0	0	7836100
AFQAVDQFLQLVK	13	1505.82	106.35	0	18235000	2997600	0	0	0	0	0	0
AFQDAINHLSQFASDGGAQLFVPAGK	26	2688.33	115.5	57951000	38783000	0	0	0	0	0	0	0
AFQDLNQGAIVGR	13	1387.72	103.7	9731400	17589000	7190900	7965200	0	0	20027000	28009000	9129500
AFQELIDEGK	10	1148.57	99.802	18200000	16073000	0	13576000	2676700	0	39510000	57624000	13305000
AFQELIDEGKVR	12	1403.74	75.509	10986000	11350000	25638000	13452000	37899000	6359800	38352000	39973000	22836000
AFQIGTK	7	763.423	94.262	44197000	33283000	46157000	25955000	45913000	50561000	99455000	97151000	53272000
AFQNSIFYLNSFADK	15	1763.85	76.522	0	0	0	0	0	0	8526000	0	3295900
AFQNSYYDR	9	1162.5	105.57	28612000	31122000	26868000	11938000	18290000	20993000	51706000	51044000	22426000
AFQSSYYDR	9	1135.49	144.38	122700000	140700000	133120000	100550000	81940000	149480000	327030000	335560000	172030000
AFQSSYYNR	9	1134.51	139.31	22236000	15199000	21766000	51663000	41341000	78546000	226430000	114820000	85203000
AFQTSEQESLVR	12	1393.68	67.726	4210500	4555200	4070600	1894200	0	0	0	0	0
AFSEDTAK	8	867.397	107.59	25723000	24240000	27522000	63071000	58156000	87252000	143640000	247160000	93559000
AFSEQTK	7	809.392	118.69	0	0	11771000	0	12499000	15029000	17228000	18823000	12720000
AFSGVSSAQFPWMK	14	1541.73	68.525	13488000	14595000	19233000	0	0	0	0	0	0
AFSIIEDVFEK	11	1296.66	71.349	0	0	0	0	0	0	3344000	4608000	1932100
AFSNMAVGYNNVDVNAANK	19	1997.93	191.95	105160000	88862000	89412000	232780000	264990000	417040000	190750000	243940000	57603000
AFSPTTINSGR	11	1149.58	53.327	16345000	0	0	0	8976800	0	0	0	0
AFSSAPVISLAVER	14	1445.79	98.156	101160000	86380000	60810000	0	0	0	17845000	20804000	4458200
AFSTYVQAK	9	1013.52	75.854	0	0	0	0	0	0	0	24003000	0
AFTADESSELDPDIR	15	1664.75	63.408	0	0	0	0	0	0	6386700	6048400	0
AFTGEYWNTK	10	1215.56	56.258	0	0	0	0	0	0	8718900	10781000	4737400
AFTIGIGGPVGTGK	14	1273.7	119.27	42105000	49681000	34180000	0	0	30019000	11567000	9815000	3912400
AFTNYLGSNK	10	1113.55	82.75	18903000	25300000	13015000	7267600	9087000	19037000	11786000	17293000	11295000
AFVAEMIGEGDHDHGFLD	18	1958.85	20.939	0	0	0	0	0	0	4608700	8651100	0
AFVDSGAQSTIISK	14	1422.74	42.001	6441100	4354700	3679200	2186600	0	0	0	0	0
AFVGNTIGQANGVYDKPLDLR	21	2247.16	43.12	0	0	0	0	0	0	36059000	40564000	17229000
AFVHWYVGEGMEEGEFSEAR	20	2329.01	69.737	165450000	186250000	0	20739000	0	0	23752000	19198000	1433700
AFVPPQHFIR	10	1210.66	56.563	6356800	7636900	3572100	0	0	0	0	5698900	2243200
AFVQVLGNEK	10	1103.6	131.06	83092000	84932000	103390000	225400000	132130000	382640000	630930000	649020000	255210000
AFVSEYAVTGK	11	1170.59	71.349	19466000	15464000	14336000	23266000	15538000	30612000	34186000	29205000	23033000
AFVSFVGR	8	881.476	104.11	15448000	13860000	5397200	2005100	0	0	0	0	0
AFVTFLAGDGDYVK	14	1501.75	54.143	58465000	31641000	7894000	0	44187000	0	0	0	0
AFVVHELEDDLGK	13	1470.74	127.76	179740000	269880000	76328000	123410000	0	127940000	61691000	53001000	18166000
AFVVHELEDDLGKGGHELSLTTGNAGGR	28	2878.42	154.49	935900000	784440000	834850000	34100000	0	0	114110000	49830000	18792000
AFVVVGDGNGHVGLGVK	17	1623.87	73.802	109780000	122270000	39722000	0	0	0	7919000	6938200	1632400
AGADLGSSDNATEETIQPSKEEIPR	25	2614.24	24.831	7460600	10871000	3107500	0	0	0	0	0	0
AGADVTVASVEK	12	1145.59	88.681	28554000	26456000	21171000	13601000	13364000	14749000	49384000	33071000	16491000
AGADVVSPSDMMDGR	15	1506.64	94.465	19051000	26160000	23400000	8434100	15915000	45274000	10269000	14752000	2967900
AGAEMLVMAYGR	12	1267.61	128.12	31300000	25739000	30701000	0	0	0	0	0	0
AGAEVIGISGDDVSSHK	17	1640.8	163.51	155940000	78548000	132260000	152600000	198330000	787450000	582080000	770840000	276810000
AGAGSATLSMAYAAAR	16	1467.71	110.93	34428000	36423000	31587000	16325000	0	0	0	0	0
AGAGSATLSMAYAAVK	16	1467.74	159.94	235320000	189550000	214860000	380550000	495830000	108560000	306430000	487380000	95542000
AGAIPMR	7	714.385	98.513	34894000	27973000	49539000	26428000	0	35092000	64390000	78704000	33531000
AGAIYER	7	778.397	85.359	0	0	0	0	0	0	32202000	30345000	24132000
AGALGDTVTVTR	12	1159.62	102.06	167760000	160080000	162220000	43018000	62825000	81594000	107730000	72824000	39230000
AGAMNALIR	9	915.496	85.265	0	0	4544000	0	0	3785400	0	0	0
AGANVVLTTK	10	972.56	108.81	22302000	29591000	22935000	4915600	7703800	2810100	9155000	13790000	12505000
AGASVNNIPLYK	12	1245.67	99.802	82439000	92418000	82298000	0	0	138150000	99615000	115120000	46332000
AGAVSALFLLDIK	13	1316.77	34.721	0	0	0	0	0	0	0	0	0
AGCAIPFNEVAR	12	1303.63	39.305	5851800	6418100	6693500	1381000	30118000	0	0	0	0
AGDDRNEAAESTLSDYK	17	1840.81	44.391	15123000	22238000	10139000	5768000	0	0	7029200	0	4896300
AGDEQLNVFR	10	1147.56	182.39	37140000	26384000	19892000	16527000	19656000	65937000	37364000	52680000	16574000
AGDLSSSPSLK	11	1060.54	54.416	0	0	0	0	0	0	52344000	43881000	9806200
AGDQTEWSYYK	11	1346.58	54.722	9104700	8528300	6049000	705260	0	7465700	0	0	0
AGDTLVFNYGR	11	1211.59	159.58	99745000	143970000	124780000	23022000	0	0	15826000	8536200	0
AGDYLHQYEAK	11	1293.6	86.898	23878000	16627000	16063000	24995000	16608000	10121000	50898000	62343000	34906000
AGEDAETLGLTGHER	15	1554.73	127.17	3267900	4568400	3066400	1511900	0	0	89879000	78941000	19422000
AGEDVSSK	8	791.366	104.37	34328000	37567000	23788000	11880000	14470000	21103000	0	0	0
AGEEEKSEFYLR	12	1456.68	104.05	29589000	22248000	22156000	7629700	0	36598000	16183000	27261000	9296200
AGEFFHSAQSSALEQHR	17	1900.88	127.29	30625000	22542000	3414100	24741000	0	36198000	43291000	38639000	12235000
AGEIGMVSGIPQEHLHR	17	1829.92	53.169	36735000	38845000	24690000	14031000	48671000	51449000	16862000	14661000	5177400
AGEIVVFNVDGR	12	1274.66	47.228	0	0	0	0	0	0	0	8055200	4639700
AGELRDREMDLK	12	1431.71	36.417	0	0	8658100	0	0	0	0	0	0
AGELTAQELDTLMTIVANPR	20	2142.1	174.78	396840000	22053000	25498000	0	0	0	6197100	8315200	4049300
AGEMVAER	8	861.401	71.501	5178900	4283800	6424400	3916500	5985200	8265900	9636100	14255000	3506700
AGESHLDAMLR	11	1198.58	50.473	18598000	24645000	0	10493000	0	0	0	0	0
AGFAGDDAPR	10	975.441	75.378	341600000	357080000	256980000	150310000	183110000	243310000	330220000	323240000	157880000
AGFAGIILEDQVSPK	15	1543.82	100.55	0	0	0	0	0	30646000	17986000	24268000	7930400
AGFEDFKR	8	968.472	71.342	24099000	15113000	15526000	32306000	35662000	44668000	94957000	101000000	39608000
AGFGGVMIDDQVSVK	15	1521.75	98.156	331710000	234500000	127090000	0	0	0	0	0	0
AGFIGSQR	8	834.435	70.69	5152600	6637400	4558400	5806800	6061400	10105000	23391000	22456000	0
AGFINVQLK	9	988.571	121.29	35909000	38742000	28783000	34528000	0	0	17729000	24847000	8172300
AGFKDVQLK	9	1004.57	40.724	0	0	0	0	5997400	0	10001000	7691000	6783500
AGGASYSSVVK	11	1024.52	81.95	28552000	28749000	29750000	16717000	24057000	21525000	37502000	51775000	24840000
AGGAYTLNTASAVTVR	16	1550.81	142.08	61695000	55246000	54707000	11888000	67981000	89295000	45604000	37441000	21899000
AGGECLTFDQLALR	14	1549.76	128.81	0	0	0	0	0	0	0	0	1883500
AGGFPEPEIIHYNPK	15	1667.83	115.7	219180000	154690000	158430000	493090000	408840000	745360000	235580000	363350000	71653000
AGGFSSDGHQSVLEK	15	1517.71	150.14	154240000	105360000	124480000	251430000	171590000	180250000	513380000	607840000	306260000
AGGIFLPLVK	10	1013.63	82.716	50930000	58400000	52075000	142930000	106400000	155390000	44334000	53660000	24896000
AGGLQDK	7	687.355	84.244	513400000	415130000	102000000	241310000	100560000	358750000	0	0	0
AGGNLVDPEWLDGSLPGDYGFDPLGLGK	28	2858.38	41.695	0	0	0	0	17843000	0	0	0	0
AGGNLVDPEWLDGSLPGDYGFDPLGLGKDPAFLK	34	3529.74	77.925	0	1008600000	0	517330000	0	0	0	0	0
AGGNTNIADGLR	12	1157.58	72.643	29018000	31889000	42726000	17906000	18115000	27768000	33309000	25505000	11521000
AGGTMTGVLSAANEK	15	1405.69	97.911	0	0	0	0	0	0	12905000	21938000	2527800
AGGVFLPIIK	10	1013.63	84.916	65581000	58504000	52130000	105530000	0	137640000	44757000	63330000	21494000
AGGVLPGIK	9	810.496	82.305	46469000	26630000	21461000	22451000	21934000	35260000	48239000	46682000	34393000
AGGVVPANCCNGVR	14	1429.66	72.928	20689000	13939000	100840000	9890500	6699100	24426000	0	0	0
AGGYGLIIPK	10	987.575	78.324	60101000	50452000	58399000	63269000	55643000	0	25514000	36454000	17486000
AGHPTFALVR	10	1067.59	78.098	19582000	17382000	11561000	8417200	12775000	16313000	0	0	0
AGHQTSAESWGTGR	14	1443.65	114.7	150840000	255080000	129470000	45922000	0	110710000	107690000	176320000	51546000
AGIALNEK	8	814.455	97.798	663650000	639410000	509770000	318540000	337200000	437320000	1398000000	1468100000	906630000
AGIALNSNFVK	11	1132.62	99.139	172390000	193270000	163640000	53265000	0	0	168800000	156720000	70029000
AGIAPSK	7	642.37	92.467	22913000	44977000	28593000	0	13048000	0	0	0	0
AGIEQGPQIDPEQFDK	16	1770.84	125.54	100910000	78419000	16915000	125250000	40836000	225320000	48026000	77041000	17950000
AGIEQGPQIDPEQFDKVLSYIK	22	2474.27	89.946	0	0	0	0	0	0	66793000	0	141350000
AGIFVVQAAGNTGPSPK	17	1612.86	93.011	11402000	10495000	11111000	0	0	0	0	0	0
AGIGHITQDWEPVVVR	16	1775.93	191.79	34633000	0	35474000	25903000	0	31068000	3788700	3886800	2161700
AGIGLSDSFMK	11	1124.55	93.111	0	67627000	58197000	0	0	0	0	0	0
AGIIALR	7	712.46	112.27	21011000	25334000	19876000	6390500	5849000	11539000	17240000	12960000	3777300
AGIIDPLK	8	825.496	67.981	36769000	47622000	26152000	0	14300000	35820000	0	0	0
AGILAALR	8	783.497	81.381	0	0	0	0	0	0	4750100	5638300	0
AGINVIQIDEAALR	14	1481.82	200.68	472670000	409660000	178010000	39495000	113050000	150130000	18311000	0	0
AGIQEIHFLPFNPTDKR	17	1982.04	99.392	113910000	55066000	43896000	60872000	38087000	103620000	21460000	15449000	8226800
AGISAIR	7	686.408	88.643	20563000	25826000	20142000	0	0	11039000	0	0	0
AGITVIQIDEAALR	14	1468.82	138.25	379000000	326090000	115640000	0	0	110440000	60689000	58213000	15060000
AGIVEISEVIYNR	13	1461.78	179.81	528790000	328550000	213130000	115320000	132100000	169450000	36346000	29520000	24969000
AGIVPVAYR	9	944.544	81.635	45470000	54000000	50152000	15930000	217660000	45314000	31984000	0	0
AGIVPVSFR	9	944.544	74.127	0	0	0	0	0	0	0	38903000	25828000
AGIVPVSYR	9	960.539	66.073	53669000	62251000	30353000	0	3751800	19352000	0	0	0
AGIVPVVFR	9	956.581	110.61	103760000	47166000	46087000	28494000	47988000	71873000	6131800	7009800	2522300
AGIVSSLDALVK	12	1171.68	70.056	157870000	161710000	47282000	49105000	27914000	108560000	0	0	0
AGKFPTLVTHQESLESK	17	1870.98	65.298	11319000	0	49200000	0	45940000	0	0	0	0
AGKPVQIPIYDFK	13	1474.82	37.793	0	0	0	0	0	0	8187700	9374600	0
AGLEDMLK	8	875.442	69.176	0	0	0	0	0	0	0	0	0
AGLEPQATAQK	11	1112.58	61.679	5717000	6583300	3781700	3682500	0	7379400	11027000	13453000	5164900
AGLIDAAPWIR	11	1181.66	83.313	104060000	111920000	92338000	30838000	0	0	0	0	0
AGLNIVEQSLWK	12	1356.74	71.451	0	0	0	0	0	0	7086700	6870700	0
AGLNSAIIR	9	913.535	67.032	4861600	4734200	3483600	0	1664200	2300200	0	0	0
AGLNTLTK	8	816.471	70.525	0	0	3105000	0	4646400	11501000	0	0	0
AGLQFPVGR	9	943.524	97.071	2194300000	1988000000	2103500000	668420000	2602200000	4111300000	1584500000	1420300000	538940000
AGLQYVGPELDAMK	14	1490.74	78.653	60649000	80388000	0	0	0	39405000	0	9587600	4478200
AGLSDPHRPIASFMFMGPTGVGK	23	2372.18	19.113	0	0	0	0	0	0	0	6787000	7071100
AGLSIEEANELER	13	1429.7	83.397	0	0	0	0	0	0	7488600	10450000	1625700
AGLVNALK	8	784.481	100.07	11969000	17917000	13485000	0	0	0	16411000	25217000	4395200
AGMIFYR	7	856.427	94.669	61258000	50534000	38719000	23391000	6956600	71885000	54589000	59780000	16695000
AGMIPLQMELGGK	13	1343.69	108.43	16406000	0	0	36703000	0	0	16124000	28016000	0
AGMNQLAR	8	859.433	81.381	55493000	66073000	47224000	8226600	16130000	18848000	0	0	0
AGMNVAR	7	717.359	91.093	38130000	40962000	26593000	0	19676000	8838400	0	0	0
AGMSYFHETIWK	12	1468.68	39.661	85857000	78389000	63291000	71914000	0	0	29137000	36145000	10783000
AGMTHIVR	8	883.47	83.364	39335000	50433000	44032000	15913000	0	41225000	17635000	21516000	33981000
AGNAYHK	7	759.366	101.33	0	0	0	0	3664900	0	0	0	0
AGNGEDFFPR	10	1108.49	46.129	2410400	4433100	3537700	0	0	0	0	0	0
AGNINYYDIR	10	1197.58	76.827	26832000	31711000	0	0	13888000	30873000	29626000	31075000	15537000
AGNLGHITR	9	937.509	35.541	5729300	7677000	8121800	0	0	0	0	0	0
AGNVDMAFNLYDR	13	1484.67	69.979	0	0	0	0	0	0	4022800	5948200	2688800
AGNVESSVKPVESVVK	16	1627.88	39.143	0	0	0	13657000	0	0	14663000	26419000	18358000
AGPGSESANLK	11	1029.51	74.92	8034100	13055000	7116500	0	5820100	12772000	0	0	0
AGPGYATPLDAMSGPR	16	1559.74	36.847	0	0	0	0	0	0	0	6421900	2135900
AGPNFSLAIR	10	1044.57	125.49	55730000	56910000	35876000	34420000	0	65391000	0	15751000	5840400
AGPPVDQTIK	10	1024.56	51.346	13024000	15262000	11184000	6943700	0	11942000	0	0	0
AGPSASLSELIR	12	1199.65	72.848	0	0	0	0	0	0	0	0	0
AGPTGLDTDNRR	12	1271.62	31.348	0	0	0	0	0	0	28240000	15838000	16959000
AGPTWHANLAK	11	1164.6	65.305	186520000	294620000	269810000	94168000	0	93459000	151330000	121770000	74585000
AGQESHTAITEFDR	14	1560.72	98.253	99205000	121350000	59147000	37558000	20785000	67367000	115580000	101160000	35746000
AGQESHTAITEFDRTEK	17	1918.9	96.666	80805000	113290000	92999000	36032000	12389000	13761000	39751000	31234000	30177000
AGQGAFGNMCR	11	1167.49	48.794	4413300	4291200	8380100	0	0	0	0	0	0
AGQLFGYPLMIK	12	1336.72	74.92	36295000	22058000	13004000	10018000	0	0	5632800	10485000	4201400
AGQLYAEK	8	878.45	93.374	0	0	0	0	0	0	0	74729000	0
AGQYLQLK	8	919.513	111.28	0	0	0	0	0	36472000	65401000	63852000	0
AGRPIPIPNSGIQITQLGHVK	21	2195.25	75.533	0	0	0	39561000	0	79685000	40410000	64782000	22345000
AGRPIQAQQYSETEAMK	17	1906.92	65.107	10898000	6261100	0	1627300	6540300	15086000	0	0	0
AGRYEENNLK	10	1192.58	55.353	0	0	0	0	15328000	0	13021000	8025400	6139500
AGSAASLSSLLNR	13	1245.67	107.83	0	0	0	0	0	200870000	7235100	7375600	1220500
AGSDTEVLWNDAR	13	1432.66	89.171	15386000	14783000	12155000	6790400	34564000	0	16479000	22043000	6803900
AGSGVATLGLPDSPGVPK	18	1621.87	135.26	268320000	304130000	330650000	127740000	182180000	244800000	37687000	52315000	20708000
AGSLSLR	7	702.402	97.068	10407000	12038000	13076000	9533800	11706000	15793000	35227000	35912000	0
AGSLVVTDLDSTNGTFINDKR	21	2222.12	35.421	0	0	0	0	42087000	0	14722000	14951000	6667700
AGSMDNGDGIAVGWLGHPIFR	21	2169.04	247.11	732680000	471620000	361580000	2086300000	364760000	2160200000	1380100000	1249400000	249980000
AGSPFWNSGHLK	12	1299.64	41.401	0	0	0	0	0	0	20277000	16490000	3533300
AGSSALEGR	9	846.42	66.692	7338500	11500000	9842700	4318500	4669500	0	0	0	0
AGSVFAALGSDGGVK	15	1334.68	61.435	0	0	0	0	1808400	48760000	0	0	7844600
AGSYAANVIIQR	12	1261.68	160.88	62456000	50135000	42912000	14975000	13161000	27387000	30886000	16648000	17006000
AGTEGSNTEFER	12	1296.56	167.12	25123000	17818000	14648000	28517000	17030000	33058000	56799000	85925000	71773000
AGTEGSNTEFERR	13	1452.66	35.594	12718000	11984000	18803000	14495000	0	2932300	0	0	0
AGTLNVR	7	729.413	103.29	86277000	79566000	82681000	55188000	94590000	116910000	122820000	120510000	58782000
AGTNEPIISK	10	1028.55	51.113	5176400	7826500	7049300	0	0	0	0	0	0
AGTSTNTQSTGTSQTIAVGLWGGPGGSAWDDGSYTGIR	38	3713.72	132.34	0	403680000	401820000	0	0	0	0	0	0
AGTVTPNIPQAIAEFK	16	1655.89	97.463	0	66687000	24732000	41074000	0	0	12662000	24421000	5999400
AGTVTPNIPQAIAEFKK	17	1783.98	50.966	92823000	87205000	128410000	62274000	96935000	0	0	0	0
AGTYDEK	7	782.345	101.69	0	0	0	0	0	0	141530000	152930000	44844000
AGTYDEKR	8	938.446	98.997	186460000	133430000	194720000	100550000	68988000	90712000	201980000	152180000	69355000
AGVFMELR	8	921.474	92.187	35088000	20301000	20503000	15488000	0	0	0	0	0
AGVIGFTK	8	791.454	86.794	30006000	36114000	31442000	0	11508000	0	10826000	16278000	5727000
AGVLASLK	8	757.47	89.142	0	0	0	0	0	0	20561000	0	8022800
AGVLFEGGNWDR	12	1319.63	55.567	0	0	0	0	54083000	0	0	0	0
AGVNFFTQIK	10	1123.6	94.806	22851000	0	28462000	26334000	0	0	0	0	0
AGVNVSVVYGVMPPEAYR	18	1906.96	50.188	0	0	0	0	0	0	6965600	7849300	0
AGVPFEQGLLR	11	1185.65	82.426	0	0	0	0	0	61716000	0	0	0
AGVPTVPGSEGLLQSTEEAVK	21	2068.07	112.96	95772000	102150000	34491000	22148000	0	50503000	0	0	0
AGVSDLGAAQDLAR	14	1342.68	103.34	38061000	29897000	40957000	64325000	314840000	420240000	136340000	154240000	46242000
AGVSQVLNR	9	942.525	69.998	6136700	8630000	4987500	0	5033200	0	0	0	0
AGVVPEGSQFDAR	13	1331.65	127.76	75494000	94429000	73402000	47122000	93600000	97586000	39910000	37060000	16363000
AGVVPISPR	9	894.529	87.323	9442300	9132700	14553000	23537000	34305000	44724000	59284000	50980000	0
AGWGVMASHR	10	1070.51	51.949	73466000	63598000	36383000	36418000	0	33387000	115460000	132490000	42857000
AGWLPADDSGYPK	13	1375.64	64.73	22833000	16845000	15190000	7819500	0	0	0	0	0
AGYAGEDAPK	10	977.445	56.258	3591800	3942100	0	0	0	6644600	0	0	0
AGYASAITDSPK	12	1179.58	41.399	0	0	2995100	0	1968200	3730600	0	0	0
AGYILSGSHDSK	12	1233.6	17.694	3539000	4653300	0	0	0	0	0	0	0
AGYKADDEYDYLFK	14	1696.76	90.697	16278000	18363000	28658000	0	0	0	0	0	0
AGYQGSTFK	9	957.456	65.246	0	0	0	0	6430900	0	24431000	23329000	10495000
AGYTPIDYPSESEWR	15	1769.79	64.439	0	0	0	0	0	0	7089600	8886700	6017800
AGYVIPVEITVYDDK	15	1680.86	76.522	40726000	0	0	23394000	0	54468000	12856000	19308000	1600600
AGYVPQDEVAIYQSK	15	1666.82	46.592	5583000	6511000	8506400	0	0	0	0	0	0
AHADNHYDPNALPEIK	16	1803.85	42.191	18876000	7767400	14202000	0	0	0	0	0	0
AHAESVNLQFENPLDEDTAR	20	2255.05	154.74	109280000	142900000	43182000	70993000	27840000	89051000	49253000	52790000	6831300
AHASMLAK	8	827.432	72.138	0	0	0	0	0	0	0	0	0
AHASTEGVAK	10	969.488	89.752	592140000	434970000	379380000	126900000	172390000	214040000	473200000	0	269110000
AHASTEGVTK	10	999.499	114.28	2047200000	952510000	1225800000	3456700000	919700000	2361800000	3995300000	5943700000	1934900000
AHAVSINPLDTR	12	1292.68	50.207	3285700	6952100	0	0	1407300	0	8586000	9595800	0
AHDVDHGLNLEK	12	1346.66	24.514	0	0	0	0	0	0	6218100	10848000	5911500
AHEAEEQANAR	11	1224.55	45.908	6544400	4799500	3707200	2078300	0	2125500	0	0	0
AHEIAGLR	8	865.477	60.648	0	0	0	0	0	0	0	0	0
AHFETEATR	9	1060.49	88.948	35039000	28974000	17948000	13237000	0	7141700	28001000	37666000	7929900
AHFSIWALSK	10	1158.62	34.692	0	0	0	0	0	0	4765500	2136200	994880
AHFTAPSSVR	10	1071.55	84.743	146990000	161130000	40695000	9580000	0	50165000	89274000	60132000	24647000
AHGEETVKIPVK	12	1306.72	28.764	9427500	11190000	0	0	0	0	0	0	0
AHGEGNLGTQALILALER	18	1862	86.213	0	0	0	0	0	0	27941000	20038000	6556800
AHGGFSVFAGVGER	14	1389.68	120.77	192610000	210980000	15856000	4956700	1533300	1238800	69294000	74279000	30884000
AHGGGLSGQAQAISLGIAR	19	1762.94	190.86	253630000	163240000	201790000	175150000	0	399450000	0	0	0
AHGGVSVFGGVGER	14	1327.66	91.549	240110000	199550000	240000000	167790000	0	5851400	1693900000	2150700000	745570000
AHGLAPEIPEDLYHLIK	17	1915.02	93.839	560720000	634680000	128670000	43334000	8207600	0	43944000	35175000	3280300
AHGLAPEIPEDLYHLIKK	18	2043.12	67.646	106240000	109610000	74553000	0	0	0	0	0	0
AHGPYIAGEK	10	1041.52	53.775	0	0	0	0	5703400	0	54614000	36908000	23382000
AHGTAVGLPTEDDMGNSEVGHNALGAGR	28	2732.26	94.72	60745000	48570000	41091000	21104000	108160000	140060000	20124000	57561000	13227000
AHIEIDPEAAR	11	1220.61	37.968	0	0	0	0	0	3703100	0	0	0
AHLAAVASAYR	11	1128.6	84.615	29188000	39873000	22912000	8950200	0	3347300	9409300	13712000	0
AHLAIYK	7	814.47	89.457	0	0	0	20436000	0	39480000	69958000	91879000	23996000
AHLENGVLR	9	1007.55	68.224	50175000	26544000	21122000	9297300	0	0	0	0	31535000
AHLGGGAEAHAR	12	1145.57	43.544	4205000	7032800	0	1336100	0	0	0	0	0
AHLMEIQVNGGTIAQK	16	1708.89	92.265	49672000	58163000	16724000	3796000	0	0	20077000	30458000	6604900
AHLSCGAGQK	10	1027.49	67.169	0	0	0	4485700	0	0	5843000	10178000	2960800
AHPDVFNMMLQILEDGR	17	1984.95	63.691	0	0	0	0	0	8825500	0	0	0
AHPGGPAASDFDWGTGETPR	20	2024.9	79.676	21606000	20428000	15379000	24917000	0	91400000	23513000	20225000	7591400
AHPGGPAASDFDWGTGETPRR	21	2181	29.636	16878000	13639000	22919000	13415000	58934000	48912000	25185000	29923000	12867000
AHQFLDDLHR	10	1250.62	66.595	3458300	2279800	0	7287300	0	20751000	0	0	0
AHQFTHVR	8	994.51	34.253	21659000	0	0	0	0	0	0	0	0
AHQLVMDGFNWAHEQK	16	1909.89	56.25	16508000	22359000	8856900	14085000	0	0	0	0	0
AHSDVFNVFLQILDDGR	17	1944.97	48.883	0	0	0	0	0	5002000	0	0	0
AHSQGVTSVSFFR	13	1421.71	31.881	3450700	4026600	3100700	1857200	0	0	0	0	0
AHTDMVTAIATPIDNSNIIVTASR	24	2510.28	181.87	431370000	868600000	318160000	139020000	0	0	120690000	142370000	43086000
AHVEGQLK	8	880.477	98.418	4616800	9383700	1912700	3316300	0	0	0	0	0
AHVIVIGATNRPNSIDPALR	20	2113.18	31.514	19126000	22291000	0	0	0	0	8719000	10475000	3684200
AHVTVVPK	8	849.507	121.29	272580000	399140000	242330000	0	59337000	85765000	0	0	0
AHVTVVPKEEGSLVK	15	1591.89	98.592	11243000	6949700	89500000	0	0	0	0	0	0
AIAAAVEGVEK	11	1056.58	61.78	0	0	0	0	0	0	5089700	0	0
AIADALR	7	728.418	103.28	44035000	45332000	19308000	60472000	78451000	150670000	154920000	136500000	107810000
AIADGSLLDFMR	12	1307.65	118.71	64072000	0	0	36928000	0	0	13031000	12907000	3474700
AIAELIPYEVPNIEK	15	1697.92	66.486	116060000	120830000	105390000	12393000	0	66316000	10470000	8693200	4960500
AIAFDFR	7	838.434	96.048	22243000	14269000	9863700	19907000	0	0	0	0	0
AIAIAASK	8	743.454	67.981	0	0	22125000	0	0	0	0	67677000	0
AIAIMSHPIPNTNDSHSVQVILPQK	25	2709.43	37.228	223870000	227670000	151820000	78786000	64835000	0	44417000	36766000	16364000
AIALTLGK	8	785.501	72.138	0	0	0	0	6331100	0	5167100	6923500	3921000
AIALTVDTPR	10	1055.6	128.69	124170000	70264000	110930000	226120000	142080000	438680000	566760000	839640000	197510000
AIASNIDANFLK	12	1275.68	111.46	158630000	0	0	0	0	0	0	0	0
AIATWEVR	8	944.508	79.116	5508800	5837300	5052600	3030300	0	0	0	0	0
AIAVAEVEPLVK	12	1237.73	60.518	0	17089000	0	0	0	0	0	0	0
AICIVHNETATGVTNNLAK	19	2025.03	77.027	0	0	0	0	0	0	0	0	0
AIDEAIEWLDR	11	1329.66	62.823	0	0	0	0	0	0	2083300	4438400	10951000
AIDEYASLR	9	1036.52	60.589	17548000	26008000	18308000	8399300	0	14257000	0	0	0
AIDLILSK	8	871.538	107.9	0	0	0	0	0	16144000	0	0	0
AIDLSPK	7	742.423	50.966	0	0	0	0	0	0	4191600	0	0
AIDLVDEAAAK	11	1114.59	91.867	33242000	34370000	11731000	44055000	0	31739000	44517000	45657000	78634000
AIDLVDEAGSR	11	1144.57	86.898	70232000	78213000	33862000	51511000	2563600	87870000	96386000	122030000	56019000
AIDTLPVTAHPMTQFASGVMALQVQSEFQK	30	3244.63	44.931	0	0	0	0	0	0	0	0	11967000
AIDVIPLLTPAVLEK	15	1590.96	88.021	0	0	0	0	0	0	90384000	116800000	39986000
AIDVIPLLTPEVLEK	15	1648.97	80.245	0	0	0	0	0	0	87701000	120810000	11525000
AIEAADGGASFK	12	1135.55	78.655	6179900	7302200	1571000	2708800	0	6593300	5702500	5634100	1365100
AIEAADGGASFKEDVWSRPGGGGGISR	27	2646.28	111.4	55317000	0	43874000	0	0	0	0	0	0
AIEAEGIPYTYVSSNLFAGYFLPTLAQPGATAPPR	35	3681.87	16.068	0	0	0	0	0	0	77102000	0	0
AIEANDGKPLPLYQK	15	1655.89	74.162	39780000	39237000	33966000	48311000	10014000	44318000	99888000	177370000	60000000
AIEDEIKK	8	944.518	34.089	2848000	2966400	1296000	1190500	0	0	3435400	0	0
AIEDGVDVLDCPVQMSK	17	1874.88	85.522	10261000	28488000	37206000	0	0	0	14591000	14261000	7314600
AIEEAASK	8	817.418	82.671	28139000	16822000	22339000	13494000	0	25185000	0	0	0
AIEEGTDFIETDILSSK	17	1866.91	46.069	0	0	0	0	0	0	8154300	11912000	3137000
AIEETMEGSGASVR	14	1435.66	42.001	0	5130600	2903000	0	0	0	0	0	0
AIELLSGK	8	829.491	68.787	6791900	10375000	0	0	0	0	0	0	0
AIELPDAMENAGAALIR	17	1753.9	209.19	2450800000	2304400000	1949500000	1209500000	617790000	717970000	364520000	510840000	318260000
AIELTEQAGTK	11	1159.61	72.928	0	0	0	0	0	0	14938000	25732000	15862000
AIESGLNINLIQLK	14	1524.89	76.228	0	0	0	0	0	0	25681000	0	9238100
AIFALRDPTQEDPREVAAAK	20	2197.15	24.3	13589000	39126000	75848000	31120000	0	0	0	0	0
AIFASGSPFDPIEYNGK	17	1811.87	229	56579000	69733000	65286000	57404000	67784000	79979000	67559000	47015000	16787000
AIFGLHVAPDVPVGVVGSR	19	1889.05	54.974	0	0	0	0	0	0	11356000	9335600	2153300
AIFNKEEDIGTYTIR	15	1768.9	191.79	61703000	198520000	248490000	158220000	199120000	263960000	156050000	160540000	71693000
AIFPDASIVVTR	12	1287.72	76.143	0	0	0	0	0	0	11741000	22102000	3438100
AIFSFIVPDQR	11	1291.69	153.24	324000000	217880000	259100000	135700000	0	0	59752000	67450000	29298000
AIFVDLEPTVIDEVR	15	1714.91	254.34	429350000	403920000	232150000	199810000	0	0	111320000	127510000	29540000
AIGAPGHGAK	10	877.477	53.891	4026400	3299600	3023900	1226800	0	0	0	0	0
AIGDPMFFR	9	1052.51	160.91	65691000	55921000	64258000	0	9517900	35315000	0	0	0
AIGEESVTR	9	960.488	49.96	8987800	9015000	5539900	0	0	0	0	0	0
AIGELAK	7	700.412	76.847	0	0	0	0	0	0	0	0	0
AIGENGFR	8	862.43	68.485	3421700	2883800	3425300	4712900	5496300	2085000	0	0	0
AIGFFGTR	8	867.46	102.71	5389500	5708200	4602700	9376400	23761000	0	17315000	23336000	4126000
AIGFIDMMIDYSLENAPLQK	20	2268.12	17.595	0	0	0	0	19231000	0	0	0	0
AIGGMTGGGK	10	847.422	43.772	0	0	0	0	0	0	0	0	0
AIGLTNQR	8	871.488	88.029	17331000	15086000	14676000	5588100	7153300	9917600	18315000	0	1229300
AIGQIELDLPEAPEK	15	1621.86	107.18	170570000	192120000	128010000	60286000	11451000	119050000	28346000	28650000	11019000
AIGSGSEGADSSLQEQYNK	19	1939.88	103.88	12108000	16506000	1736700	3965900	0	10158000	15024000	19723000	3050900
AIGSGSEGADSSLQEQYNKDLTLK	24	2510.21	178.41	95384000	83283000	27722000	36028000	0	0	15455000	19202000	9755000
AIGTEIEWLPGK	12	1312.7	89.247	34741000	44297000	29423000	0	0	0	0	8234000	0
AIGVEVNK	8	828.471	94.163	160400000	210970000	162060000	42830000	56474000	95124000	153930000	152670000	65126000
AIGVQQSR	8	857.472	79.451	0	25332000	22214000	2503200	4669100	18488000	76162000	0	46639000
AIGVSNFSTK	10	1022.54	48.423	5294800	5201100	6363300	0	2284700	0	0	0	0
AIIAGATAPQSK	12	1126.63	78.655	6815700	7242000	7310100	4128900	5279800	14292000	0	0	0
AIILGFNNK	9	988.571	90.706	0	0	0	0	0	0	0	27176000	2488500
AIILKEDVPALGTK	14	1466.87	134.98	55046000	44690000	103140000	48400000	31081000	18841000	11697000	15459000	7600100
AIIPESVLK	9	968.591	68.214	30363000	27339000	20393000	0	8670000	27967000	0	0	0
AIKPTVLIGSSGVGR	15	1453.86	55.335	10858000	6646300	0	0	44117000	0	19639000	18237000	3035400
AILETTLR	8	915.539	91.906	5441600	7746700	6483700	4196300	0	0	0	0	0
AILGGHVR	8	821.487	65.263	0	0	0	0	0	0	0	0	0
AILGNQALR	9	954.561	94.407	6385300	7968200	6622900	1898700	3195200	4901900	3704700	4994200	1361200
AILLDYDGTLVPQTSINK	18	1960.05	37.426	0	0	0	0	0	0	4928600	3322400	1866000
AILNLSLR	8	898.56	158.12	479060000	419820000	257750000	908280000	449430000	1148800000	346100000	644850000	82226000
AILPVNGEISVDSVVVER	18	1895.04	58.487	0	0	0	0	0	0	6040100	6233900	3967100
AILSEFVEIPAENR	14	1586.83	118.28	0	0	0	0	0	21996000	36964000	51756000	7987400
AILSEFVEIPAENRVPPAVPTPVTV	25	2644.45	59.163	0	34649000	45874000	79712000	0	0	80741000	0	111650000
AILSPEQFHILR	12	1422.8	72.652	0	0	0	0	0	0	20733000	24143000	6922600
AILVEGLK	8	841.527	60.76	10748000	9023100	9734100	5181000	4837600	11259000	0	0	0
AIMAIGVDEEPNKETLTK	18	1958	76.151	0	12511000	10647000	0	0	0	0	0	0
AIMANAGSSLMGIGTATGK	19	1749.88	167.98	102400000	90432000	97786000	53080000	54328000	0	15861000	17223000	0
AIMINTPHNPTGK	13	1392.72	41.825	10164000	11056000	9411000	6482200	7093000	8278400	0	0	0
AIMLELSR	8	931.516	108.09	0	0	0	14459000	0	36302000	0	0	0
AIMLVELKK	9	1043.64	35.511	3389700	5847400	3451300	0	0	0	0	0	0
AINDEGMPMYQRPFMK	16	1926.88	33.823	18859000	35167000	53743000	0	0	0	0	0	0
AIPNQQIITK	10	1124.66	99.802	9882500	12383000	9490400	4118200	8296200	7178900	6863000	5458700	3895700
AIQDTQR	7	830.425	84.359	10589000	4491700	8626600	16587000	12482000	20948000	0	0	0
AIQNYIDGTK	10	1121.57	48.423	6178900	7260200	0	0	0	0	0	0	0
AIQSNLNPLFK	11	1243.69	56.563	0	0	0	0	0	27462000	8960600	0	3130200
AIQTVYVPGWR	11	1288.69	61.679	0	0	0	0	0	0	6136400	7893100	3553300
AIQTYYEAYNSNVHR	15	1827.85	77.776	0	1149700	0	10905000	31503000	33731000	23711000	30123000	10520000
AISAQTPDILGDR	13	1355.7	129.16	0	0	0	0	0	0	6272300	8336900	2442800
AISEGWLDASFVK	13	1421.72	97.813	46737000	30700000	34462000	0	0	0	3794100	5722300	3475900
AISGGPIYVSDSVGSHNFK	19	1933.95	13.832	0	0	0	0	0	159160000	47059000	90818000	16302000
AISGQPPLR	9	937.535	67.032	25069000	28123000	14313000	33952000	19091000	46338000	57579000	111910000	45992000
AISGVQTVR	9	929.529	71.379	22828000	31228000	17546000	10018000	9068100	16191000	41358000	36483000	19442000
AISNNFATLMR	11	1236.63	103.55	123170000	121770000	129710000	121090000	10842000	218520000	65845000	61283000	31005000
AISSSNAYNDQFR	13	1471.67	130.94	24956000	31145000	17974000	7679000	0	13704000	32501000	16228000	8529600
AISSSNAYNDQFRELVQSGK	20	2213.07	33.667	0	0	83783000	0	0	0	0	0	0
AISTEDAK	8	833.413	71.296	19397000	19724000	19704000	1643700	0	0	0	0	0
AISTFGLANQIK	12	1261.7	116.37	61692000	86397000	16176000	0	0	0	24534000	17540000	5050300
AISVSDPIVSVNWLHENLKDPNLK	24	2687.43	91.238	92841000	97652000	49148000	45996000	0	0	6350700	6895500	0
AISVTSTAK	9	876.492	56.659	8272200	8533800	5845700	0	2840400	0	0	0	0
AISVVAGIEAR	11	1084.62	63.184	9616000	3640100	2446800	0	0	0	3943000	0	0
AISVVGNSLSK	11	1073.61	81.525	0	0	0	0	0	0	41714000	32287000	22516000
AITELEVAR	9	1000.56	51.059	0	0	0	0	0	0	0	0	0
AITELNGVTNR	11	1186.63	136.57	12585000	15785000	12133000	2256500	0	16433000	22224000	24415000	5816700
AITLGEVINSK	11	1143.65	109.29	15207000	0	20408000	7876800	0	0	5677600	5332700	2509800
AITLNTGFK	9	963.539	104.75	0	0	0	0	32220000	35720000	25155000	17504000	9749300
AITSAYYR	8	943.476	74.415	82178000	108760000	71449000	25904000	0	56881000	0	0	0
AITSLQENFKPHR	13	1539.82	28.361	17765000	13743000	13277000	11503000	7830200	0	0	0	0
AITSTDKFEMWGDGLQTR	18	2054.97	47.204	84262000	0	0	0	1674900	0	8873800	12777000	3514000
AITVDAQAVQR	11	1170.64	122.19	13663000	11193000	0	0	0	0	0	0	0
AIVGATLEVIQK	12	1240.74	125.56	548260000	570130000	301960000	43506000	42253000	53919000	19945000	28116000	15713000
AIVGATLEVIQKR	13	1396.84	63.76	0	0	25793000	0	0	0	0	0	0
AIVINGQR	8	869.508	95.957	0	2013300	2830200	0	10245000	0	0	0	13365000
AIVITGAK	8	771.485	62.659	10096000	8257200	7551600	6557800	8103100	8094300	12794000	10606000	8290800
AIVLTGK	7	700.448	77.374	0	0	0	0	11481000	9026100	21989000	24030000	11130000
AIVNVIGMTK	10	1044.6	53.756	14023000	12630000	7259700	5057000	0	0	0	1556600	0
AIVQFEDFQMK	11	1354.66	128.38	75487000	59689000	47881000	35313000	43319000	50712000	26874000	26416000	0
AIVSSDLGMTPNNDGDVIR	19	1972.95	243.88	225790000	139100000	189530000	157160000	300650000	207570000	71563000	60883000	46650000
AIVVTQR	7	785.476	111.69	25966000	41259000	30449000	8552300	23296000	0	0	0	0
AIVVVGDK	8	799.48	60.788	0	0	0	0	12345000	15782000	0	3250600	3198300
AIWLADSK	8	902.486	90.777	26852000	37329000	31500000	18300000	13465000	27252000	0	0	0
AIYHATFR	8	977.508	65.676	0	0	0	0	0	12747000	29719000	29999000	15273000
AIYYLATDSLK	11	1256.67	120.12	411520000	465880000	415320000	238590000	230580000	327880000	104590000	155190000	69598000
AKADAAEYQK	10	1093.54	81.972	96358000	147340000	161910000	18891000	0	32684000	0	0	0
AKANSLAQLGK	11	1099.63	82.287	0	0	0	0	0	0	22628000	26498000	0
AKANSLAQLGKYTGEGESEEAK	22	2280.12	17.998	0	0	0	0	0	0	4426800	4919500	0
AKDFLFISGTK	11	1225.67	54.199	3421600	3249200	6361700	0	15313000	991910	7289500	0	0
AKDVEVVEGGEFQAK	15	1604.8	153.74	0	0	0	0	0	0	102590000	89430000	7010600
AKDWTQGELR	10	1202.6	31.425	5319400	5855800	4288700	3279700	0	0	7254900	6391100	0
AKEDLVIQSHDASFK	15	1686.86	74.141	14004000	13665000	9216100	45733000	12332000	0	97102000	85557000	39673000
AKEEQLSLLNK	11	1271.71	153.97	0	0	0	9579800	2318800	9998200	42137000	49422000	4386200
AKELLGWEPK	10	1169.64	31.068	7532700	10916000	11104000	3118500	9587100	0	0	0	0
AKEVIAAVQK	10	1055.63	82.279	18184000	18521000	33651000	12519000	0	0	28509000	48831000	15793000
AKFEPQLLGAK	11	1200.69	34.695	4176800	6723600	5016300	2360900	0	0	0	0	0
AKGVSLLLPSDVVIADK	17	1724.01	58.712	0	0	0	0	35201000	0	15938000	22571000	5743600
AKLDPLGLEER	11	1239.68	64.297	0	0	0	0	0	18456000	16866000	12895000	5538400
AKMELSSLTQTNISLPFITATADGPK	26	2733.43	95.519	180140000	127440000	95994000	82093000	0	0	48533000	74259000	22519000
AKPAAAVSPVDEELAK	16	1594.86	113.07	629900000	361840000	490970000	1319700000	499140000	1746200000	2615500000	2588800000	1524500000
AKPAAAVSPVDEELAKWYGPDR	22	2369.2	53.266	0	0	0	0	131280000	0	0	0	14123000
AKPAVPIGGSYR	12	1214.68	42.466	0	0	0	0	0	20863000	35515000	53811000	0
AKPAVPLGANYR	12	1255.7	36.955	6787000	6462800	1794600	13946000	0	0	29323000	40025000	4874800
AKPVSIEVWNPNGK	14	1537.83	145.46	73307000	52749000	119200000	206960000	0	313040000	121870000	185260000	32796000
AKQELDGFEK	10	1163.58	34.773	0	0	0	0	0	7029500	0	0	0
AKSEATNYESVYGEAIPVK	19	2055.02	13.317	100600000	92235000	59625000	82374000	0	0	0	0	0
AKVFDIDLQK	10	1175.65	26.116	0	0	3039900	0	0	0	0	0	0
ALAAAGAEILVGTWVPALNIFESSLR	26	2668.46	120.64	0	15260000	9352100	15837000	0	0	0	0	0
ALAAEMAPNTR	11	1143.57	87.308	9921900	10492000	9657700	0	6631500	0	0	0	0
ALAALFVHTPAGELQR	16	1692.93	46.319	21253000	20757000	22179000	28270000	0	0	18626000	18939000	2646800
ALAAQEAAR	9	899.482	82.452	13851000	9939100	6362500	5111100	15130000	28250000	0	0	0
ALAAVQALLLNQGPSR	16	1620.93	136.33	46166000	53053000	30907000	12516000	0	0	6530400	9330300	0
ALAAYYFGSEDAMIR	15	1676.79	91.937	0	73247000	0	0	0	0	26977000	34713000	19519000
ALADKANEAFYK	12	1339.68	31.148	0	0	0	0	0	0	12957000	0	12286000
ALADKQSAVEAQANSVR	17	1756.91	58.246	0	0	22880000	3845800	0	0	5951500	4732100	5119900
ALADYVHSK	9	1002.51	91.318	54044000	43698000	50603000	30786000	34555000	53733000	87597000	91155000	65990000
ALAEALNER	9	985.519	119.41	3881500	0	0	5435100	4032100	8733800	14651000	18182000	8328700
ALAEISPYTTPQDSR	15	1647.81	105.46	12487000	19141000	9037900	4847200	18406000	25593000	10001000	10284000	4918600
ALAENEGEGLAK	12	1200.6	120.31	29172000	32683000	25278000	9481800	15050000	18288000	16397000	28305000	7707400
ALAEQLFDDENLLVR	15	1744.9	208.46	305740000	312270000	130670000	178250000	0	0	37684000	60296000	75861000
ALAFLGHEGTHR	12	1307.67	65.179	0	0	1059200	4797300	0	0	24318000	22805000	7442800
ALAGQKDEAFFTANAGAQASR	21	2123.04	77.959	92140000	70725000	65747000	4514000	49947000	0	36648000	33211000	13972000
ALAIYSPHEGGYEGR	15	1618.77	28.812	12645000	0	0	9337800	3597900	0	16560000	27023000	6639500
ALALGASGIFIGR	13	1244.72	152.28	356640000	190220000	69288000	433670000	125760000	408790000	157810000	282960000	36239000
ALALQWR	7	856.492	97.64	8710000	10046000	7575400	5284500	0	0	0	0	0
ALASEHNFDLQAFR	14	1617.79	17.069	0	0	0	0	0	0	0	5900400	0
ALASGADATQQALLK	15	1456.79	103.34	7864800	10593000	7684000	3479400	0	7166000	11190000	8177000	3234700
ALASHPMK	8	853.448	66.993	0	0	0	0	0	0	0	0	4421300
ALASYLFNTEEALVR	15	1695.88	165.66	0	0	0	0	0	0	0	0	508640000
ALASYLFNTENALVR	15	1680.88	111.52	21098000	34125000	18237000	12726000	0	0	0	0	0
ALATHGTPVQNR	12	1263.67	176.79	7897800	15832000	9828700	5145700	10638000	17675000	61780000	105390000	0
ALAVVDMEPEPAAEK	15	1568.78	101.95	20114000	0	7756300	29407000	6888700	67596000	22334000	28365000	13424000
ALAYGQALGGGYSR	14	1382.69	51.092	5094000	5132200	3703100	0	0	0	5483400	6230700	0
ALDAFHLDTK	10	1129.58	25.238	0	0	0	0	0	0	6688000	7227200	1597000
ALDDTVITGVPTTIEYHK	18	1972.02	111.79	357040000	444240000	277970000	83860000	74507000	136440000	17004000	37820000	8921500
ALDDYNVGDQVTLK	14	1549.76	113.22	34806000	39800000	41153000	20909000	0	48451000	0	0	0
ALDEAQR	7	801.398	80.555	11254000	16074000	10764000	15852000	10122000	12890000	0	0	0
ALDEHLK	7	824.439	81.381	0	0	0	0	55076000	0	56778000	75786000	18135000
ALDELVSSPGFGK	13	1318.68	77.358	19285000	0	0	0	41058000	0	0	0	0
ALDFRPK	7	845.476	118.69	0	0	0	0	0	0	25417000	42459000	11799000
ALDIGEDPAALPK	13	1308.69	72.434	0	0	0	0	42627000	0	0	10992000	5436500
ALDILSDILQNSKFDEHR	18	2113.08	65.949	0	0	7820200	0	0	0	0	0	0
ALDKELSSDFER	12	1408.68	111.86	115990000	74905000	75820000	30683000	208100000	174510000	17481000	15749000	11092000
ALDLDISPVVIR	12	1309.76	98.048	43736000	25860000	26402000	14105000	0	0	8476100	8107600	1519500
ALDLPVYFGDAGSR	14	1479.74	51.092	0	0	0	0	0	0	4542000	5899500	3349300
ALDMLNFTPLNGKPIR	16	1798.98	52.823	0	0	47340000	0	28782000	0	9003600	6970600	2875300
ALDMNAAEDAIVR	13	1387.68	152.07	334610000	369840000	308840000	166580000	216040000	250190000	137740000	128970000	29057000
ALDNYHAK	8	930.456	85.359	23361000	35054000	27598000	14061000	0	0	25996000	22449000	13410000
ALDPAFQGAGQR	12	1229.62	88.948	14907000	18642000	12760000	4418000	9833900	10248000	10466000	0	5462900
ALDSITEVVQTVK	13	1401.77	69.721	0	0	0	0	0	0	10950000	9369200	2436900
ALDVLNFTPLNNKPIR	16	1824.03	104.17	85135000	88416000	59584000	28565000	0	0	18622000	25606000	4889700
ALDWAVDQK	9	1044.52	69.423	21615000	20077000	22242000	12043000	0	16743000	0	0	0
ALDWGPGGGPDLIVDDGGDATLLIHEGVK	29	2886.44	100.41	323510000	412420000	112860000	0	0	0	299660000	224220000	27013000
ALDWGPGGGPDLIVDDGGDATLLIHEGVKAEEIYEK	36	3748.85	19.406	150980000	0	0	0	0	0	0	0	0
ALDYALR	7	820.444	97.64	3500600	3979600	3224800	0	0	0	0	0	0
ALDYESINENVK	12	1393.67	108.67	30916000	30738000	1391600	72442000	137960000	416090000	188770000	263830000	61265000
ALDYESINENVKK	13	1521.77	96.015	26768000	14954000	39066000	56198000	33353000	0	107720000	108280000	45111000
ALEALKPELK	10	1110.66	118.18	13616000	22208000	9233200	8579600	0	13587000	15417000	21299000	6977200
ALEATNMSK	9	963.47	69.423	20228000	27717000	21938000	3466200	6051100	8783700	0	0	0
ALEAVIGHLR	10	1077.63	64.04	3534100	6817400	2549900	0	0	0	0	0	0
ALEDAAAPLVTFLQNPAAVQELR	23	2436.3	66.467	0	0	0	0	0	0	20974000	51667000	0
ALEDAIAALDK	11	1128.6	86.882	0	0	0	0	0	0	14417000	12455000	5833000
ALEEAITAK	9	944.518	26.442	0	0	0	0	0	0	0	4652900	0
ALEFIGAGAK	10	975.539	68.383	0	0	0	0	0	0	4597300	3687000	2682200
ALEIAEK	7	772.433	89.369	39518000	48920000	32944000	14806000	0	19512000	74696000	81312000	0
ALEIDPNNMNVK	12	1356.67	92.062	45065000	74587000	16957000	15144000	0	5151500	3498200	5114300	2301100
ALELVVSENK	10	1100.61	69.423	67659000	55879000	47563000	22749000	126710000	118500000	65840000	76071000	24862000
ALENEMLHR	9	1111.54	129.4	7444700	13298000	5483000	909020	0	0	0	0	0
ALENLQTQNGDQK	13	1457.71	67.563	4441300	6554600	4148600	4386700	5168400	4968200	7887200	6604600	5492900
ALEQQEAAR	9	1014.51	85.064	7559900	7118100	5904100	5101800	6194700	10593000	9603000	20221000	5104800
ALESAVDDLELMGR	14	1517.74	70.195	0	0	0	0	0	0	0	8885800	0
ALESMMGDEK	10	1109.47	51.066	0	0	0	2921400	0	2804000	0	0	0
ALESSLSPIVIFATNR	16	1716.94	52.693	0	0	0	0	0	0	4851600	6733900	2559800
ALETLSGAVFQRPPLISAVK	20	2096.2	111.62	89625000	139640000	60940000	19158000	0	0	0	0	0
ALETYEIPGVVEDYRR	16	1908.96	84.046	31989000	42519000	36083000	0	0	0	0	0	0
ALEVIHGR	8	893.508	119.57	0	42244000	0	103550000	0	0	438250000	364970000	186350000
ALEVIPR	7	796.481	99.919	22063000	30857000	20277000	7021600	265020	0	0	0	9992300
ALEVIQFLK	9	1059.63	91.9	49500000	50821000	36965000	23023000	0	0	6948000	9867800	0
ALEVVEELR	9	1056.58	91.318	0	20879000	12665000	0	0	0	0	0	0
ALEVVQYIK	9	1061.61	102.72	0	0	0	0	0	0	6345100	9211400	2271600
ALEYEDFDKFDR	12	1546.69	77.597	174820000	231400000	163380000	126490000	0	178140000	9424200	12300000	3474900
ALFDIPVAR	9	1000.57	104.21	82586000	92818000	59197000	140100000	15727000	66048000	23717000	26897000	31155000
ALFNHLK	7	841.481	91.093	0	0	0	0	0	0	76654000	71907000	0
ALFPHPEEMQR	11	1353.65	47.288	17912000	24198000	18263000	6036100	17215000	16691000	0	0	0
ALGDYLGVK	9	934.512	73.26	76991000	84836000	33349000	0	122410000	204350000	0	0	22430000
ALGGHIIGSDK	11	1066.58	37.343	0	0	0	0	0	0	31608000	23395000	12685000
ALGGHIIGSDKR	12	1222.68	86.624	45007000	32252000	33858000	41326000	21208000	11796000	108940000	87754000	61109000
ALGIYTDAEEK	11	1208.59	93.111	0	0	0	0	0	0	0	0	0
ALGLPLERPK	10	1092.67	76.1	0	26779000	0	0	19914000	17198000	76367000	50828000	28770000
ALGLQPR	7	753.45	126.05	50406000	42640000	34060000	33199000	51094000	61842000	101010000	89336000	40569000
ALGLQSLPVAFGAETAK	17	1671.92	96.756	27524000	25312000	17700000	24199000	0	0	12211000	17380000	7070700
ALGMSVVK	8	803.458	65.252	72677000	52514000	45933000	37575000	34611000	54384000	101170000	130780000	64134000
ALGNPPCNPGR	11	1151.55	107.9	15403000	6766500	11540000	6013600	6509100	16640000	99597000	36423000	32592000
ALGQISER	8	872.472	124.83	216530000	231380000	244920000	133660000	211060000	284660000	375700000	392020000	317910000
ALGSIGAGTTPGR	13	1156.62	94.616	63878000	40939000	50937000	52280000	64730000	76080000	54473000	87380000	32921000
ALGSMPGVYR	10	1049.53	110.81	0	0	0	6901500	0	10921000	18658000	15188000	5880900
ALGVDILTGVGTILGPHK	18	1760.02	27.149	0	61153000	17300000	61658000	0	0	0	0	0
ALGVEEDMAHTSIR	14	1527.74	39.509	5967500	0	5118200	5875100	0	0	0	15972000	6720700
ALGVETVPVLVGPVSYLLLSK	21	2153.27	125.28	370820000	55884000	31092000	86856000	0	244160000	80806000	64088000	10551000
ALHDSLSIVK	10	1081.61	77.192	27083000	23822000	19125000	6889000	6397300	0	8285600	12221000	7196400
ALHTNFNAR	9	1042.53	27.627	4552200	5068400	3026300	3338300	0	0	0	0	0
ALHTQGVLK	9	965.566	43.083	9063600	11867000	8251800	5550600	0	0	0	0	0
ALIASIK	7	714.464	86.866	2067400	1456700	0	0	0	9270200	0	0	0
ALIEEAENER	10	1172.57	66.621	0	0	0	0	0	0	0	0	0
ALIEPEEK	8	927.491	72.138	28710000	27817000	15385000	7646500	15044000	26590000	14255000	14141000	6523900
ALIFIKDTTLQPLIDGSTNR	20	2215.22	116.96	0	51523000	569320000	26984000	0	0	0	0	0
ALIGEGSYGR	10	1021.52	57.59	0	7370300	5371200	0	4171100	4690200	0	0	0
ALIKPIMESTYGK	13	1449.79	25.718	0	0	0	0	0	0	0	4364200	1988800
ALIKPLQQVVANSLR	15	1649	47.506	0	0	0	0	20989000	0	6745800	14356000	3903700
ALIPDLYR	8	959.544	84.244	0	0	0	0	96451000	100590000	22347000	22021000	12411000
ALIPSLFVGR	10	1071.64	125.81	250170000	0	7995900	81919000	0	0	0	0	383160000
ALIPTDLSIAVPEGTYAR	18	1886.01	140.16	118850000	149950000	144630000	0	0	0	0	0	0
ALIQQEYR	8	1019.54	105.39	0	22490000	20481000	0	12897000	10985000	0	0	0
ALIQVVR	7	797.512	83.229	13678000	18193000	15204000	4691100	0	6031700	0	0	0
ALKNPIELDGLK	12	1309.76	89.301	11925000	0	13432000	0	15074000	0	0	0	0
ALLALKTEER	10	1142.67	32.329	0	0	4317300	0	0	0	0	0	0
ALLAVSGR	8	785.476	58.604	0	0	0	0	0	0	0	0	0
ALLDDAAHEPGGK	13	1292.64	63.662	0	4575200	1331700	8272800	0	9742600	14469000	33241000	15115000
ALLDELMGAAR	11	1158.61	46.158	0	0	0	0	0	0	0	0	0
ALLDVGLIQTTTGNR	15	1570.87	153.34	709350000	726160000	573590000	163270000	334500000	453330000	89898000	98843000	45857000
ALLEADVSLPVVR	13	1380.8	123.63	71818000	56770000	0	43242000	0	42964000	10613000	19113000	2341700
ALLEDPIFRPLVEK	14	1638.93	71.879	144300000	95074000	94993000	74598000	66578000	55992000	22204000	37417000	45560000
ALLEGTEAYDK	11	1208.59	43.512	0	0	0	0	0	0	0	0	0
ALLHSSHMYHEAK	13	1522.74	39.424	15235000	17496000	11348000	13267000	12076000	0	32047000	27454000	12799000
ALLINGQR	8	883.524	91.584	5024100	3427300	6644500	6291700	15959000	19472000	0	0	0
ALLISMGEALR	11	1172.66	144.09	39008000	224830000	0	744720000	268070000	464640000	222360000	292610000	74903000
ALLMAGPPGTGK	12	1111.61	63.816	11367000	9456900	8630800	0	3420800	6518900	0	0	0
ALLNSDLIGFHTFDYAR	17	1951.98	50.608	0	0	0	0	0	0	3703200	5810500	1627800
ALLQSDVHSK	10	1096.59	32.329	9613200	9997200	8050300	3666000	0	0	0	0	0
ALLSTTSSDGAAILR	15	1474.8	49.5	0	0	0	0	0	17509000	2655900	2821100	0
ALMDEMAVIATK	12	1291.65	94.616	0	51964000	40266000	62402000	0	57936000	36710000	41155000	10359000
ALMDEMAVVATEEYR	15	1726.79	63.408	0	0	0	0	0	0	8791800	4189200	1550700
ALMEEEGEER	10	1191.51	55.549	0	0	0	0	0	0	4095400	5992000	877370
ALMEEEGEEREK	12	1448.65	46.358	0	0	0	0	4882500	0	0	0	0
ALMLNDR	7	831.427	58.167	0	1605000	1931900	0	0	0	19043000	0	12063000
ALNAMNLDMDIK	12	1347.65	83	0	0	0	0	0	0	0	0	0
ALNDHHVLLEGTLLKPNMVTPGSDSK	26	2785.44	119.36	379680000	361160000	46131000	0	0	62097000	0	0	7968800
ALNDHHVLLEGTLLKPNMVTPGSDSPK	27	2882.5	107.65	89933000	0	0	481190000	0	196540000	567560000	671220000	138880000
ALNDHHVLLEGTLLKPNMVTPGSEAK	26	2783.46	107.65	225900000	253810000	456600000	54315000	0	0	99085000	110550000	38350000
ALNEAGVGDSIK	12	1172.6	107.21	0	0	6562500	3348000	5022400	5200100	8288600	3057400	3664400
ALNEEPEQYR	10	1247.58	81.548	53362000	43806000	15200000	30408000	21727000	54859000	60226000	89807000	27050000
ALNEEPEQYRIDSQKLEEWAR	21	2603.26	45.369	0	0	0	0	0	0	15963000	10858000	17854000
ALNIVWGADTR	11	1214.64	89.247	0	0	0	0	0	0	6569800	8219100	3433100
ALNLGVNVK	9	926.555	81.784	25569000	34997000	20097000	16655000	19388000	36750000	50686000	35016000	23061000
ALNPGLVYDAGAADYIR	17	1777.9	44.616	0	0	0	0	0	0	6328200	0	0
ALNSVASR	8	816.445	108.46	16844000	20814000	19591000	23210000	0	32628000	118740000	151710000	33839000
ALNYLFTNVDR	11	1324.68	99.653	0	8975800	0	0	46241000	0	26492000	22830000	4849000
ALPEDVIAGWR	11	1225.65	99.136	0	0	0	0	0	0	28659000	33911000	9984900
ALPTYTPESPADATR	15	1588.77	68.44	163720000	201750000	137300000	254450000	303590000	515740000	577940000	757080000	242140000
ALPYVDYVFGNETEAR	16	1842.88	116.24	119220000	105990000	100920000	31672000	0	0	13407000	12893000	5445600
ALQAGEQLVR	10	1083.6	111.95	27077000	34391000	26969000	12943000	19907000	24994000	34140000	32887000	16283000
ALQAGTSHNLGQNFSR	16	1699.84	43.557	19226000	19048000	23416000	15044000	0	22685000	26295000	35235000	11253000
ALQESLASELAAR	13	1357.72	128.68	47728000	26312000	707960000	1436100000	1113700000	1640900000	458420000	800540000	259170000
ALQGSLDSGK	10	974.503	88.819	8370200	7841600	8438700	0	5083200	4649400	0	0	0
ALQHYTELPDIKR	13	1582.85	82.202	10163000	11555000	10618000	4182500	22682000	77898000	25959000	28755000	8665300
ALQIYIEHR	9	1141.62	81.548	3013600	0	0	8426600	0	5478800	33185000	12304000	0
ALQLPEYPDAAEVESVVK	18	1957	52.344	0	0	0	0	0	0	8616200	5512300	0
ALQLWETLK	9	1100.62	84.498	9741900	0	0	15048000	0	0	13652000	14177000	2718600
ALQNSVLK	8	871.513	81.297	20778000	19406000	19450000	0	0	7085600	0	2622200	0
ALQPIFQIYGR	11	1304.72	105.57	0	128660000	0	122260000	179580000	0	55309000	58403000	17283000
ALQPLAVAEGSEDK	14	1426.73	77.062	7545700	8099200	3261700	5728500	0	33987000	23417000	22691000	8233800
ALQPLLNAR	9	994.592	85.265	0	12977000	12292000	4130700	0	4946200	0	0	0
ALQQSTLK	8	887.508	113.7	262480000	316000000	248010000	272870000	307380000	305190000	1247000000	1449100000	561540000
ALQSEINIEDVQK	13	1485.77	52.79	13496000	0	0	4858600	0	0	0	0	0
ALQTYNGALMPNTDQNFR	18	2052.97	132.06	39188000	38850000	25301000	14555000	0	0	0	0	0
ALRLDTGNYSWGSEAVTR	18	1994.98	103.75	0	0	57655000	0	0	0	0	0	0
ALRLEDLR	8	984.572	119.29	841320000	580800000	3797200000	2509100000	1303200000	659530000	3086400000	2778600000	3720900000
ALRPYFELTNAVR	13	1548.84	95.417	0	0	0	0	0	0	0	0	0
ALSAGSNGEGGR	12	1074.51	93.556	18349000	12365000	20076000	0	7418200	8851900	0	0	6619500
ALSDVVQNLSK	11	1172.64	196.32	44111000	0	33296000	44428000	0	0	20125000	16133000	9297700
ALSEQTNAAR	10	1059.53	77.732	2288200	2807600	3201800	1697500	2285800	2027500	3398800	6823500	1859600
ALSETGGDIEK	11	1118.55	103.55	11208000	12509000	3827400	11613000	7526200	23633000	29856000	27458000	7381600
ALSETGGDIVK	11	1088.57	84.615	12874000	13914000	9181800	20084000	8093500	16248000	20089000	21791000	8994400
ALSEVSGIPLPYDSLGAIR	19	1957.05	119.62	34537000	37821000	29417000	27801000	0	0	20558000	16810000	7231000
ALSHEETLEIPK	12	1365.71	50.467	13684000	16556000	13046000	10612000	0	15335000	11612000	14715000	9389900
ALSHSFTVFAR	11	1234.65	84.896	8601200	12668000	5611900	4478200	16209000	0	7116100	10323000	2507500
ALSIVQGR	8	842.497	95.793	173620000	95325000	123360000	552190000	298310000	963230000	1518000000	1159000000	564350000
ALSLPTGIGIVCASPK	16	1582.88	57.164	0	0	39898000	21131000	0	0	0	0	0
ALSPEVLQASFNVGSDVEK	19	1989.01	43.03	0	0	0	0	0	0	7414900	11049000	2783600
ALSQSDGR	8	832.404	107.67	46757000	52932000	31309000	10811000	23393000	42862000	0	0	0
ALSREEQQTSSK	12	1362.67	42.083	0	0	9512800	0	0	0	0	0	0
ALSSPVLSAVGER	13	1284.7	113.63	0	0	0	0	0	0	0	0	0
ALSSQHQIR	9	1038.56	100.45	354230000	376820000	180880000	74364000	66097000	37529000	119760000	92043000	46500000
ALSSQHQVR	9	1024.54	49.96	19097000	13906000	15510000	5853300	0	11033000	0	0	0
ALSTPNLDIR	10	1098.6	66.692	0	0	0	0	0	0	0	0	0
ALTMDFSR	8	939.448	45.081	0	0	0	0	0	0	2949900	2591300	0
ALTNAIGNLNIQNAYADALNK	21	2201.14	135.02	0	0	0	0	0	0	15609000	16784000	2165700
ALTNGVLSIQR	11	1170.67	123.5	5600800	3170700	6099200	4442700	20862000	66634000	13912000	13002000	5069500
ALTPVWEK	8	942.517	67.981	17265000	19659000	19528000	0	5618500	11044000	0	0	0
ALTSDVEK	8	861.444	89.296	14746000	21106000	6108500	4555700	9675200	0	79132000	96331000	0
ALTSLALK	8	815.512	127.12	46493000	30860000	72061000	36046000	95431000	59609000	29848000	45735000	33807000
ALTVLDYLVAHGSER	15	1642.87	45.864	0	0	0	0	0	0	4252400	3323800	0
ALTVPELTQQMWDAK	15	1729.87	115.18	451440000	702800000	223420000	86833000	0	0	19175000	5209300	6692100
ALVAEVVGNLSHR	13	1363.76	17.8	0	0	0	0	0	0	8362400	7920800	2338300
ALVAFYQK	8	938.523	86.113	151700000	168520000	114260000	37780000	40669000	115900000	69278000	70193000	29434000
ALVALSAFR	9	946.56	89.142	9823800	13283000	9660000	0	0	0	0	0	0
ALVAPASLIAQNAGIEGEVVVEK	23	2277.26	169.92	913990000	749930000	273380000	220360000	145250000	338870000	111980000	134270000	70462000
ALVDAPDTVR	10	1055.56	79.906	271850000	246410000	273790000	73641000	137720000	143290000	127270000	130260000	100580000
ALVEMNGK	8	860.443	94.401	6543900	14625000	7960300	0	0	0	0	0	0
ALVESFYGTDR	11	1256.6	152.34	141380000	60172000	102320000	330600000	1220400000	0	631040000	793400000	376320000
ALVGGSILGIIR	12	1167.73	46.462	0	0	0	0	0	0	10311000	19265000	2780800
ALVIAAQLSSR	11	1127.67	84.213	16660000	17537000	6000300	2008900	0	0	10174000	11913000	5286800
ALVITPSATYSAHDIPK	17	1782.95	31.883	0	0	0	0	0	0	20175000	30760000	6357300
ALVNVGGDLSK	11	1071.59	65.157	22405000	24616000	20462000	7163400	0	11876000	24831000	16697000	8985100
ALVSAHQDR	9	995.515	60.59	42621000	35219000	36224000	48538000	0	66560000	56080000	97037000	19689000
ALVSELK	7	758.454	92.467	282620000	312710000	237330000	128490000	117510000	164970000	218080000	216950000	183370000
ALVYYYPFAGR	11	1318.67	98.392	15263000	8736500	15653000	29512000	0	0	24705000	26623000	2047900
ALYDQYGEAGVK	12	1312.63	54.608	0	0	0	0	0	0	7971900	8326300	6470100
ALYFGGVYDTWAPGGGDVR	19	1999.94	107.37	40339000	0	0	65233000	0	0	60473000	67983000	15027000
ALYHDLNAYR	10	1234.61	65.157	0	0	0	0	0	8907100	0	0	0
ALYTFDIGQNDLSVGFR	17	1914.95	120.57	0	0	0	0	0	0	0	0	0
AMAAAMSSGR	10	951.427	69.628	0	0	0	2981900	4072400	14346000	0	0	0
AMAADDIDEIK	11	1190.55	63.216	0	14615000	0	0	0	14046000	11678000	10244000	3165600
AMAADDIDEIKAK	13	1389.68	82.85	50178000	45635000	15533000	28698000	0	25548000	69402000	67565000	62966000
AMAAEIEVVDGPNDEGEMFTRPGK	24	2562.17	36.295	59137000	67443000	0	0	0	0	19166000	25886000	9264100
AMAATPADVK	10	973.49	68.224	156950000	120710000	48969000	47588000	6142600	92058000	5216500	4717700	131390000
AMAATPADVKEFPNSYVFVVDMPGLK	26	2796.39	46.307	446970000	544400000	1007400000	99799000	247890000	0	0	3469200	49984000
AMAEGIWR	8	932.454	111.28	20858000	18726000	18675000	5009100	14663000	6160800	62171000	64220000	25191000
AMALAGSEFLDSLR	14	1479.74	101.93	52433000	54682000	52307000	0	0	0	9454900	11460000	4252500
AMANAAHPALILETR	15	1577.83	31.614	10830000	7929600	4835700	9762000	0	0	19337000	27747000	9449000
AMDGLPVTIR	10	1071.57	49.06	0	0	0	28034000	0	0	0	7714800	0
AMEDAGLDK	9	948.422	78.516	47821000	52543000	0	7824500	0	37302000	21399000	17677000	5787100
AMEELEK	7	848.395	84.244	6035400	8239800	5592500	5049600	6712900	8468100	12746000	10601000	6632000
AMEITQFLLAAQSADANVR	19	2048.04	96.464	21183000	53430000	0	0	0	0	0	3627100	0
AMEVAEELR	9	1046.51	83.265	6219500	8194000	5456400	4571000	4203500	8188700	0	5091900	1279400
AMEVTHYLGGENYVFWGGR	19	2185.01	123.14	74188000	62825000	0	23775000	0	0	0	0	0
AMGHHVTVISSSDK	14	1467.71	29.013	5919000	6669800	3730000	3594100	0	0	0	0	0
AMGIMNSFINDIFEK	15	1728.82	220.29	3545000000	959100000	1262000000	1103100000	655010000	766820000	2979100000	1793800000	267100000
AMGIMNSFINDIFEKLAQEASR	22	2484.21	76.027	0	0	155570000	0	8262400	0	0	0	0
AMGQAISK	8	804.416	62.546	23600000	23509000	25292000	11934000	14375000	24851000	29339000	36432000	6932900
AMGTNDVR	8	862.397	104.21	220450000	199020000	191990000	66643000	68445000	117990000	133910000	119830000	61019000
AMHAVIDR	8	911.465	97.473	5430300000	4531500000	6398800000	13349000000	6270300000	7154600000	19043000000	23010000000	11361000000
AMHAVIDRQK	10	1167.62	67.414	0	0	1506800	19263000	0	0	25448000	24261000	0
AMHGTEMLSTR	11	1232.56	37.968	3431400	5379100	4141800	3235700	0	0	0	0	0
AMIGQVAGGGR	11	1015.52	89.296	108810000	119640000	116840000	40614000	47386000	62033000	19618000	14114000	35519000
AMIQQPR	7	842.443	114.67	12179000	13759000	12906000	14474000	11245000	7583700	15173000	15389000	7042100
AMIVNAPR	8	870.475	102.98	10798000	14372000	9442900	0	5616900	0	0	0	0
AMLENILR	8	958.527	138.85	71493000	79997000	51102000	0	0	0	0	0	0
AMLISDAMETGTVQINSAPAR	21	2175.07	16.93	0	0	0	0	0	0	0	11345000	3815900
AMLLVEQVK	9	1029.59	67.169	7073100	8081300	5108300	2385500	10160000	0	3141700	3088300	0
AMMTDLAQAFK	11	1225.58	58.676	0	0	0	0	0	0	2177200	3649800	1027600
AMNEINAAAR	10	1059.51	127.56	59150000	53850000	63217000	31983000	55622000	10514000	201120000	103650000	68496000
AMPNVLMLR	9	1043.56	81.784	28648000	0	0	29390000	0	45546000	22219000	40830000	4827000
AMPNVLMLRPADGNETAGAYK	21	2218.09	132.05	847040000	791550000	1020000000	1263000000	1284600000	1536400000	615430000	814480000	342550000
AMQLLESGLK	10	1088.59	122.19	365540000	348210000	268220000	99158000	272910000	0	157220000	145890000	0
AMSAILLR	8	873.511	104.11	5209600	5609000	4445500	0	0	0	0	0	0
AMSLNLLR	8	916.516	71.296	0	0	0	0	0	0	0	0	0
AMTHSSFSEENNR	13	1508.63	39.016	10723000	14365000	12972000	0	0	0	0	0	0
AMVELEGAPFKK	12	1318.7	35.204	7781400	13058000	6863500	4648800	0	15737000	0	0	0
AMVGQVAGGGR	11	1001.51	60.59	22930000	20522000	2347100	7535700	6489500	0	0	4996700	1908100
AMVIINPGNPTGQCLSEANLR	21	2254.12	66.827	0	0	0	0	0	0	23177000	29043000	4404900
AMYSEDILK	9	1068.52	43.808	4554600	6368200	3268900	0	0	2673200	0	0	0
ANADIIQISGHDGGTGASPISSIK	24	2308.17	230.29	209440000	131460000	144710000	546990000	0	610650000	343350000	425890000	133260000
ANAEHALSTLNGTQLGGQSIR	21	2137.09	77.53	185340000	227580000	264270000	71702000	0	0	0	0	0
ANALIQHEWRPK	12	1461.78	111.86	94439000	114620000	84535000	50687000	108240000	39077000	170300000	127240000	85518000
ANALTEGR	8	830.425	66.429	12346000	0	0	0	9383000	0	0	0	0
ANANVVVASVEDKLEIVASR	20	2083.13	80.236	0	0	0	0	0	0	15490000	23285000	4914600
ANAPPGPFIAK	11	1081.59	80.438	95055000	118900000	109010000	32345000	26047000	66487000	51023000	47112000	32994000
ANAQQPK	7	755.393	126.68	6748200	0	0	4553800	0	0	0	0	0
ANAVALGNYLISK	13	1332.74	87.184	499330000	510910000	411850000	171830000	366030000	332850000	0	0	0
ANDTIKLDLESNK	13	1459.75	36.292	11884000	15883000	5304400	0	0	0	0	0	0
ANDTTYGLAAGIVTK	15	1493.77	82.362	26421000	11492000	22110000	22602000	17612000	0	18817000	18255000	8354200
ANEAFYK	7	841.397	94.407	15966000	17877000	8147200	0	0	0	0	0	0
ANEAITK	7	745.397	104.21	82337000	60048000	60786000	3246000	0	0	0	0	0
ANEIEVGVVR	10	1084.59	101.64	26842000	32710000	4509200	11829000	0	15710000	47760000	52812000	0
ANELFVGR	8	904.477	114.78	623200000	412660000	382240000	436590000	190640000	446830000	990270000	929050000	557950000
ANENDGFKFEQR	12	1453.66	84.17	6266700	5190500	6719600	2560400	0	4678900	0	0	0
ANESTSFEGLR	11	1209.56	67.704	4429600	6058300	4104000	0	0	5632300	0	0	0
ANFEFIDK	8	982.476	62.464	27008000	19777000	7776500	0	0	0	0	0	0
ANFLSSEDFEPPLIPAK	17	1873.95	113.61	542600000	575730000	495750000	153640000	0	0	65062000	54587000	25220000
ANFNDKYDEYR	11	1433.62	85.813	131250000	133010000	120780000	31006000	14341000	75293000	96879000	72680000	36640000
ANFNDKYDEYRK	12	1561.72	20.381	10134000	14007000	13464000	3603100	0	0	0	0	0
ANFTAADMR	9	995.449	49.715	8771600	6448000	5955600	12548000	14610000	17273000	27645000	25005000	0
ANFTGADLSDTLMDR	15	1625.74	128.68	45061000	0	0	0	0	57124000	5854900	6258800	0
ANGHIMLNSEK	11	1212.59	28.806	0	5468400	3136500	2882800	0	0	0	0	0
ANGIGTVTGR	10	944.504	63.216	4524300	0	0	3869800	4718400	4915600	25342000	23422000	2864000
ANGQIFNVGNPNNEVTVR	18	1941.97	186.13	37992000	34288000	37178000	0	18966000	0	0	0	0
ANGQLALQTLK	11	1155.66	43.282	0	0	0	0	0	0	4547100	4775400	2370100
ANHPMEDYHVAK	12	1410.63	61.235	0	0	0	0	0	12758000	0	0	0
ANIDIEGLLK	10	1084.61	47.603	0	0	0	0	0	0	9630800	16766000	6451200
ANIGPETNVLVMGAGPIGLVTMLAAR	26	2564.38	94.72	0	0	0	0	0	0	21175000	32452000	4686900
ANILNYNNYAEVSMATK	17	1914.91	40.725	0	0	0	0	0	0	5529100	4920700	0
ANISTVDVLTPK	12	1256.7	61.353	7207900	7112800	6136900	5594600	32153000	72972000	35677000	37712000	15061000
ANITENFTR	9	1064.53	101.54	18962000	17262000	18204000	15397000	12119000	22900000	32886000	40259000	17074000
ANIWLGTLLLER	12	1397.8	44.309	0	0	0	0	0	0	0	0	0
ANKELNDK	8	930.477	58.981	0	0	0	0	36550000	0	0	0	0
ANKLDEAVQVLDR	13	1469.78	75.736	16882000	13869000	8284500	0	0	0	0	0	0
ANLGAAAAEPVEK	13	1239.65	40.715	0	0	0	0	0	0	0	0	0
ANLGDLR	7	757.408	81.297	0	0	0	0	0	26301000	0	0	0
ANLGMEVMHER	11	1285.59	166.07	527470000	406850000	532350000	1320500000	489650000	1072900000	3730100000	4060100000	2162600000
ANLHFSLSR	9	1043.55	34.692	12352000	13167000	8055500	0	0	0	0	0	0
ANLNGYLSYHTGQSLEK	17	1893.92	74.726	50819000	29480000	49180000	16538000	0	0	0	0	0
ANLSELLGADPAVVNLK	17	1722.95	111.96	0	0	0	0	0	0	21678000	16749000	14792000
ANLTFWR	7	906.471	126.24	34024000	31419000	15408000	0	0	0	0	0	0
ANLTLTGILEK	11	1171.68	70.1	0	0	0	0	0	0	4527800	6512100	2391000
ANLVAPPGLK	10	978.586	63.48	23672000	10937000	21942000	63086000	83926000	119640000	182680000	132840000	128240000
ANNAAAAAER	10	957.463	55.461	2801100	4278800	3412400	2318900	3651600	3217300	0	0	0
ANNAFHVGGTDLLESR	16	1699.83	22.196	9050500	17921000	7877000	0	0	0	0	0	0
ANNDALWAR	9	1029.5	50.607	0	0	0	0	0	0	0	0	0
ANNFDLMYEQVK	12	1470.68	107.79	647610000	465330000	544590000	1338700000	1256400000	0	830880000	1049700000	375820000
ANNHGEASGK	10	983.442	171.7	27372000	11559000	19404000	30746000	16773000	22028000	0	0	0
ANPAMLDKIEVEYYGSPVSLK	21	2323.18	48.896	0	0	0	0	61699000	0	68972000	93469000	34998000
ANPDLQIVK	9	996.56	63.565	0	0	0	13800000	6713800	0	26782000	32331000	19481000
ANPGLLNK	8	825.471	64.523	5046000	5503700	4958700	4518000	5063200	0	0	0	0
ANPVALLLSSAMMLR	15	1585.87	81.904	0	0	0	0	0	0	12342000	12898000	0
ANQMHGLFR	9	1072.52	76.774	29424000	29341000	33788000	0	33216000	47829000	0	0	0
ANSEASLGNYTGGSGTGLASESLFVK	26	2516.2	180.56	0	0	0	245190000	52406000	41561000	131400000	149500000	40753000
ANSEATLGTYK	11	1153.56	127.4	89426000	93216000	26721000	0	30026000	60455000	80558000	107660000	46147000
ANSEEFDDPDAPDR	14	1576.63	39.625	0	0	0	0	0	0	4335800	3209700	0
ANSELSSHQK	10	1099.53	135	91381000	72253000	36983000	28942000	3860300	13271000	24512000	26900000	8394600
ANSGLNDGK	9	874.414	87.181	7663800	0	0	0	0	0	0	0	0
ANSGPLDQYLK	11	1204.61	65.535	0	16152000	14049000	6588500	0	0	0	0	0
ANSGVLYK	8	850.455	69.998	16903000	21288000	17969000	7783500	0	0	0	0	0
ANSLAQLGK	9	900.503	111.01	560220000	345190000	482070000	1078000000	1001200000	1381500000	2012100000	2276400000	1123200000
ANSLAQLGKYTGEGESEEAK	20	2080.99	22.936	0	0	0	0	0	0	0	6152500	0
ANSMAQLGK	9	918.459	44.395	7382000	4043100	4314200	0	1648100	0	0	0	0
ANSNLPR	7	770.404	47.743	8341900	7639100	7829200	0	0	0	0	0	0
ANSQPLGGDAAK	12	1127.56	45.598	0	0	0	0	0	0	10746000	11980000	0
ANSTFASAIQIGDPVSIDR	19	1960.99	59.306	0	0	0	0	0	0	8600100	8749300	4063400
ANSVFIPHGPGAVR	14	1420.76	38.445	22955000	0	20151000	12604000	10303000	0	20714000	19611000	15303000
ANSVNQALDDAVSLREPQTIHEAMR	25	2764.36	23.246	49683000	60491000	66139000	29507000	0	0	0	26531000	0
ANSYSVHGSALGAK	14	1360.67	68.069	210840000	188650000	189020000	369010000	177500000	351740000	898420000	987400000	342620000
ANTFVAEVLGLDPR	14	1500.79	182.23	29592000	0	0	0	137830000	138620000	938440000	814770000	321700000
ANTFVAQK	8	877.466	114.72	33933000	40857000	29288000	18238000	21725000	16554000	86859000	122000000	20932000
ANVILPASAFSEK	13	1345.72	94.363	48001000	67933000	34296000	38175000	45521000	0	0	0	0
ANVNAAK	7	686.371	86.121	0	0	0	3577800	0	0	0	0	0
ANVNLVPR	8	881.508	64.803	7348400	15466000	7303200	0	0	0	0	0	0
ANVVVNLIGR	10	1053.63	98.009	47415000	39415000	21459000	24007000	40681000	53998000	13234000	14006000	4240600
ANVYLDSSGK	10	1052.51	98.033	27121000	16358000	28386000	50575000	78362000	86800000	156990000	149070000	74155000
ANYEEALR	8	964.461	69.998	0	0	0	0	0	0	6888400	5388000	0
ANYLPYGVDFPLGPSGR	17	1821.9	60.401	0	0	19607000	0	0	0	0	0	0
APAALGPYSQAIK	13	1285.7	123.75	0	13415000	15288000	10187000	40427000	49599000	20171000	24068000	12205000
APAGTPVVPTLPLSR	15	1474.85	145.55	134260000	213640000	187720000	48630000	86256000	130470000	21010000	23818000	7472700
APAKPLPQMMEEDVIPSLK	19	2093.09	79.489	33840000	26962000	0	50694000	42070000	0	0	0	0
APAQVQEDPAGKEPK	15	1563.79	22.391	7917700	8716700	6873400	4196500	0	0	6984300	11913000	2457000
APASHVAVFVPESK	14	1437.76	78.529	6652500	6745400	11139000	0	0	2363100	0	0	0
APDDLDTR	8	901.414	94.114	40524000	54328000	56379000	0	24237000	21034000	10006000	0	0
APDFELPEPLTGK	13	1412.72	45.939	0	0	9490900	0	14034000	0	7010200	5576500	2998800
APEDPILGVTVAYNKDPSPVK	21	2209.16	64.522	75727000	52082000	61928000	44623000	36376000	0	32233000	36414000	13939000
APEILLGSR	9	954.55	69.825	4317700	4928000	3980200	2308600	0	3976500	0	0	0
APETTWQHDMYMDQGTAFAAQAGR	24	2682.16	64.87	64331000	55691000	44225000	0	0	0	0	0	0
APEYLAMDPK	10	1133.54	90.906	33247000	34279000	31111000	32029000	12913000	42311000	107610000	100980000	43364000
APFDLFDTR	9	1080.52	99.7	456400000	463270000	239280000	135660000	0	101460000	179770000	176520000	67899000
APFDLFDTRK	10	1208.62	78.759	20995000	34373000	34527000	0	0	0	5003600	4647900	5358700
APFTQGLGLENINVATQR	18	1928.01	271.64	79508000	53149000	82235000	29221000	71211000	0	18344000	18917000	6716400
APGFGENR	8	846.398	80.229	29503000	35232000	21660000	12759000	24492000	39176000	38877000	38207000	13537000
APGFGER	7	732.355	99.919	612940000	632730000	596940000	383580000	438750000	578620000	0	0	0
APGGAPANVAIAVAR	15	1333.75	132.01	95630000	90853000	73993000	12742000	21960000	44474000	55664000	55064000	20754000
APGGAPANVAVGIAR	15	1319.73	136.63	17966000	13987000	14804000	17589000	10686000	29051000	26061000	33792000	12036000
APGGAPANVAVGVSR	15	1321.71	91.855	3886700	4048000	3629800	3469600	2746600	3374900	11328000	11616000	3980800
APGGPSSNVAISHVR	15	1447.75	42.242	5918500	5720600	4485700	0	0	0	0	0	0
APGIIER	7	754.434	94.407	92137000	83717000	103120000	68178000	57236000	69589000	130860000	143030000	78215000
APGTSIGHLK	10	979.545	73.665	0	0	0	0	0	0	5583300	0	0
APGVQTPVIVR	11	1135.67	137.14	112590000	117540000	70104000	244850000	225540000	345750000	768530000	922700000	238070000
APGYGVLTNIINGGLECGK	19	1931.98	42.789	0	0	0	0	0	0	7127500	2179800	2237900
APIDSNLLK	9	969.549	57.177	0	0	0	0	0	0	92898000	110850000	43277000
APILPTNDLPADFDWR	16	1839.92	72.652	0	0	0	0	0	0	17489000	23142000	6162600
APISAQIVIGTPGTIK	16	1564.92	70.488	29569000	29990000	0	0	0	0	4013600	3704800	0
APISIDLQR	9	1011.57	107.29	11151000	12437000	6531100	4481900	9897900	22347000	10305000	14397000	3149100
APISQQLPGESDADYTDFSSK	21	2255.02	160.04	279410000	226370000	233880000	818900000	479820000	867100000	354860000	400350000	118420000
APLESYADIGGLDAQIQEIK	20	2130.08	160.48	0	40045000	0	0	0	0	11489000	12808000	3594900
APLGGLEK	8	783.449	67.169	50558000	60706000	61626000	14639000	19986000	36120000	0	0	0
APLGQNTVLLR	11	1180.69	136.21	165250000	203440000	181750000	54461000	182870000	328820000	63042000	55751000	39774000
APLIDNPDFKDDPNLYVFPNLK	22	2544.29	158	1293000000	1354700000	830200000	128600000	0	0	58740000	59016000	26369000
APLLPSDPYQR	11	1255.66	92.439	32772000	34838000	10271000	42405000	0	36759000	176260000	241440000	48439000
APLPTGSAVASPR	13	1222.67	103.22	54220000	82787000	67139000	17993000	20122000	32674000	37045000	26822000	8608700
APLSDTGDDLLER	13	1400.68	87.298	7718100	12211000	11541000	5022200	0	0	0	0	0
APLSSMNK	8	846.427	69.176	3752400	3917600	4467200	533300	1501500	0	0	0	0
APLTSAQR	8	842.461	124.37	27253000	33675000	24333000	7499800	11025000	0	0	0	0
APLVPPGTPVVNALSK	16	1558.91	64.64	119840000	171310000	116790000	25594000	0	0	5837100	10503000	3525100
APNGFFLQAK	10	1091.58	52.716	0	0	0	0	0	0	13614000	0	2328400
APNQASLGEEGIDLPR	16	1665.83	208.95	37642000	40847000	0	17422000	48164000	0	5561300	5826900	0
APPLLTR	7	766.47	80.462	0	0	0	0	0	0	8490900	10134000	0
APPPGPYSGTSTLALVAR	18	1753.94	128.31	49037000	41423000	30979000	22225000	36565000	32750000	13603000	11951000	6779400
APQAAGTIHTDFER	14	1512.73	68.536	34486000	45604000	29745000	16005000	0	23058000	34318000	27511000	26322000
APQQQYVQR	9	1116.57	110.61	8966200	10998000	8990300	6279400	8992400	6770300	0	0	0
APQVMTEHWR	10	1253.6	64.103	9831000	10256000	7555000	5157700	6273700	11233000	17621000	6198800	5890200
APSAEYVNVSR	11	1191.59	162.88	29371000	31761000	27604000	12111000	23048000	18098000	49694000	27902000	15641000
APSDLYLYTTFVGGSR	16	1745.86	48.004	0	0	0	0	0	0	5324200	6296900	2872800
APSLFNQR	8	931.488	105.39	157300000	173910000	160770000	67599000	0	0	0	0	0
APTAPGSQPAEGAK	14	1280.64	105.86	48009000	39519000	27574000	12770000	14770000	25649000	20959000	39414000	9651000
APTIAAAAYLR	11	1116.63	65.305	0	0	0	9317600	0	0	0	0	0
APTSEAGLAPVCK	13	1299.65	88.495	0	0	828680	3272300	0	3168400	19325000	22706000	3371300
APTSQHAPVSSDTR	14	1452.7	46.408	7612800	6531800	10291000	2192000	0	4906100	29654000	35983000	31401000
APVAALGFR	9	900.518	128.48	0	15755000	0	0	0	12909000	9473700	6776500	1829900
APVDTGNWTEVGALSEALK	19	1956.98	82.543	0	0	0	0	0	0	7494600	8015600	0
APVDTGNWTEVGALSEALKDQR	22	2356.17	179.85	154960000	117600000	137970000	73686000	104850000	0	37640000	35543000	18800000
APVNYEGVR	9	1003.51	96.253	22696000	0	16583000	10426000	15261000	16570000	24336000	29155000	12235000
APVSALAK	8	755.454	75.189	20920000	21346000	22399000	6359200	21411000	27325000	18456000	6820800	7526500
APVSLPMETFK	11	1218.63	63.734	0	0	0	0	26067000	0	0	0	0
APVVAPK	7	680.422	77.944	0	0	0	0	0	0	31366000	45841000	22557000
APVVDKDAFVAPSASIIGDVQVGR	24	2410.29	25.52	0	0	0	0	0	0	13998000	22689000	6168400
APVVPFDEIK	10	1113.61	66.27	0	0	0	0	0	0	16789000	21599000	5307600
APVVVIAHQAVLR	13	1371.84	27.137	1948200	0	0	2050000	0	0	0	0	0
APWDIKDDEHEIK	13	1594.76	97.734	14645000	5809000	1768000	45282000	0	46837000	4270100	10205000	406780000
APWDIKDDEHEIKLR	15	1863.95	96.993	45910000	13959000	17355000	53354000	0	0	0	5523100	236200000
APWLEPLR	8	980.544	107.43	893070000	621870000	261240000	2204100000	902280000	3363800000	1178700000	1244800000	278630000
APWLEPLRGPNGLDLSR	17	1890.01	211.22	75982000	61526000	136250000	267760000	1081100000	164650000	1026700000	997180000	547540000
AQAAENPVVQQK	12	1281.67	54.416	8918200	10970000	11020000	4664200	7584200	7351000	14555000	13475000	6149100
AQAAFLAR	8	846.471	128.75	28583000	14935000	19729000	0	31360000	25252000	0	0	0
AQAALLTR	8	842.497	86.794	58628000	65755000	40984000	17249000	31375000	40543000	50736000	52557000	17814000
AQAEAEGK	8	802.382	72.789	15883000	0	0	8452400	0	10704000	0	0	0
AQALGDTSSLEFMR	14	1524.72	178.1	271400000	369480000	253710000	208830000	40511000	194290000	93991000	138210000	69443000
AQASALEK	8	816.434	77.282	247460000	288240000	211670000	162720000	187170000	278800000	545790000	702680000	387600000
AQAYIQLADLDLAEFDIKK	19	2164.14	52.318	0	47160000	0	0	0	0	0	0	0
AQCPIVER	8	971.486	75.213	5522200	3860000	12719000	0	0	3251500	0	0	0
AQDLAQPLVEAQIPFR	16	1794.96	111.94	15692000	21222000	14928000	15692000	0	0	13917000	19280000	9561900
AQDNTEQR	8	960.426	77.058	6851900	0	0	14187000	0	0	21324000	28385000	0
AQEAFLAR	8	904.477	121.29	12422000	0	0	74456000	92989000	110630000	97082000	137190000	69367000
AQEAVVNGR	9	942.488	122.74	11372000	8724700	0	25984000	8161800	42929000	98374000	122880000	18782000
AQEELLK	7	829.455	90.986	9443600	12153000	12661000	6925600	8429800	10901000	45779000	42426000	0
AQEVLGQVR	9	998.551	54.157	4909000	5477600	3983100	0	1144300	0	0	0	0
AQEVMKQEDAEELQK	15	1774.84	52.527	10635000	10882000	8193800	0	0	0	5658900	13540000	6998800
AQEYVNLLK	9	1076.59	101.28	124950000	107140000	106390000	177990000	739440000	731000000	631360000	634870000	288770000
AQFALEKGDEDLAR	14	1561.77	45.434	0	0	0	0	31388000	86162000	0	0	0
AQFDVEEMK	9	1095.49	69.423	7429800	7375000	2861800	4290900	0	9135600	0	0	0
AQFIKDNADSVR	12	1362.69	24.964	0	0	0	0	5075100	0	0	0	0
AQGDADSALDR	11	1117.5	86.898	105530000	154480000	38695000	28608000	36259000	149640000	132070000	187000000	36372000
AQGDADSALDRLWQK	15	1672.82	145.31	114150000	69485000	441300000	33400000	175400000	0	10547000	9051900	19484000
AQGDADSALDRLWQKK	16	1800.91	77.562	6037800	0	19229000	0	0	0	0	0	0
AQGDISGAIEGLNK	14	1371.7	50.284	7037000	9487900	2110600	3702000	0	0	5221800	0	0
AQGESESAK	9	905.409	53.775	5302700	0	0	4598800	0	0	0	0	0
AQGGPGGPGGLGGPMDFGR	19	1683.78	134.88	122190000	133020000	134500000	141590000	94082000	226140000	66004000	71846000	33974000
AQGLPLSDFVK	11	1173.64	87.258	72583000	63927000	48738000	27375000	31129000	0	0	0	0
AQGLSVGSSLVEEDK	15	1517.76	63.408	0	0	0	0	0	0	13532000	15921000	2861300
AQGYSVGSSLVEEDKYDLATTLLEK	25	2715.35	129.93	36590000	428130000	12980000	55053000	139510000	0	71681000	79645000	29958000
AQIPLDVIWNDDDHTDGK	18	2050.96	77.506	68692000	50207000	28337000	0	29849000	0	8788600	7523000	3233200
AQIPLDVIWNDDDHTDGKK	19	2179.05	91.401	537880000	162610000	516840000	154780000	51835000	161620000	58629000	36275000	15306000
AQIPVTNPDPGR	12	1263.66	60.064	0	0	0	0	0	0	12341000	19372000	6084900
AQISALVDK	9	943.534	67.993	65942000	61135000	31545000	50983000	27629000	85179000	0	0	0
AQISALVDKGK	11	1128.65	36.417	0	0	12182000	2529500	4966200	0	0	0	0
AQISNAQPDDLIDFYHLK	18	2087.03	68.82	0	0	0	0	0	0	17713000	19376000	5088000
AQIVTPVLLK	10	1080.69	90.657	156840000	107010000	131180000	88289000	228040000	277360000	31616000	53951000	18669000
AQIWDTAGQER	11	1273.61	128.27	80809000	83167000	83339000	18918000	0	123760000	0	0	0
AQLAILDTR	9	999.571	57.59	5104400	4297400	2115700	0	0	0	0	0	0
AQLAYER	7	849.434	94.407	23678000	28486000	22842000	6751300	7182600	12128000	0	0	0
AQLDQLQSEADIAR	14	1556.78	108.56	7968100	12671000	7446600	8017500	0	0	0	0	8179700
AQLDQQK	7	829.429	92.692	117500000	70596000	73318000	84830000	9792900	107060000	0	0	0
AQLEEDPIVHR	11	1305.67	85.731	28013000	31615000	8644000	9007200	0	26104000	0	0	0
AQLEELKK	8	957.549	50.607	35066000	34094000	17809000	15136000	0	34396000	0	0	15310000
AQLEIVDSK	9	1001.54	78.192	11578000	20451000	11112000	4671100	3843300	4551800	0	0	0
AQLEVYGR	8	934.487	71.296	0	0	0	0	0	2860100	21121000	15669000	6224500
AQLGEIFELDR	11	1289.66	154.85	825230000	474310000	429060000	1947800000	1029600000	1833300000	1276000000	1420400000	470990000
AQLGEIFELDRATLK	15	1702.93	116.24	0	0	165320000	0	153210000	0	9321300	8474000	11770000
AQLGLGHSYSR	11	1187.6	44.425	4459400	5664000	0	0	0	0	0	8407800	5628400
AQLGVEAFADALLVIPK	17	1754	113.61	73956000	62885000	4876700	0	0	0	0	0	0
AQLHMDGAQIDGNVVR	16	1722.85	54.281	5706600	5208900	3031700	1643300	0	0	11187000	14046000	0
AQLNATLNHYNNSYGNAINK	20	2219.07	31.111	107680000	87571000	107160000	22162000	181050000	0	61014000	48992000	26346000
AQLNSLQSGTR	11	1173.61	107.21	0	0	1327300	3293100	0	0	24698000	19789000	9001700
AQNASSLIEFSSK	13	1380.69	160.18	67187000	48973000	45836000	45183000	188610000	156810000	36628000	54267000	29976000
AQNVEAPVVIVTGASR	16	1609.88	154.36	33162000	30142000	26495000	0	0	0	0	0	0
AQPGVTATDVNVEEVR	16	1683.84	113.24	21787000	18753000	18367000	20659000	0	36036000	30549000	43398000	18124000
AQPLGTIAAAPWGSALILPISYTYIAMMGSK	31	3191.68	60.288	0	0	0	0	0	24092000	73902000	0	0
AQPQFLNDWK	10	1245.61	78.113	0	0	0	0	16700000	0	0	0	0
AQQAGVGK	8	757.408	58.167	0	0	0	0	0	0	0	0	0
AQQAGVGKIEITNDPK	16	1667.88	20.389	0	0	5106300	0	0	0	0	0	0
AQQAVVR	7	770.44	80.377	34544000	59285000	36466000	16263000	0	37918000	0	0	0
AQQEVANNSPEIKEPATK	18	1952.98	43.261	8397300	10577000	11370000	0	0	0	0	0	0
AQQEVQNGGAEK	12	1257.59	146.11	14682000	28079000	19469000	5799800	3874800	5396300	0	0	0
AQQLLQNVANR	11	1253.68	52.482	2198000	1891100	2575400	1855600	0	0	0	0	0
AQQQVER	7	857.436	86.866	31621000	29659000	21636000	12120000	23480000	26900000	25223000	31154000	11410000
AQSELYNWR	9	1165.55	121.99	19314000	20879000	16065000	5756500	0	0	11350000	17640000	5725000
AQSLQSATLDGNSR	14	1446.71	57.348	2117500	4182300	0	0	0	0	0	0	0
AQTGTVNPGGR	11	1056.53	57.859	8657900	11752000	10661000	6528800	0	0	0	0	0
AQVAAAASHPQVAAESLAK	19	1818.96	32.181	5653400	11298000	6948300	2272300	0	11967000	0	0	0
AQVAVPPPVAVENEEANK	18	1860.96	32.062	0	0	0	0	0	0	3889000	6114700	4912800
AQVEEFYVITWDSPK	15	1810.88	142.12	62338000	0	0	48520000	0	0	33361000	15107000	9991700
AQVENGVLTIVVPK	14	1465.85	42.336	0	0	0	0	0	0	0	2434500	12751000
AQVLESEGER	10	1116.54	88.37	14725000	15678000	13668000	6711700	8218600	9752700	33525000	25020000	15717000
AQVQGTNQDHLQIFNIELK	19	2195.13	66.893	151810000	129010000	36055000	37662000	0	52179000	17467000	15434000	4501200
AQVTTEAPAK	10	1014.53	63.534	0	0	0	7563700	0	9328800	16301000	22424000	14417000
AQVWVAPR	8	925.513	71.715	0	0	0	0	0	2344000	9961500	6022500	8821200
ARADYDYLIK	10	1226.63	55.401	5556100	5422500	6352800	0	0	3514700	0	0	0
ARDDVLADFYNK	12	1425.69	70.808	0	0	0	0	0	0	23741000	32690000	2240900
ARFEELNMDLFR	12	1539.75	144.1	555600000	622500000	161460000	156120000	0	136770000	29265000	29531000	7658500
ARFEELNMDLFRK	13	1667.85	96.23	78598000	60439000	81981000	7576000	0	0	0	0	0
ARFEELNNDLFR	12	1522.75	282.61	631420000	730920000	325080000	87035000	0	261590000	37101000	36430000	16035000
ARFEELNNDLFRK	13	1650.85	96.067	13079000	7256300	153170000	0	0	0	0	0	0
ARGELEITYLDEELR	15	1805.92	57.52	0	0	0	22747000	0	0	11413000	0	8381400
ARGEVISTK	9	959.54	125.16	121540000	140370000	121310000	19141000	32944000	19992000	122750000	65094000	24319000
ARPHLVESTSGSR	13	1395.72	74.537	92109000	61427000	38986000	34098000	10280000	0	88063000	85711000	22041000
ARVYDDEVR	9	1121.55	53.124	0	0	6751100	3962900	0	0	0	0	0
ARVYDDEVRK	10	1249.64	56.359	0	0	14772000	2075000	23792000	0	9746500	8017800	10128000
ASAASSSSNSSSGLTFK	17	1587.74	62.528	1574700	1623800	2283300	0	0	1950900	0	0	0
ASADKDGDSMLVDNAPSEK	19	1948.87	49.036	19156000	24420000	22618000	12521000	6379400	18306000	10085000	7675100	4186900
ASAEVER	7	760.372	91.906	16402000	11321000	11745000	4951600	7802000	0	0	0	0
ASAIQTGTK	9	875.471	146.58	106840000	71397000	88029000	0	0	63713000	78214000	53012000	29420000
ASALAVPTNDMAVR	14	1414.72	60.518	2080000	3192500	3179400	0	0	0	0	0	0
ASALIQHEWRPK	12	1434.77	125.28	74596000	74675000	56872000	47270000	24248000	17424000	76941000	93771000	19843000
ASALQENQK	9	987.499	119.17	6423800	7901000	5615500	3559200	2507600	5093600	11015000	9937400	5855100
ASAMAETLWSGNRDESGK	18	1908.86	29.274	0	7273400	6733100	0	0	0	0	0	0
ASAPSEQQK	9	944.456	58.596	31347000	25981000	17029000	6167600	10314000	13840000	0	0	0
ASASAPTR	8	759.388	64.207	0	0	0	0	7781100	4840000	38206000	0	12143000
ASDAVQFYK	9	1027.5	136.16	75569000	118290000	89060000	13510000	22527000	24178000	56684000	61449000	19074000
ASDFGLMK	8	867.416	69.998	13262000	15559000	14796000	31814000	20458000	25130000	100630000	143040000	27563000
ASDSANLDSAAELLIR	16	1644.83	205.46	0	0	0	0	0	0	104790000	112530000	41810000
ASDVEDKEK	9	1019.48	99.136	6236100	5846000	0	0	0	0	0	0	0
ASDVMAVLS	9	891.437	85.265	92574000	61023000	73164000	29724000	53600000	375280000	0	0	0
ASDYEAGEVR	10	1095.48	46.158	0	3539100	0	0	0	0	0	0	0
ASEGLVLR	8	843.481	138.24	93656000	116020000	81122000	31012000	84258000	122520000	65135000	72863000	30803000
ASEGVGPVEEYDYLPYFYSR	20	2340.06	227.63	270810000	174450000	184370000	164480000	308760000	0	115470000	178810000	157260000
ASEHTVLQFSSSSLSAK	17	1777.88	188.96	72557000	83160000	50861000	17095000	0	0	9416900	5157000	2499500
ASEIDNR	7	803.377	76.847	0	366370000	260750000	22034000	70777000	138020000	0	0	0
ASENVTDKNAVFR	13	1449.72	96.342	6589200	8102800	14968000	0	0	0	0	0	0
ASEQDIAQLK	10	1101.57	79.474	6112800	5840300	4586200	2615400	2760800	4873000	10665000	7305300	1961500
ASESFATR	8	867.409	95.531	7753200	0	8294600	0	11769000	12558000	52465000	44752000	27998000
ASETDAQTAESK	12	1236.55	208.11	22384000	27133000	19636000	38078000	41790000	44027000	115480000	96621000	72916000
ASEVAYKEQENPDSPAIPTVESVPEESFEK	30	3305.55	19.379	0	0	0	0	0	0	14499000	15581000	1967400
ASFAGDLNFYGK	12	1288.61	63.283	0	0	0	0	0	0	13749000	12564000	4160700
ASFDDDLNAPNR	12	1333.59	72.643	10128000	13964000	3679700	0	0	0	0	0	0
ASFLETWR	8	1008.5	95.531	38884000	44605000	48268000	23773000	0	0	0	0	0
ASFSEAPPGNAK	12	1174.56	65.224	6089600	4587200	5848500	3179000	3715900	14155000	10459000	0	6033400
ASGAASVDSAR	11	990.473	111.61	33820000	45335000	36492000	16430000	25137000	13549000	25114000	30451000	19311000
ASGAATSVVPANR	13	1199.63	140.16	15789000	21697000	15940000	8499000	6243500	0	12646000	13096000	3944600
ASGAEPGSR	9	830.388	73.157	0	0	0	0	0	10486000	0	0	0
ASGAFILTASHNPGGPHEDFGIK	23	2322.14	84.573	69688000	68554000	0	43076000	0	0	89155000	61515000	6689500
ASGATVTIQETR	12	1232.64	104.79	7614100	8497200	9329400	0	1385100	2124000	6112500	12771000	3659600
ASGDGMDSSAVTK	13	1224.53	73.067	0	0	0	0	0	0	5747300	21103000	2387000
ASGDVEMKDEDAKDVSK	17	1822.83	29.687	8145600	6678400	4789500	2475400	0	0	9782500	8445300	2191900
ASGGVEWHVRPPNPK	15	1629.84	24.558	3597100	4779400	0	0	0	0	0	0	0
ASGIQWDLR	9	1044.54	84.498	24307000	0	0	29063000	0	0	17717000	28375000	0
ASGPVISTVNPSNNQK	16	1611.82	81.625	7509900	11218000	8034400	6089600	10000000	10135000	15952000	13004000	10746000
ASGVSENLTR	10	1032.52	80.231	9301000	9798000	9669700	5084400	0	0	0	0	0
ASHIVGYPR	9	998.53	98.458	153370000	177070000	144710000	32593000	61505000	166010000	39217000	45423000	23102000
ASHQVYQPGGGSPISSTNKPISQR	24	2495.25	17.907	7342100	9371400	0	0	0	0	0	0	0
ASIMTDGFNSCR	12	1357.58	75.294	0	0	0	0	0	0	10684000	7023400	0
ASIRPDIVNFVHANISK	17	1880.03	105.89	1086600000	1357100000	745750000	228950000	208740000	176120000	92483000	95769000	27971000
ASITPGTVLIILAGR	15	1480.9	103.34	117220000	210470000	219920000	0	172310000	0	89500000	38617000	0
ASIVELIR	8	899.544	104.37	108620000	92387000	69570000	61104000	91213000	110740000	35909000	36259000	14806000
ASIYNAMPLAGVEK	14	1462.75	89.805	0	140440000	110290000	28352000	48255000	0	0	24598000	7915300
ASKDNVPLIDVTQFGYFK	18	2041.05	88.565	0	76573000	179390000	0	0	0	8612300	7794500	7400600
ASLAPGFK	8	789.438	73.616	16561000	23288000	13317000	3733500	5308000	0	13444000	11875000	0
ASLATGSQQPLR	12	1227.66	45.598	1663900	0	946270	0	3183300	4622500	0	0	0
ASLENGVLTVTIPK	14	1440.82	74.962	0	0	0	0	0	0	0	0	29698000
ASLLSELAAK	10	1001.58	84.615	47437000	50100000	39616000	0	0	0	10772000	9921900	4425300
ASLNDFDR	8	936.43	106.04	83871000	87838000	40422000	20456000	26309000	65308000	69161000	112160000	21938000
ASLNDFDRFK	10	1211.59	187.14	87224000	75300000	144650000	22595000	371220000	53456000	25043000	25552000	27915000
ASLTALFK	8	849.496	100.19	31549000	35832000	12654000	0	0	25029000	7302300	8444500	2829400
ASLVEQVK	8	872.497	89.296	29987000	51097000	7720400	8419200	3620000	17474000	24668000	28959000	7926900
ASLVGIVK	8	785.501	71.296	0	0	0	0	0	0	19717000	30825000	16464000
ASLVNDVDDVEK	12	1302.63	66.595	19411000	15186000	0	8919100	0	42072000	0	0	0
ASMDNGVLTVTVPK	14	1430.74	96.604	702410000	177230000	253860000	296520000	196630000	390020000	0	12621000	288510000
ASMDNGVLTVTVPKEEVK	18	1915.99	115.8	416240000	129660000	28113000	250580000	54597000	193690000	0	8635500	395610000
ASMENGVLTVTVPK	14	1444.76	78.692	698220000	314190000	433760000	264830000	0	230780000	8504300	7564500	321560000
ASMGGYISSQSVK	13	1313.63	56.551	16977000	23707000	7801900	3944200	6168800	7880300	11539000	13545000	0
ASMGQDLSPIDLINVHQFAQR	21	2339.17	74.776	77967000	114950000	50255000	0	0	0	0	0	0
ASNAAVPFWR	10	1117.57	174.52	24486000	12324000	31218000	21839000	0	0	8663500	12722000	6984000
ASNDAQSEAPTDLK	14	1445.66	66.262	3241700	1038900	2337000	16513000	8901300	16302000	31742000	36964000	7142200
ASNEGGGPPPALVK	14	1292.67	52.49	3020600	2685200	2009400	0	0	0	8850800	5621200	2094800
ASNFASGLVK	10	992.529	50.607	227990000	242090000	183050000	82748000	60252000	0	0	0	0
ASNNFPTPLEVSNKDDVAVGR	21	2229.1	79.635	166910000	156150000	104770000	39089000	0	0	31790000	38115000	0
ASNPFVNLK	9	988.534	91.9	32845000	38445000	28911000	8439700	0	0	0	0	0
ASNPPPAPAYGGISR	15	1453.73	36.303	8065800	10857000	6738600	2713700	0	3267100	0	0	0
ASNPVVMVQAYR	12	1333.68	67.334	0	0	0	34349000	0	33757000	33385000	59834000	6017900
ASNTVITSSVK	11	1105.6	41.54	3968400	7862200	3757600	1713800	2436300	4224700	0	0	1235900
ASPESTSVK	9	904.45	66.073	10210000	0	3828700	3493500	0	7224400	0	0	0
ASPETIAK	8	815.439	69.998	14037000	15528000	15580000	0	0	4709900	0	0	0
ASPIQLAGR	9	911.519	56.547	12452000	15382000	14696000	3852400	6544500	7285100	0	0	0
ASQFDLVK	8	906.481	91.9	16860000	0	16913000	0	0	11375000	0	0	0
ASQLVLNAIEILK	13	1410.84	68.44	0	0	0	0	0	0	11962000	0	0
ASQPVSSATVSSR	13	1275.64	62.894	18548000	26157000	23213000	7546400	11733000	18955000	16939000	18946000	5854600
ASQQFWFQR	9	1196.57	57.281	44225000	27026000	15121000	29275000	0	0	4557100	7856400	2827300
ASSAAASSGWYR	12	1212.55	84.17	0	0	0	0	0	0	9888400	11228000	2894000
ASSAAEMIFRCVFEASISMRDQEIER	26	3032.42	22.475	0	24220000	48129000	0	0	0	0	0	0
ASSAEYVNVSR	11	1181.57	90.108	21053000	26719000	22141000	11106000	13748000	11761000	21063000	0	15578000
ASSALISDTDAWK	13	1363.66	107.83	39742000	46064000	9118900	23086000	0	0	19353000	23794000	4955300
ASSALISDTDAWKDLK	16	1719.87	146.07	0	0	0	0	101310000	0	14844000	15851000	11384000
ASSDDKAQVYDRDVK	15	1695.81	50.305	16048000	20043000	30097000	10322000	20863000	7165200	16185000	13782000	15560000
ASSDEGENWGNESSGK	16	1652.65	109.24	37768000	36770000	19437000	29162000	37062000	38759000	24899000	41399000	17111000
ASSDGKLELR	10	1074.57	61.65	0	0	0	0	0	0	7329600	12362000	0
ASSEADSR	8	821.352	40.352	0	3681200	2519000	0	0	0	0	0	0
ASSEDLVDKQWER	13	1561.74	50.284	0	0	0	0	0	0	4487900	5103400	0
ASSEDSLR	8	863.398	45.68	0	0	0	0	0	0	0	0	0
ASSESSEALSDGKEEAVSVDKLPLESK	27	2791.36	73.655	75227000	82407000	90436000	26640000	42088000	79300000	8510800	15512000	3545700
ASSFSSASSSLSK	13	1244.59	78.342	6624000	14470000	7888200	0	0	0	0	0	0
ASSGGSGAGPK	11	874.414	71.614	6763600	0	0	7870300	0	0	0	0	0
ASSIVSSAATVASIK	15	1390.77	21.396	0	0	0	0	0	0	0	5944200	0
ASSLAEEAQEKDEAAGPSIEELFTK	25	2649.27	76.691	42929000	28899000	0	49350000	0	48814000	26176000	27726000	8391400
ASSLGAK	7	632.349	89.673	26036000	10152000	5193800	12912000	5797500	15070000	0	0	0
ASSLPSVQTHPAR	13	1349.71	38.189	0	3735600	7779700	0	0	0	0	0	0
ASSMDEVLR	9	1006.48	92.439	43227000	31707000	30105000	117260000	74375000	175640000	210510000	308620000	66895000
ASSSDASNASQAPR	14	1347.6	78.342	5951300	7648600	6426500	0	2501900	0	0	0	0
ASSSPSDHK	9	914.409	68.95	23568000	18296000	17161000	16667000	8626000	11907000	0	0	0
ASSSSSSSPVVTER	14	1379.65	39.148	2365900	3279400	2277100	0	0	0	0	0	0
ASSVAQVVTTLQER	14	1487.79	169.65	1425100000	1131800000	941860000	3059500000	2413500000	3665700000	1540700000	1920200000	546390000
ASSVVISGTDIIRPR	15	1569.88	69.716	23721000	33908000	18721000	10507000	47343000	0	34855000	40116000	12266000
ASSYADELVK	10	1081.53	93.649	7527000	6177200	6967800	16908000	10582000	25151000	41816000	50766000	17492000
ASTAAANSLNK	11	1046.54	76.282	29311000	38314000	25849000	15178000	21703000	24931000	23889000	28175000	13448000
ASTEEVKTDTESGK	14	1480.69	64.82	0	0	0	0	7562500	0	104870000	82778000	51855000
ASTIIPTMIGHTIAVHNGK	19	1960.06	24.893	0	0	0	0	0	0	0	10450000	0
ASTVLSQAVR	10	1030.58	64.04	9477900	7341600	8150500	8299000	8220900	0	14315000	18095000	9026700
ASVANGLATNLK	12	1157.64	107.79	20975000	21039000	20157000	8136900	0	7388200	0	0	0
ASVEAQLK	8	844.465	79.469	0	0	5869500	0	11288000	3639700	0	0	0
ASVFVQSHVR	10	1128.6	48.44	0	0	0	0	0	0	3940600	6644500	3298200
ASVHLPFDHK	10	1149.59	48.981	14100000	12800000	13222000	3976300	9189100	0	13297000	9757100	2980800
ASVSVISVR	9	916.534	66.27	24144000	29724000	27715000	0	6073800	0	0	0	0
ASYTMQLAK	9	1011.51	97.093	12596000	0	12018000	18119000	0	20129000	44086000	61024000	14996000
ATAAQQYGASPFLSGLK	17	1708.88	53.252	0	0	0	0	0	0	2901400	0	1224700
ATAAYIYIR	9	1040.57	63.21	7407100	7127100	5943300	4020600	0	0	0	9401300	2766000
ATADGHDVK	9	912.43	74.301	9465300	9222800	5614300	4304200	4172700	6664100	0	0	0
ATAEGLALVSK	11	1058.6	75.387	15333000	16808000	16007000	0	0	2704700	10764000	12693000	7467100
ATAENVDEAVR	11	1173.56	80.755	4775500	4221700	2384200	3991500	4100900	9055600	18501000	18607000	6409400
ATAFGLMK	8	837.442	72.138	14796000	14815000	12905000	0	16621000	27047000	44065000	53176000	12729000
ATAGDTHLGGEDFDNR	16	1674.72	142.1	689770000	877510000	590100000	355720000	181560000	587980000	553030000	559150000	466310000
ATAHHMK	7	794.386	109.11	0	0	0	0	0	108710000	0	0	0
ATALANDPIIK	11	1125.64	83.783	0	0	0	0	0	0	9055900	0	0
ATALANDPIIKDTLK	15	1582.89	78.903	41068000	65336000	42396000	8002200	0	0	0	0	0
ATANPFDLLLDDDNEDPSLLIAAAQQK	27	2897.43	130.16	338000000	226320000	0	31018000	0	0	0	189310000	76243000
ATASLDEETSKK	12	1278.63	80.688	0	0	0	0	2146500	3744300	6554100	8821400	2554100
ATATTNATGMVTEKR	15	1550.77	51.092	0	0	0	0	0	0	0	0	0
ATDAESTEVILEAALK	16	1659.86	90.614	0	0	0	0	0	0	6780000	7234800	3211500
ATDAVIGGPGK	11	984.524	100.98	11576000	20172000	15622000	8605800	0	0	19970000	28526000	11195000
ATDEEGGDGR	10	1005.4	71.425	12253000	10512000	11818000	0	0	3003000	0	0	0
ATDLNQGVVYGVK	13	1362.71	83.948	15906000	14156000	15088000	0	4998400	8398100	10335000	8477800	12177000
ATDSFDDAIAGLSK	14	1409.67	175.74	23747000	0	24494000	46069000	0	0	59058000	45101000	25753000
ATDVMIAGK	9	904.469	84.743	71137000	251180000	189120000	60697000	40243000	196940000	85124000	117840000	29855000
ATDVQLPAGASFVIAHSLAESQK	23	2339.21	75.539	46007000	59375000	38870000	62462000	0	0	14302000	19583000	9162200
ATDVSPALK	9	900.492	65.88	4804100	4990200	0	0	3425300	3054100	3823800	15949000	6852300
ATDVVVLEHEGKR	13	1451.77	81.494	11755000	15399000	11674000	0	20956000	22236000	24521000	18968000	10796000
ATEALRPGAETK	12	1242.66	28.384	0	0	0	7771500	0	0	0	0	0
ATEEQIQAQR	10	1172.58	50.607	0	0	0	0	0	0	0	0	0
ATEEYELAR	9	1080.51	70.919	8710200	9492000	7135800	8876800	5296300	0	13743000	0	8659200
ATEMSIR	7	806.396	97.473	12665000	15122000	14114000	9548300	0	8624000	0	0	0
ATEQWFASVEGFR	13	1526.72	50.786	10027000	0	6729700	0	0	0	0	0	0
ATERDVYEFFSK	12	1490.7	39.424	0	29871000	33145000	0	0	0	0	0	0
ATESAYR	7	796.372	86.866	0	2813600	2579600	8055300	6458300	0	0	0	0
ATFDNPEYNK	10	1197.53	68.224	56676000	28278000	10327000	97600000	34076000	119050000	189080000	241930000	88505000
ATFDNPEYNKLIDYYVK	17	2092.02	179.83	0	0	90178000	55453000	406540000	0	0	0	0
ATFISHGNTAR	11	1173.59	36.303	12787000	18754000	10875000	0	0	0	0	0	0
ATFQSHFEK	9	1093.52	30.612	0	11998000	9607900	3808600	0	0	0	0	0
ATGDNVGPLLLK	12	1196.68	104.42	19205000	20161000	23029000	34830000	124570000	110180000	48529000	61813000	28110000
ATGEFTK	7	752.37	81.784	251930000	346410000	374850000	64583000	6670600	0	0	0	0
ATGEGVQPQEYTIIK	15	1632.84	94.791	8161500	9054800	4821600	4113500	26685000	28256000	12313000	14832000	2812800
ATGENSESSTSLSITK	16	1610.76	45.915	8966300	4580700	6216700	8594700	0	7110600	7518000	14464000	10756000
ATGGASIADGQIELMLHR	18	1838.93	50.387	24660000	0	0	7799500	0	0	57422000	39482000	12551000
ATGKEQQITIR	11	1243.69	75.416	0	0	8690700	0	0	0	0	0	0
ATGQLFSR	8	878.461	46.129	0	0	0	0	0	21709000	0	0	0
ATGYPSFMEQLASSGANAVESR	22	2272.04	147.24	70714000	76781000	70564000	27233000	0	0	33520000	36475000	23517000
ATIANMSPEYGATMGFFPVDHVTLQYLK	28	3100.5	76.161	48396000	42275000	0	0	0	0	0	0	0
ATIELTHNWGTESDPEFK	18	2073.96	28.472	85014000	0	29926000	48514000	0	0	27622000	29971000	0
ATIFPHNVGLGATR	14	1452.78	32.523	13681000	14557000	17170000	0	48025000	0	0	0	0
ATISLTDELISSPK	14	1473.79	74.611	0	0	0	0	0	0	9904100	13175000	4065600
ATLEDGHQVAVKR	13	1422.76	36.284	0	0	3315700	0	0	0	0	0	0
ATLFPGDGIGPEIAESVK	18	1799.93	93.494	26818000	0	32974000	28682000	35363000	0	0	0	0
ATLGLTQPNAIELPK	15	1564.88	150.09	139960000	117700000	144540000	77517000	0	120020000	40414000	49258000	23433000
ATLNGISFVNPSTPIR	16	1685.91	172.13	151730000	155850000	159890000	58527000	74026000	82282000	23363000	24223000	7202000
ATLQFLEK	8	948.528	80.229	0	0	0	0	0	51267000	0	0	0
ATLSGLPDR	9	928.498	55.37	0	0	0	0	0	0	38526000	45954000	23599000
ATLSVPEVVPSPLEDAEQLRK	21	2277.22	125.22	363900000	253910000	275810000	25034000	0	0	37036000	37238000	24691000
ATLVPPAPEQK	11	1149.64	74.92	12038000	14383000	12277000	0	12806000	17318000	7777800	0	7044200
ATLVVGNVLPIR	12	1250.77	138.4	334800000	408760000	201980000	95448000	115070000	155580000	36236000	44429000	14843000
ATMALSLAEAR	11	1132.59	59.426	0	0	0	0	0	0	0	0	0
ATMNMLHR	8	972.463	55.676	105890000	82417000	110090000	22268000	0	25560000	14246000	10840000	5853700
ATNAALIK	8	800.476	87.435	26822000	17424000	19868000	12158000	42009000	48630000	40446000	43201000	0
ATNEMLNYMR	10	1241.55	87.308	0	0	0	0	0	0	10432000	6706000	0
ATNEPTANGVTK	12	1201.59	#NUM!	0	0	0	0	0	0	0	0	0
ATNFQQALVPHPAK	14	1520.81	63.694	0	0	0	0	0	18056000	3430300	5804100	0
ATNLEMENK	9	1048.49	135.83	300400000	216700000	253690000	483970000	439940000	979600000	1839500000	1550400000	903130000
ATNLEMENKLK	11	1289.66	26.659	0	0	15350000	2350400	0	0	0	0	0
ATNVSSR	7	733.372	124.59	0	31957000	24259000	0	16554000	25835000	0	0	0
ATPAPPVGPALGSK	14	1261.7	89.403	37036000	26073000	35486000	48551000	22584000	40809000	25709000	34663000	58335000
ATPEMWPDLIAK	12	1370.69	51.092	0	0	0	0	0	0	8179300	6353100	3101800
ATPLLLGAGPAPGAADIQHSSSVTK	25	2358.25	29.959	46574000	33438000	29049000	0	0	0	11337000	12643000	9872000
ATPNAVAPSR	10	982.52	83.783	37561000	48354000	36211000	12424000	14440000	16829000	14313000	13972000	7993200
ATQASQFVAK	10	1049.55	120.87	23017000	23238000	17555000	12926000	13745000	17440000	57401000	62834000	25864000
ATQGEAIR	8	844.44	92.822	16568000	0	11539000	0	0	13439000	0	0	0
ATQIIDK	7	787.444	92.187	495950000	951490000	214390000	899840000	140240000	672860000	11326000	19893000	5847800
ATQIIDKVVQGSNVHVENIEEK	22	2449.28	138.25	523010000	658380000	3513500000	864800000	193590000	61814000	50249000	38875000	161370000
ATQIIDKVVQGSNVHVENIEEKSPNANFTVPLCTIK	36	3992.07	40.864	0	0	315980000	0	0	0	0	0	0
ATQIVDK	7	773.428	81.784	44680000	63078000	14187000	18257000	4733200	31981000	18071000	24137000	0
ATQIVDKVVQGSQVHVENIEER	22	2477.29	121.14	24004000	0	142590000	0	0	0	0	0	0
ATQLINLK	8	899.544	79.146	0	0	0	0	5296800	0	16422000	0	0
ATQNQLAR	8	900.478	105.2	210930000	212540000	59020000	557510000	159160000	789840000	1390300000	2014900000	492710000
ATQQDYSEAAK	11	1210.55	61.56	0	0	0	0	0	0	14772000	15990000	1952600
ATQTVEGSSR	10	1034.5	115.71	264200000	186830000	268010000	746190000	883140000	989180000	1060300000	1284000000	386850000
ATSAGLKEQEAINFLEK	17	1847.96	50.831	83338000	57280000	71212000	0	0	0	0	0	0
ATSAWGLEAR	10	1060.53	44.863	0	0	0	0	0	0	3979700	5399200	4106600
ATSDLLLVQSDLYTLEDGFIIR	22	2481.3	28.076	0	0	22533000	0	0	0	0	0	0
ATSDPEIWK	9	1045.51	60.436	10663000	13116000	10650000	3943700	3350400	13268000	0	0	0
ATSLVVDSGGGSTTVAPVHDGYVLQK	26	2557.3	86.761	71284000	93343000	77375000	24232000	0	0	19209000	18779000	9261000
ATSPAEEVAQDFSPFLK	17	1835.89	142.12	0	92965000	129650000	0	93574000	54811000	214220000	0	190120000
ATSSIYPLQNVFIR	14	1607.87	137.95	522840000	525080000	491020000	127630000	250650000	0	91762000	80956000	36128000
ATSVGEK	7	690.355	85.265	0	67302000	24956000	0	18661000	45221000	0	0	0
ATTEEESAVKEPLDLIR	17	1899.98	190.1	57377000	40959000	53086000	0	39105000	0	0	0	0
ATTETVDALR	10	1075.55	46.462	0	0	0	0	0	0	13847000	11583000	5377900
ATVIPTSEEDSALAVVR	17	1756.92	134.08	0	34347000	0	0	0	0	7396900	8370000	3052900
ATVNMLHR	8	940.491	79.597	34835000	30528000	44462000	13300000	8079300	9498300	61040000	15350000	9039100
ATVNTFGYIAK	11	1183.62	70.256	4844700	7166200	6112200	3263800	0	0	0	0	0
ATVPGQLIWEIVK	13	1452.83	119.34	1994000000	791880000	95998000	16262000	100350000	0	299510000	593610000	38270000
ATVPGQLIWEIVKK	14	1580.93	77.288	0	385110000	869480000	79085000	302560000	0	0	0	0
ATVVLVNGLQQR	12	1296.75	56.563	4084700	4561200	2619000	0	0	0	0	0	0
ATVVNVAADGTITR	14	1386.75	63.408	0	0	0	0	0	0	8331700	0	4660200
ATVVQASTIFYDTPATLDK	19	2040.04	92.457	0	0	0	0	0	0	8963400	17850000	5738100
ATVVQASTIFYDTPATLDKAER	22	2396.22	19.897	0	0	0	0	0	0	0	7302900	7132100
ATYQTSGK	8	854.413	104.37	43934000	22348000	19432000	32705000	17333000	0	29961000	51380000	17761000
ATYTLKEDGTVNVVNETWTDGKR	23	2596.28	38.933	0	0	0	0	0	0	6960300	0	9350800
AVADIIR	7	756.449	86.838	26069000	33405000	23029000	6355100	10435000	0	17595000	0	11960000
AVADYVHAK	9	972.503	63.48	72421000	72345000	63374000	47614000	47537000	45202000	328890000	208940000	115300000
AVAEAIQR	8	856.477	102.8	39425000	26048000	28987000	39767000	31681000	64271000	68281000	104340000	113040000
AVAEQAAWEVAK	12	1271.65	51.445	4677900	2016300	0	0	0	1948700	0	0	0
AVAFDEIDKAPEEK	14	1560.77	72.006	39794000	43708000	41291000	33324000	37504000	0	34877000	44195000	20960000
AVAGAGVLAGYDK	13	1190.63	93.258	163310000	164060000	52893000	80909000	21294000	0	213950000	0	95887000
AVAGAGVLAGYDKLQVLVFGK	21	2075.18	22.108	0	0	28731000	0	0	0	0	0	0
AVAHFPTAVK	10	1039.58	43.492	8769200	7474200	8611300	8416500	9789600	0	0	0	0
AVAIENALR	9	955.545	77.674	6387000	6381500	6403600	2802700	0	4885100	0	0	0
AVALNAGSK	9	829.466	71.379	26621000	22870000	31637000	6705400	3635700	7476500	0	0	0
AVALVLPTLK	10	1023.67	105.57	967170000	625140000	853940000	2456600000	1809000000	2429100000	1143700000	1586100000	499460000
AVAMSATDGLMR	12	1221.58	116.3	537470000	420590000	546140000	1080700000	909530000	1645600000	2216100000	2625300000	1098000000
AVANHTTAAFIR	12	1270.68	59.198	35783000	26329000	19610000	11525000	0	0	32942000	25579000	9621800
AVANQPVAVAIEGGGR	16	1507.81	133.07	50134000	8344900	49266000	23923000	0	49354000	0	0	0
AVANQPVSVAIEAGGR	16	1537.82	48.741	2563800	4000900	3359200	0	0	0	0	0	0
AVANSTSATFLR	12	1236.65	102.06	25125000	26855000	19973000	9851300	0	19373000	27664000	29231000	15143000
AVAQYASESGNGK	13	1280.6	54.608	0	1772700	2238300	0	0	0	0	2173100	0
AVASEGGISPLVK	13	1226.69	56.548	0	0	0	0	0	0	6928400	8033700	6850100
AVASEGGTEDAKR	13	1289.62	60.434	0	0	0	0	0	0	6846600	0	0
AVATEGQETNVVTDYVLK	18	1935.98	99.215	0	0	0	0	0	0	20053000	16407000	2408800
AVATISAGNDELIGAMIADAIDK	23	2258.15	170.79	0	51693000	0	0	0	94281000	0	138020000	12316000
AVAVAVR	7	684.428	105.42	18239000	21005000	17429000	0	22121000	0	28465000	36473000	34947000
AVAVVVDPIQSVK	13	1323.78	107.24	129510000	145710000	133900000	59245000	0	0	0	0	0
AVDDGVNTYK	10	1080.51	91.069	0	0	13945000	0	8380500	12773000	0	14413000	10372000
AVDEGYDVSK	10	1081.49	83.783	83240000	84203000	50107000	44172000	58590000	83742000	110420000	118690000	140020000
AVDEGYDVSKLHK	13	1459.73	33.204	0	0	37905000	0	0	0	0	0	0
AVDEYKEAK	9	1051.52	69.812	58890000	49833000	141340000	6608100	27204000	13409000	0	0	0
AVDFVAHQSDFLEK	14	1604.78	199.8	196150000	185900000	119600000	29551000	0	0	4000200	0	2328600
AVDGGDPSVDDTSLIQTAQR	20	2043.97	43.991	0	0	0	0	0	0	0	0	0
AVDGIFHVLR	10	1125.63	96.331	119440000	108030000	96498000	56860000	43540000	82227000	21916000	37777000	10158000
AVDGQDEYYNLILNFK	16	1900.92	19.173	22967000	15195000	16216000	40632000	0	0	0	0	0
AVDGSYVFNK	10	1098.53	86.833	50675000	48918000	35229000	22453000	13278000	30314000	36581000	42894000	24161000
AVDKNYHLK	9	1086.58	38.776	0	8567300	22181000	0	0	0	0	0	0
AVDNSGTVIGIK	12	1172.64	107.15	21672000	24269000	18190000	11263000	9556100	15352000	35657000	39292000	15520000
AVDSLVPIGR	10	1025.59	138.54	123690000	127350000	119060000	68211000	380040000	404360000	321930000	358150000	121480000
AVDTMLVER	9	1032.53	43.083	0	0	0	0	0	0	0	4460600	0
AVDVTGPDEAPVQGSR	16	1596.77	114.72	71780000	118530000	83368000	9904800	23612000	32859000	25443000	24129000	11377000
AVDVVANELIAISKPGEVDQVQLDR	25	2677.43	100.08	49023000	35947000	19016000	24542000	0	0	26319000	30176000	8602500
AVDYLNSLDK	10	1136.57	98.033	0	0	0	0	0	32182000	13520000	17539000	0
AVDYLYSGIPEAAEVAVPVAR	21	2189.14	116.96	0	35086000	18896000	0	0	0	0	0	2976500
AVEAGDSGSSSALPSK	16	1461.69	78.692	13981000	9956500	9447600	10564000	8187500	8244400	13769000	11491000	6885800
AVEAPIR	7	754.434	86.086	0	0	0	0	0	0	14742000	15554000	6430900
AVEASENERPIPDIR	15	1694.86	41.399	56222000	43345000	58626000	43873000	61472000	60296000	48704000	81762000	34234000
AVEAYAYLETSR	12	1371.67	103.22	0	0	0	0	0	0	38563000	25192000	14998000
AVEDELEK	8	931.45	89.296	15131000	18028000	7740300	18758000	0	18781000	47254000	26505000	16985000
AVEEELEK	8	945.465	98.997	30727000	0	12276000	24530000	12770000	34934000	0	0	0
AVEETTEWVER	11	1347.63	52.79	8518000	4200000	4210500	2454100	0	2361100	0	0	0
AVEEYKEAK	9	1065.53	105.57	73651000	76009000	150710000	12680000	38322000	11272000	0	0	0
AVEFAFR	7	838.434	118.06	36097000	39297000	5755100	9756900	0	0	23304000	26545000	6540300
AVEIALQQVK	10	1097.64	70.525	3349100	6455100	4008700	0	0	4981400	3716000	0	1157300
AVEIHHGWYTPTPAATA	17	1820.88	121.9	45216000	19316000	34969000	25828000	195860000	279680000	44876000	43847000	17389000
AVEKEFEMALQDR	13	1564.76	102.4	79469000	86334000	19518000	15165000	0	0	0	0	0
AVELIASHLR	10	1107.64	109.11	8692500	11000000	5592500	3299400	0	4874500	4757800	5011600	2498600
AVELLEEAVK	10	1099.61	107.69	30701000	32389000	27177000	12790000	0	29173000	0	0	0
AVELSPENAR	10	1084.55	76.679	2588700	4218100	2341900	0	0	3829100	9275500	8152400	726360
AVELTVDQVEK	11	1229.65	76.943	7130300	7995000	1713200	3488700	0	0	16880000	14523000	0
AVELVAGK	8	785.465	79.469	252660000	171530000	109480000	40546000	112520000	125500000	145430000	103010000	20036000
AVELVAGKESAIAQVVR	17	1738.99	65.179	0	0	0	0	12707000	0	0	0	0
AVEMFHR	7	888.428	64.776	0	0	0	0	0	7509400	50814000	21547000	16364000
AVEMFIDEK	9	1080.52	58.981	6475400	4330800	0	0	0	0	0	0	0
AVEMFNR	7	865.412	106.29	14594000	14993000	0	0	3710600	13956000	0	0	0
AVEMMLSSKPILSEEGKK	18	1976.03	27.271	0	0	0	0	0	0	7425300	10425000	3479600
AVENNSLSAIDK	12	1259.64	85.958	0	0	0	0	0	0	25193000	16468000	5467600
AVENSPFLEK	10	1132.58	124.23	125550000	194410000	122410000	47884000	38311000	81977000	110540000	130360000	49962000
AVENSPFLER	10	1160.58	124.23	87567000	106180000	65757000	31511000	20849000	31425000	21485000	21105000	40850000
AVENVNTIIGPALIGK	16	1607.92	130.56	92904000	105340000	40143000	38240000	47517000	82232000	31529000	38655000	12283000
AVESLNGK	8	816.434	90.986	35559000	0	0	7127800	0	16293000	0	0	0
AVETAESAK	9	904.45	82.241	0	0	0	1962900	0	5108000	1290400	0	1889700
AVETALDGQTDYAAAR	16	1650.78	71.555	6033000	5646200	8752400	2939800	0	3081600	11101000	9465700	5662900
AVFDSWDSPR	10	1178.54	123.98	0	0	0	34290000	0	0	44970000	45759000	10602000
AVFGEVYPDPVR	12	1347.68	76.228	35706000	46561000	39921000	0	0	0	27985000	0	10784000
AVFNKEEDIGTFTIR	15	1738.89	73.834	148680000	107900000	84600000	0	0	0	0	0	0
AVFNLDYGQLK	11	1266.66	65.305	0	0	0	0	0	0	3223400	5863400	2723900
AVFPSIVGR	9	944.544	74.127	264170000	279220000	95634000	144300000	0	519770000	177720000	203990000	50786000
AVFVDLEPTVIDEVR	15	1700.9	174.24	1603400000	1785500000	919440000	166990000	476470000	0	78808000	83358000	17980000
AVGDDIIK	8	829.455	60.799	0	0	0	0	0	0	9782700	0	2925800
AVGDWFYDR	9	1127.5	155.1	152460000	110750000	117050000	141160000	334780000	256920000	115340000	86144000	50400000
AVGESVDHPR	10	1065.52	54.157	1986400	2434000	0	462390	0	25287000	0	0	1568500
AVGGALELSQLTGSR	15	1457.78	50.207	0	0	0	0	0	0	0	6306000	3830300
AVGGGASPR	9	770.404	55.531	8318200	5531800	6917200	6174400	7104500	9261200	12852000	22230000	4708500
AVGGLHDPLIK	11	1118.64	20.834	0	0	0	0	0	0	2468100	0	1491400
AVGIYASLVNINAYHQPGVEAGK	23	2370.23	40.381	0	0	0	0	0	0	13154000	10708000	0
AVGLDFLTK	9	962.544	63.673	0	0	12328000	15614000	0	0	0	0	0
AVGNVNTIIGPALVGK	16	1521.89	103.22	30034000	26622000	13905000	13011000	0	0	10203000	8806500	2721800
AVGNVNTIIGPALVGKDPTEQTK	23	2321.26	90.193	261120000	230070000	144910000	117890000	148350000	157260000	44016000	50865000	25963000
AVGQFTVVANMR	12	1291.67	43.982	1579500	2448800	0	0	0	0	3252900	5567400	2226200
AVGVAGSPR	9	812.45	73.616	3128700	2765800	0	5595300	5284800	10727000	52318000	62545000	19299000
AVGVEHIPELVASSIQNIQK	20	2131.16	14.89	0	0	0	0	0	0	8763900	0	0
AVGVLYQVVDDILEEK	16	1788.95	52.903	131790000	65327000	15632000	0	0	0	0	0	0
AVHLEPVPFDIDR	13	1506.78	39.424	0	0	0	0	0	0	9466500	10087000	1792800
AVHLEPVPFDIDRDLITPTYK	21	2438.28	29.766	0	0	0	0	0	0	7487600	10435000	2292800
AVHPIALAK	9	918.565	38.776	3846500	4819000	5798600	0	0	0	5360100	6840400	3001600
AVHSAQAYGMNDEFSR	16	1781.78	55.866	11438000	9783300	7047400	3984200	0	7850500	17775000	18554000	4233000
AVIEAPPGIK	10	993.586	61.999	13615000	0	0	0	13865000	13351000	0	0	0
AVIELENYGLPFSR	14	1606.84	178.46	0	0	0	0	0	0	44321000	38856000	13716000
AVIGGSEGR	9	844.44	48.561	0	0	0	0	0	0	0	0	0
AVIILPTK	8	853.564	94.662	4640700	5340000	2350100	3235700	0	7354500	11126000	6212400	2042200
AVIISWVTPDAPGSNK	16	1653.87	118.77	36001000	27327000	17436000	0	0	0	7549500	5474700	2767800
AVINDGLK	8	828.471	72.138	0	0	0	0	631790	5386900	0	0	0
AVIPESVLKK	10	1082.67	25.045	0	2355200	7448300	0	0	0	0	0	0
AVIVATNMLESMIVHPTPTR	20	2179.15	105.38	20637000	36407000	10944000	0	0	0	0	0	0
AVIVLQGR	8	854.534	146.21	114480000	91867000	116600000	30316000	57568000	62180000	52253000	57780000	28032000
AVIVQAIK	8	840.543	60.294	0	0	0	0	0	0	11417000	16136000	5650800
AVLAVAHLER	10	1077.63	67.726	27013000	35146000	24869000	11934000	4782900	19752000	18636000	31035000	9095100
AVLDAATIAGLHPLR	15	1516.87	57.136	261050000	276260000	0	80607000	0	0	26693000	23004000	12536000
AVLDQLADYFR	11	1309.67	207.68	0	0	0	0	0	0	28225000	34200000	16758000
AVLEQGITVVVK	12	1254.75	76.943	17302000	18648000	0	0	0	0	0	0	0
AVLFVPPK	8	869.537	88.734	46246000	64013000	21987000	9193800	10559000	37599000	19034000	21374000	5394900
AVLGDEEYFR	10	1197.57	78.334	15672000	8220800	10502000	0	0	0	4106900	6438600	6880000
AVLGGSG	7	559.297	110.17	950190000	727970000	1130500000	999320000	1612900000	1892500000	6617400000	4748700000	2853600000
AVLLAGQPGTGK	12	1110.64	77.662	7211500	13179000	8642200	5707400	4661000	7901800	9366200	9732700	3791400
AVLLWTLDPAER	12	1382.76	140.75	168720000	133430000	47555000	25896000	0	0	27519000	28687000	9615200
AVLLWTLDPAERDALLAYDSTR	22	2488.3	64.265	170490000	45397000	15184000	30759000	0	0	0	0	0
AVLLWTLDPAERDALLAYDSTRR	23	2644.4	25.619	71658000	55153000	0	0	0	0	0	0	0
AVLMDLEPGTMDSLR	15	1646.8	151.1	302090000	495570000	324960000	56899000	116310000	147040000	22155000	22916000	5761700
AVLMDLEPGTMDSVR	15	1632.79	138.45	106630000	98341000	316100000	22639000	278380000	281730000	100050000	101670000	31397000
AVLMDLEPGTMESIR	15	1660.82	119.45	38007000	39665000	33218000	0	0	0	0	0	0
AVLNAIDYLSK	11	1205.67	86.624	0	0	0	0	0	0	26631000	29206000	17050000
AVLNIGPNEPSQLAINENANGLAR	24	2474.29	74.214	0	0	0	0	0	0	25901000	22030000	13805000
AVLNIGSNEPSQLAINENANGLAR	24	2464.27	137.12	227600000	196310000	98981000	96451000	0	0	19376000	23341000	8919700
AVLPANFK	8	858.496	77.374	100130000	110500000	103180000	52790000	32383000	61702000	93740000	88613000	51736000
AVLSLVSQPAVDEQIR	16	1723.95	143.97	40699000	38396000	21907000	17701000	0	0	11263000	11277000	4331500
AVLVDKDQNPK	11	1225.67	64.04	3604200	6080400	4069800	2299700	5852000	0	0	0	0
AVLVPALEGR	10	1023.61	70.919	6905600	10346000	7325000	6145400	18813000	0	0	0	0
AVLVQIANPAR	11	1150.68	60.59	3368300	3422300	0	2154000	0	8671500	0	0	0
AVLVQTEPR	9	1011.57	124.08	10939000	12102000	12832000	8705900	8507200	13690000	18428000	25249000	7704500
AVLVVQQNLTPFAR	14	1554.89	131.28	56374000	37626000	36823000	0	3335700	10147000	5208900	0	0
AVLYIVAQSLGAIAGVGLVK	20	1941.17	19.791	0	28785000	0	0	0	0	0	0	0
AVMLADIAHISGLVAAGVIPSPFEYADVVTTTTHK	35	3593.88	11.976	0	0	0	0	66690000	0	0	0	0
AVMSELFGK	9	980.5	61.999	49950000	50936000	37273000	16754000	72687000	0	7194400	7948400	2435600
AVNAAPK	7	669.381	82.263	33915000	30519000	25633000	23465000	22621000	0	0	0	0
AVNDVPASKPTAAPPQPVDVSK	22	2187.15	20.256	15721000	19091000	23192000	0	0	5407600	0	0	0
AVNIPDVVVFPR	12	1324.75	57.598	0	0	0	0	0	0	6509300	7361700	1867700
AVNITINSIGTELTR	15	1600.88	191.29	54239000	38175000	26900000	33968000	0	31751000	17111000	18828000	4895700
AVPTEDAK	8	829.418	69.998	10541000	11633000	3970500	5854400	0	11887000	0	0	0
AVPYDPKYHEEWIR	14	1801.88	39.509	0	0	5088000	0	0	0	0	0	0
AVQAQEGIAALR	12	1225.68	166.07	29661000	32694000	10175000	15988000	0	31613000	24140000	25760000	8991900
AVQAVLK	7	727.459	84.359	0	0	0	0	0	0	20400000	12100000	5705900
AVQELLGK	8	856.502	67.903	15511000	0	0	5046600	5818900	6086000	0	0	0
AVQGNVGQVLDQKDER	16	1754.89	59.634	0	0	0	0	4222500	0	14597000	17631000	5314400
AVQIAYEAR	9	1019.54	94.806	10068000	15689000	10635000	0	8169100	10789000	0	27605000	6991500
AVQNIYQQGGR	11	1232.63	167.9	69337000	49960000	51943000	25518000	58448000	34645000	54782000	44586000	20128000
AVQPNSSTK	9	930.477	84.568	42533000	0	42628000	19613000	35483000	33892000	78694000	83927000	25839000
AVQQQLAPEFR	11	1285.68	74.92	4162900	5714400	5976700	1715000	0	3730600	0	0	0
AVQSGLGTAAVIVMDK	16	1558.84	68.44	0	0	0	0	0	0	9184100	5155700	4898500
AVRPIIEGR	9	1009.6	87.308	17591000	25046000	16271000	8780200	0	17117000	15993000	11541000	4791600
AVSAIVSFLLGPK	13	1300.78	130.94	0	4782300	0	119780000	0	35342000	105870000	108050000	28692000
AVSAIVYVVDAADPDNLSTSK	21	2134.08	36.805	0	0	0	0	0	0	3866500	4313800	2769000
AVSALDR	7	730.397	84.244	1312900	0	0	0	0	0	42184000	54428000	13881000
AVSAVSSGASGMR	13	1178.57	70.1	2732100	2523200	2328700	1063600	0	3281000	3870800	0	1076300
AVSEGMVGQAAAR	13	1245.61	87.149	11504000	18057000	17824000	8229500	2832300	10532000	10845000	15707000	5645400
AVSGLANMYR	10	1080.54	119.29	0	0	0	0	8096300	0	0	0	0
AVSLAIAR	8	799.492	100.67	51146000	52884000	50468000	19220000	23534000	49676000	0	0	0
AVSLVLPQLK	10	1066.67	119.41	227260000	190560000	215400000	644730000	507770000	640010000	292600000	445600000	127490000
AVSMFENDER	10	1196.51	68.224	3936700	4807000	2204700	0	0	2965200	0	0	0
AVSNLTR	7	759.424	110.63	91468000	85471000	61907000	94243000	104000000	147280000	0	0	0
AVSSDSQMK	9	951.433	45.081	3144600	5642500	2954000	3295100	0	0	0	0	0
AVSTEDAK	8	819.397	86.472	43677000	35430000	37900000	10052000	30869000	33136000	0	0	0
AVSTEEGEQFAK	12	1294.6	130.66	12325000	11550000	3372100	8897800	3383800	12857000	0	0	0
AVTAAPTK	8	757.433	79.469	74072000	66529000	66698000	16914000	53448000	0	24805000	26969000	12092000
AVTAATNYNNR	11	1193.58	225.4	6018400	8106900	4501100	0	9546300	7771300	15414000	30625000	7234400
AVTAKDEAELSK	12	1260.66	88.495	36371000	35612000	11493000	7789600	0	20542000	34582000	27193000	11391000
AVTAKDEAELSKLQSEEK	18	1975.01	123.55	9676300	6984400	49827000	0	40475000	0	0	0	0
AVTEEFEAAR	10	1121.54	55.549	3145400	4508700	3016700	1539200	0	0	0	0	0
AVTFSDLHTEAGLK	14	1487.76	154.24	656270000	693930000	602210000	226420000	813260000	45541000	73046000	86854000	0
AVTFYDLGSAAGLK	14	1411.73	138.25	83547000	118030000	77576000	59805000	0	77493000	13094000	14459000	241620000
AVTFYDLGSAAGLKK	15	1539.83	64.374	0	0	0	0	0	0	10939000	13637000	7000200
AVTIFIR	7	818.501	82.263	0	0	0	0	0	0	0	0	0
AVTITLNIQK	10	1099.66	92.439	32796000	36088000	13057000	11302000	0	0	0	0	0
AVTSAYYR	8	929.461	69.176	31505000	31020000	22232000	6510800	18158000	18316000	0	0	0
AVTVFGHR	8	885.482	118.01	0	0	0	0	0	24456000	0	0	0
AVVAFAR	7	732.428	113.82	7621800	5435700	0	6676700	8663600	13962000	12629000	19728000	7209600
AVVAQFNADQLLTDRPHVSALVR	23	2519.36	134.29	272700000	322650000	52347000	0	0	0	32234000	42860000	8079000
AVVAQYNASQLITQR	15	1660.89	220.25	114240000	88178000	238310000	102220000	192720000	135080000	45010000	52292000	28330000
AVVDSSVFNGDLASAVNHIFHLPETFEK	28	3042.51	53.259	129970000	111870000	0	10450000	0	0	0	0	0
AVVEEEK	7	802.407	86.086	3335300	2663600	2520300	11098000	10110000	22567000	134930000	107310000	53322000
AVVEGVPANSFLEINPR	17	1810.96	44.299	0	0	0	0	0	0	11857000	13959000	5461300
AVVEPLKNPAWL	12	1335.76	101.64	60562000	64150000	93955000	112160000	0	0	53078000	63574000	23361000
AVVGLPLGDPSMK	13	1282.7	60.518	0	0	0	0	0	0	12773000	15594000	6520400
AVVIHVPYR	9	1052.61	111.28	181380000	194790000	169430000	34161000	34697000	82911000	48814000	54758000	36824000
AVVLWNR	7	856.492	119.23	0	0	0	6746100	0	7797900	16464000	17270000	10659000
AVVPPPPQPPTQVK	14	1453.83	58.37	18739000	10583000	9626800	33504000	9253600	28230000	49028000	32630000	27655000
AVVQVFEGTSGIDNK	15	1562.79	172	237350000	176110000	19622000	93771000	0	226300000	133160000	147680000	37965000
AVVSEHR	7	796.419	97.071	64735000	43315000	9195700	20131000	0	0	52805000	58232000	10443000
AVVSEHRQELER	12	1451.75	50.354	24317000	21168000	22677000	13064000	21745000	0	42008000	31923000	38709000
AVVSNASMWDTLK	13	1420.7	97.456	0	0	0	0	60578000	0	12646000	17763000	0
AVVTVPAYFNDSQR	14	1565.78	113.63	780370000	689520000	675760000	507310000	0	62068000	282060000	390680000	152020000
AVVTVQPTVTGFFK	14	1492.83	140.3	34387000	52939000	54236000	22810000	0	35978000	16472000	18908000	2175100
AVVVEISR	8	871.513	79.469	0	0	0	6819500	4671000	8957400	11059000	14788000	0
AVVVHGDPDDLGR	13	1348.67	86.898	203410000	345590000	183420000	93935000	71383000	130230000	258580000	178390000	213170000
AVVVHGDPDDLGRGGHELSK	20	2057.03	47.222	0	0	165160000	0	0	0	0	0	0
AVVYALSPFQQK	12	1349.73	103.8	35911000	29272000	36150000	13249000	4483300	0	8656600	0	10139000
AVYAHWVPEDR	11	1341.65	89.247	21458000	27389000	19304000	2355800	0	0	0	0	0
AVYECLR	7	909.438	107.55	97382000	45027000	149460000	268550000	53409000	322490000	855190000	850290000	394940000
AWAGKEENIPK	11	1241.64	83.499	194780000	185120000	262680000	81142000	0	56887000	124570000	180130000	112120000
AWAQSYPDNK	10	1178.54	137.9	70479000	68923000	60864000	30557000	41788000	40446000	73167000	78457000	47570000
AWDAFGR	7	821.382	93.593	5434600	5219600	2709100	2465700	0	5337000	8239900	0	2726200
AWDDHWIFWVGPFIGAAIAAFYHQFILR	28	3346.69	43.494	0	9832400	0	0	0	0	0	0	0
AWDLEENVVK	10	1201.6	67.897	0	0	0	0	0	0	9187100	9260000	7133400
AWDLVIEQR	9	1128.59	73.665	0	0	0	0	0	0	11233000	7550200	4794300
AWEESEK	7	877.382	100.74	30773000	10547000	9551700	49533000	44563000	87214000	104740000	124230000	43109000
AWEESEKTK	9	1106.52	113.26	0	0	0	0	0	0	17969000	25574000	20524000
AWEVAQAPLK	10	1111.6	52.716	0	3162400	2947300	0	0	0	0	0	0
AWEVDTLR	8	988.498	89.55	16757000	24347000	12923000	7935600	0	28179000	0	0	0
AWIEEMGK	8	962.453	68.915	0	0	0	0	0	0	5478900	10024000	0
AWIYSVYGK	9	1085.55	75.109	13537000	0	5734100	0	155280000	156530000	55675000	49649000	23471000
AWLEDGKDVR	10	1187.59	47.844	18034000	20126000	10893000	8615400	0	0	18444000	20852000	8809000
AWLSNVAAR	9	986.53	54.157	0	0	0	0	0	9446200	0	4293600	1385900
AWLYDNLGSR	10	1193.58	46.462	0	0	0	0	0	22243000	8005700	7878300	2306600
AWLYDNMGSR	10	1211.54	81.594	21113000	18918000	15141000	9229900	15841000	31382000	15683000	10506000	9116100
AWMAAQDQPHENLIFPEEVLPR	22	2590.26	316.79	1421500000	943350000	1146400000	4324900000	1091000000	5383100000	4300600000	3723100000	1065600000
AWPYVQNDLR	10	1260.63	111.17	375060000	197790000	420350000	590210000	0	1268900000	174730000	202170000	82270000
AWQILDQIPGR	11	1295.7	108.98	0	0	0	0	0	0	10045000	7486700	5915100
AYAAMKPTKPGLEEPQEQIHK	21	2365.21	96.143	272930000	302390000	331560000	103240000	216460000	573310000	124660000	176650000	60898000
AYAAPAELLGR	11	1130.61	85.731	0	0	0	0	0	0	0	0	7871000
AYASNMGGYK	10	1060.46	82.279	11691000	9424300	0	15099000	4121200	18093000	54274000	59888000	4903800
AYAVGASFK	9	912.471	103.74	14134000	12372000	17645000	17792000	16877000	13435000	42908000	51754000	20752000
AYDFVSQEIR	10	1226.59	81.594	738620000	462940000	521400000	1756200000	1905200000	3486700000	0	0	0
AYDGVVTK	8	851.439	111.01	57854000	32784000	51775000	140710000	127120000	177330000	646210000	651340000	335520000
AYDIFSR	7	870.424	107.43	0	0	0	0	0	23130000	11948000	9344000	9955600
AYDIWDGVPEGHVFTGKPQER	21	2400.15	36.111	93029000	0	34575000	36608000	36965000	0	9717400	22606000	13810000
AYDLTKDEAHTLANSQDGVMIITLPK	26	2843.44	35.94	0	0	0	0	0	0	12679000	8673900	5522500
AYDRNPDLANLLVDPEFSK	19	2176.08	22.902	0	0	0	0	0	0	9098900	11181000	2658300
AYDVLIPDQGIALR	14	1542.84	138.25	2837900000	2209000000	2595600000	2760300000	3379300000	3553000000	1371000000	1456100000	722560000
AYDYIHER	8	1065.49	47.198	0	0	0	0	0	0	11395000	11522000	7003100
AYEALGSAEK	10	1037.5	55.235	0	0	0	0	0	0	20793000	23338000	0
AYEGILLGMGNPLLDISAVVDEEFLK	26	2805.45	83.701	0	37343000	0	0	0	0	0	0	0
AYEGIPPPYDK	11	1248.6	47.823	2905600	4639700	3622500	0	0	0	0	0	0
AYEGVPPPYDK	11	1234.59	59.153	16814000	22666000	12198000	3827900	2835000	11298000	0	0	0
AYELGLATR	9	992.529	88.948	30178000	32359000	25160000	16832000	0	34363000	64167000	36464000	24695000
AYEPILLLGR	10	1143.67	122.13	601200000	581830000	582150000	156290000	0	276300000	73438000	96679000	40176000
AYETASTTAEAELPPTHPIR	20	2154.06	37.624	13301000	24462000	0	2492500	27669000	22826000	10832000	14695000	2443500
AYETATTTAEAELPPTHPIR	20	2168.07	18.296	8464500	3898500	7808200	3560000	0	0	15870000	14293000	3812400
AYEYIEDILLK	11	1368.72	89.247	0	83723000	0	38141000	0	0	14790000	15391000	5643000
AYFATAQSVR	10	1112.56	90.657	0	0	0	0	5487500	16350000	0	0	0
AYFEAVALK	9	1010.54	79.469	49998000	32109000	11971000	20279000	0	0	31472000	31638000	5396300
AYFPDHSVFDR	11	1352.61	47.559	5390100	7389000	9721200	0	7255400	0	0	0	3001000
AYFQEFSHLDSK	12	1470.68	83.862	81984000	107200000	73832000	26155000	41852000	0	24434000	22213000	14154000
AYFVINYSK	9	1103.57	81.548	41874000	0	0	19438000	52055000	0	15785000	15656000	4263500
AYGELPESTR	10	1121.54	85.676	8483200	8945300	9008700	6847800	8639500	9710500	0	0	0
AYGGVLSGGAVR	12	1105.59	85.731	245880000	308260000	231500000	83849000	47017000	206460000	90305000	110710000	63535000
AYGSTLDLVSVQK	13	1379.73	92.538	0	0	0	0	0	0	0	0	23903000
AYGTPSYWVQR	11	1326.64	59.245	0	0	0	0	0	0	11476000	17864000	3952000
AYGVNSIVLFPK	12	1306.73	93.649	0	167950000	117820000	0	0	118960000	0	0	0
AYGVNVVVAVNK	12	1231.69	90.657	0	0	0	0	0	0	0	8780400	0
AYHDSLFMAR	10	1209.56	43.635	5920700	8184500	10365000	0	0	0	0	0	0
AYHEQLSVAEITNSAFEPSSMMAK	24	2640.22	63.979	41232000	51366000	0	0	0	0	0	0	0
AYHEQLSVPEITNAVFEPSSMMAK	24	2678.27	21.647	0	0	0	0	0	0	7291900	7332500	2293100
AYHSLFDR	8	1007.48	62.546	8462100	5584300	3901500	7213400	5839800	18886000	28673000	13263000	8648900
AYILEDSYNQLR	12	1483.73	39.305	0	0	0	0	0	0	0	3782100	636570
AYIPDVLNQFK	11	1306.69	95.741	128470000	132430000	108890000	22426000	0	74926000	0	0	0
AYISGFTGSAGTAVVTK	17	1628.84	55.314	0	0	0	0	0	0	8412900	10287000	0
AYLEDFYK	8	1047.49	77.282	25111000	21552000	10243000	8418700	0	0	5830800	5642100	2952900
AYLEEYDYR	9	1220.54	62.2	3758900	5080100	0	2938100	0	8122000	0	0	0
AYLFNDYWEDIGTIR	15	1874.88	65.842	0	0	0	0	0	0	121490000	0	0
AYLFPESPAR	10	1149.58	114.89	68589000	63982000	51467000	49729000	230750000	184350000	126650000	153620000	56250000
AYLGSSPK	8	821.428	77.282	20635000	22258000	11952000	0	14251000	28508000	0	0	0
AYLHAEADVER	11	1272.61	45.257	0	0	0	0	0	0	17162000	14029000	5609200
AYLPVIESFGFSSTLR	16	1785.93	184.03	0	398050000	110660000	0	0	0	266030000	0	0
AYLSAALTNK	10	1050.57	52.482	0	0	0	0	0	0	1856500	2226700	0
AYLSDLETR	9	1066.53	61.999	8552500	10544000	8918500	0	0	0	0	0	0
AYNDDDFIR	9	1127.49	161.9	63674000	57025000	21433000	13901000	18517000	36599000	24777000	28509000	11809000
AYNELGEYK	9	1085.5	77.282	12221000	13068000	9497400	10408000	11215000	14456000	22630000	22853000	11949000
AYNFGNGVTFGDGSVEVLAATQTPGEAGKR	30	3012.46	19.507	0	0	0	0	0	0	18268000	18220000	0
AYNGNLIAHLR	11	1240.67	42.109	7491100	10442000	8520800	0	0	0	0	0	0
AYNRPSENVDQSSSK	15	1680.77	28.089	4365400	5365800	3549900	1930100	0	0	0	0	0
AYPDAHVR	8	927.456	97.071	2614700000	1835100000	3228800000	4467000000	5020800000	4920200000	11651000000	11853000000	4503600000
AYPSWSPAAIK	11	1189.61	51.949	0	0	0	0	0	0	23207000	26155000	12037000
AYPVGQSVAQAK	12	1217.64	72.243	0	0	0	0	0	0	8462000	11699000	3159200
AYQALTDPISR	11	1233.64	59.426	0	0	0	0	3067600	0	0	0	0
AYQAVEQINWPGGFYR	16	1897.91	107.83	0	0	0	0	0	0	3882800	9010000	2027100
AYQVSGHMK	9	1019.49	73.26	4852200	4879400	5993400	3316000	0	0	20468000	16166000	16227000
AYSGQTPVQTPK	12	1275.65	126.07	12811000	7924300	15725000	8610000	8500500	12520000	0	15534000	10720000
AYSYAYDDPTSIATCTK	17	1925.84	91.858	0	0	13280000	0	0	0	0	0	0
AYTAQRPSDAYPVDIR	16	1821.9	31.614	4722500	6150400	4816200	0	0	0	0	0	0
AYTDYALDMGIITK	14	1573.77	89.805	63315000	49740000	35711000	15825000	0	0	13582000	13716000	8245600
AYTQSAATLNLLR	13	1420.77	123.79	22857000	45637000	28227000	0	0	0	9321000	10270000	0
AYTVEFGTCK	10	1174.53	126.41	7440700	6451800	7144600	7625100	0	16652000	23007000	18591000	13439000
AYVDDTPREEMQK	13	1580.71	29.303	0	0	0	0	0	0	8594100	10441000	2734800
AYVDQFSR	8	984.466	60.682	8509100	9417600	0	1721200	4184000	5891800	0	0	0
AYVIHWVR	8	1042.57	41.652	3030600	2767600	0	1330800	0	0	3459700	4527600	0
AYVNKLEQEGGK	12	1334.68	55.567	4419900	3632400	9901400	3726600	0	0	0	0	0
AYVPVADILDGEEVDR	16	1759.86	108.56	0	0	0	0	0	96992000	35306000	42067000	7671600
AYYATAESVR	10	1129.54	88.948	0	0	0	0	0	0	0	12537000	0
AYYETMADSELKK	13	1547.72	42.209	21085000	20326000	0	7415100	0	0	30202000	14742000	9241500
CAACAFPAAR	10	1093.48	91.041	3765100	3014300	5305100	2669000	4319500	5362400	5386600	0	0
CAAVTETVLAAVYK	14	1494.78	87.298	0	0	0	0	0	0	8708500	7736500	1864200
CDDATAGENPK	11	1176.47	79.148	6928100	3603500	9841000	4666600	3403800	10942000	8339700	6049400	3834100
CDDDPDIGIR	10	1174.49	93.701	0	0	0	0	0	0	21017000	10846000	3474600
CEAAPGCGEWK	11	1263.5	54.722	6693700	9230900	20164000	0	0	7590400	0	8112600	0
CEISASSDLEPVK	13	1433.67	43.308	2697800	3839500	5257900	0	0	2427900	5409000	0	0
CESACPTDFLSVR	13	1540.66	120.06	0	0	0	0	0	22104000	41377000	24119000	8615100
CGIAIEPSYPIKK	13	1474.79	35.737	0	0	0	0	0	0	0	0	0
CGSNVFWK	8	996.449	88.954	0	0	0	0	0	0	18554000	12960000	10920000
CGVSVPYK	8	908.443	94.662	124070000	122950000	333820000	51600000	48983000	112160000	160320000	78709000	149580000
CIGATTLEEYRK	12	1439.71	19.197	5366200	3058900	4031100	0	0	0	0	0	0
CLSDAGYFINTNDVSGAK	18	1930.87	63.091	0	0	0	0	0	0	11743000	0	4240800
CMEPVEK	7	891.383	86.866	0	0	0	0	0	0	4625100	0	3044900
CSPQITSSTPAK	12	1275.61	50.95	0	0	0	0	0	0	41621000	10225000	4014300
CTADINGQCPNELR	14	1646.71	122.69	2627900	3849600	6196000	2368300	1473300	5756000	24851000	9681400	14937000
CYTQADPVFDPSK	13	1526.67	43.308	4306200	3974200	8114800	0	0	0	0	0	0
DAAANNVK	8	801.398	62.717	29579000	20689000	15833000	24287000	16210000	38646000	0	0	0
DAAFGFSSLSDR	12	1271.58	52.79	0	0	0	0	14451000	0	4132700	0	1793400
DAALNAIQSPLLDIGIER	18	1908.03	136.33	0	0	0	0	0	0	101930000	80057000	0
DADGHGTHTASTAAGR	16	1523.67	28.212	11024000	11984000	6655900	0	0	6537000	0	0	0
DADLIILEGMGR	12	1301.66	51.927	0	0	0	0	0	0	3071200	0	0
DADMEQR	7	863.344	83.614	0	0	0	0	0	0	11320000	15891000	2938000
DAEDAIR	7	788.366	92.191	36705000	47268000	30290000	14436000	0	38872000	0	0	0
DAEFFEWQEK	10	1327.57	75.378	0	0	0	0	0	0	5916200	8584900	0
DAEGQDVLLFIDNIFR	16	1863.94	282.92	68008000	112870000	0	0	0	0	44900000	0	0
DAEMETEEVPTEK	13	1506.64	42.001	3337100	7218700	0	0	0	0	0	0	0
DAEPTEFEESVAQAIFDLENTNQELK	26	2966.37	149.41	173890000	90486000	18248000	0	0	0	115410000	86098000	21407000
DAFADQPGVLSAK	13	1317.66	104.82	25959000	26577000	20546000	15080000	53262000	0	16507000	23994000	14520000
DAFVAPSASIIGDVQVGR	18	1800.94	35.737	0	0	0	0	0	0	0	0	0
DAGAIAGLNVLR	12	1168.66	100.84	61941000	24877000	42870000	23455000	0	0	0	0	0
DAGEELLSR	9	988.483	101.64	0	28943000	0	0	9232300	23487000	0	0	0
DAGGFEALVSGK	12	1149.57	53.569	25870000	0	16863000	45852000	0	0	45307000	47697000	0
DAGIIAGLNVAR	12	1168.66	162.49	519570000	522860000	437870000	87114000	144400000	224720000	35637000	31871000	45325000
DAGLAAQQAER	11	1128.55	44.203	0	0	0	0	0	0	0	0	0
DAGTIAGLNVAR	12	1156.62	58.981	0	0	0	0	3299500	0	0	0	0
DAGTVFVAGATGLAGIR	17	1574.84	135.6	0	0	0	0	0	0	30318000	34107000	22878000
DAGVDIDAGSELVR	14	1415.69	77.744	0	0	0	0	0	0	10166000	14514000	0
DAGVEVDPLGDLNTESER	18	1914.88	225.23	110750000	101990000	48708000	44901000	61695000	93693000	27620000	25604000	12435000
DAGVEVDPLGDLNTESERK	19	2042.98	32.981	0	0	0	0	0	0	8164400	7713300	0
DAGVIAGLNVMR	12	1214.64	139.74	914290000	964010000	770180000	12576000	409120000	488830000	125630000	126020000	87343000
DAGVIASLNVMR	12	1244.65	159.79	67053000	42995000	49370000	56904000	0	0	7170400	9579900	18380000
DAGVSPAIVGSFPR	14	1371.71	41.283	0	0	0	0	0	0	11367000	8587100	7144600
DAGVVAK	7	658.365	79.454	17945000	12928000	18688000	36009000	44296000	0	0	0	0
DAGVVISYDPNLR	13	1417.72	88.681	71789000	62161000	0	0	0	70208000	20096000	26823000	6181600
DAHGDVFR	8	915.42	34.253	4478700	4765200	4011700	2763700	0	0	0	0	0
DAIDTKNQADSVVYQTEK	18	2023.97	53.773	8939500	6023700	27744000	9292600	9145700	7899300	6615200	13241000	20668000
DAIEAMNGQNLDGR	14	1502.68	113.63	66710000	93922000	54956000	12509000	19767000	23266000	19728000	21062000	14433000
DAIEATYIDK	10	1137.56	72.643	12024000	12953000	7044000	0	0	0	0	0	0
DAIEATYIDKK	11	1265.65	90.15	20177000	22771000	17774000	8970200	9117100	22267000	18372000	25288000	9866200
DAILALGRPAPVLVSEGANTMDIGR	25	2535.35	50.945	0	0	0	0	0	0	0	0	0
DAITPQAGELIR	12	1282.69	51.268	0	0	0	0	0	0	0	0	0
DAIVTLK	7	758.454	78.616	104120000	171340000	102060000	35987000	38348000	75683000	0	0	0
DALAETDKITLETAK	15	1617.85	133.32	48012000	40584000	7624900	14423000	0	71552000	79786000	105930000	7501600
DALDAIQALDGK	12	1228.63	118.6	125600000	154850000	47239000	0	0	0	25181000	22032000	5782500
DALEAMETQK	10	1134.52	96.034	45002000	31747000	11571000	19868000	10545000	5114500	42341000	50646000	24281000
DALGEVAVAR	10	999.535	57.96	8064900	7084800	7148900	0	0	8025100	0	0	0
DALHQGGVEHR	11	1217.59	53.751	64819000	79798000	31061000	14418000	11013000	61875000	55698000	54592000	17220000
DALIATR	7	758.429	84.244	18874000	22063000	8677900	0	7674600	24927000	0	23050000	6864400
DALIHVVTR	9	1022.59	59.597	5209500	5505900	0	4397800	0	0	6750200	8235700	0
DALIKGEEHVEK	12	1366.71	97.86	30663000	17490000	5796600	9673100	0	7225300	61697000	47654000	0
DALLAYDSTR	10	1123.55	107.15	20569000	24177000	0	4407700	0	17789000	21215000	21585000	0
DALLAYDSTRR	11	1279.65	117.01	25306000	21475000	7961200	7158400	0	7824000	15838000	13319000	4360600
DALQGTNFR	9	1020.5	63.48	0	3447700	3371800	0	0	0	0	0	0
DALSSESVR	9	962.467	69.825	4860000	5869100	3362900	4277500	0	0	15723000	8833000	10627000
DAMETASQSGDR	12	1266.51	117.7	9935000	8605000	0	4310300	0	14314000	24141000	29714000	2171000
DAMLNLLR	8	944.511	104.11	64601000	50721000	56147000	126120000	6958400	160820000	35161000	43482000	12289000
DANAALEINPDSAK	14	1427.69	146.16	39539000	55647000	38646000	10124000	13588000	19079000	28131000	34624000	32373000
DANIAALPVDELIEK	15	1609.86	63.662	0	0	0	0	0	0	12226000	13955000	3879200
DANPGGGGR	9	799.357	65.252	0	10525000	10399000	0	5443600	8687300	0	0	0
DANSIAPAIQGIDALIILTSAVPK	24	2390.34	138.08	477140000	491700000	77894000	63096000	92666000	0	101150000	130740000	130520000
DAPASVLPIIR	11	1150.67	64.485	0	0	0	0	26104000	0	14393000	12987000	8115800
DAPMFVVGVNEHEYKPELNVVSNASCTTNCLAPLAK	36	3973.9	16.214	0	0	0	0	0	0	10696000	0	0
DAPPLDNGLDPGFFAVFLVNVNKPSVVVR	29	3095.64	33.544	31337000	44314000	0	0	0	0	0	0	0
DAQVAPIR	8	868.477	117.93	22107000	20756000	15995000	5781900	12528000	0	33955000	33175000	7206000
DASAAAGLLEK	11	1044.55	74.841	7752900	11464000	0	0	5015100	10140000	14982000	16262000	6155300
DASDYLWYMTDVK	13	1605.7	88.948	0	0	0	0	0	0	7503900	3183100	0
DASEEEIWGSR	11	1277.55	96.331	4796400	5411400	0	1852600	0	4985300	4475500	7083200	2795000
DASLYGLGENTQPHGIK	17	1798.88	209.19	238600000	195590000	207520000	87202000	440930000	785470000	75127000	95310000	43029000
DASSTEK	7	736.324	89.55	0	0	0	0	0	0	0	0	0
DATDDFEDVGHSDSAR	16	1735.69	38.093	11433000	12323000	10243000	0	4925500	8209400	0	0	0
DATDDFEDVGHSDTAR	16	1749.71	60.49	11988000	10277000	4638600	4794800	0	15991000	24746000	19655000	7551200
DATDDKVTVESAEATLK	17	1791.87	194.98	50899000	54308000	33603000	25867000	104050000	30243000	33167000	50907000	15592000
DATDDRVTVESAEATLK	17	1819.88	79.393	15169000	23061000	12588000	6618400	0	0	0	0	0
DATELVAK	8	845.449	88.029	27006000	31593000	24069000	9856200	0	17037000	0	0	18430000
DATEVNHEDFNEGIIQVQAK	20	2256.07	28.083	0	0	0	0	0	0	10509000	13257000	4782200
DATIEQLLPIFLSLLKDEFPDVR	23	2671.45	77.681	0	0	0	0	0	0	18253000	7911800	0
DATNDFEDVGHSSSAK	16	1678.71	22.154	9151400	0	0	0	6275900	0	0	0	0
DATNVEQAFMAMAAEIK	17	1838.85	111.79	0	0	0	0	0	0	0	0	0
DATQVVANLQR	11	1213.64	80.787	6104000	6440300	3534900	0	0	0	0	0	0
DATTEGLVK	9	932.481	49.097	0	0	0	0	0	0	0	0	13191000
DAVDLDIR	8	915.466	65.252	0	0	0	0	0	4107900	0	0	0
DAVFSFIR	8	953.497	102.71	0	0	0	0	0	0	5761200	9537200	2003500
DAVLLVFANK	10	1088.62	107.29	59411000	65371000	8263000	16081000	0	57203000	9251400	12328000	0
DAVLQSLK	8	872.497	62.464	4952500	6149200	2047900	1821400	2527500	3808600	0	0	0
DAVTHLTDAQEWAGGGSMNGAISGSTQR	28	2816.28	21.618	0	0	0	0	0	28646000	39294000	47212000	27436000
DAVTYTEHAR	10	1161.54	124.23	1707400000	1346400000	2397300000	671390000	725190000	1486600000	1130600000	1352800000	568530000
DAVVTVPAYFNDAQR	15	1664.82	132.32	262330000	0	189770000	58175000	108520000	174790000	17035000	13117000	10882000
DAYANITANTR	11	1208.58	98.044	6456600	6753100	5331000	4795900	2670700	0	18393000	23191000	12469000
DAYVGDEAQSK	11	1181.52	107.21	143780000	184870000	72309000	67091000	90320000	122080000	261420000	325870000	79354000
DAYVGDEAQSKR	12	1337.62	95.094	197200000	221280000	179800000	92358000	170410000	57152000	173550000	183200000	213880000
DCYQGGGGGGGR	12	1139.44	40.352	0	1772200	2917100	0	0	0	0	0	0
DDAIHLYR	8	1001.49	45.081	10941000	11551000	0	4082900	0	0	0	0	0
DDASVFKR	8	936.466	31.074	2881700	3433100	3074000	0	0	3602200	0	0	0
DDEKMLFDIQK	11	1380.66	77.192	12927000	0	16602000	6947500	0	0	0	0	0
DDENVNSQPFMR	12	1450.61	204.07	1279000000	917720000	722600000	4137200000	2494300000	4619800000	10045000000	9131000000	3753400000
DDETLNGVVHR	11	1253.6	57.859	1792300	1946100	0	2063500	0	4894500	21630000	8617100	1557200
DDEVQVVR	8	958.472	122.78	54099000	55246000	39640000	13452000	0	39311000	41315000	27479000	9068900
DDFIEKDR	8	1036.48	116.73	1318500000	1275100000	423670000	3911000000	720620000	4625900000	8339000000	9288300000	3135200000
DDFLLIK	7	862.48	86.866	0	0	0	0	0	64422000	0	0	0
DDFLSDFFDPFSPTR	15	1804.79	227.37	1086400000	475290000	16350000	0	0	0	0	28449000	86875000
DDGTLASFVGFR	12	1283.61	60.102	0	0	0	0	0	0	5695100	6426600	1780300
DDHEPSLDDVLQPGK	15	1663.77	62.68	0	0	0	0	0	0	6562500	11142000	1352300
DDITVHAALSK	11	1168.61	54.094	3624000	4748400	0	0	0	0	0	0	0
DDLFNINAGIVK	12	1317.69	109.71	620040000	660110000	486620000	512560000	467690000	0	223190000	250080000	111050000
DDLFNINAGIVR	12	1345.7	143.03	0	0	131560000	342740000	325330000	0	224170000	285730000	55774000
DDLRLPTDDSLLTQIK	16	1841.97	91.657	0	0	0	0	0	0	17467000	25499000	4208300
DDNPIGATLIGR	12	1240.64	122.96	72233000	106720000	0	43739000	0	119520000	0	0	0
DDQPLVFGNPK	11	1228.61	57.59	0	3986200	0	4365200	0	10381000	10811000	6887300	5109200
DDRTDVILLK	10	1186.66	41.399	5362200	6025700	3695700	0	430730	0	0	0	0
DDRYLNEPALDTVKR	15	1803.91	19.672	0	0	0	0	0	0	0	0	3813500
DDTTFDAYVVGK	12	1329.61	83.499	36629000	26340000	0	7741600	0	20565000	8590600	9446800	3632200
DDTVILDGAGDKK	13	1345.67	32.545	12195000	24053000	6109800	0	0	10804000	0	0	0
DDVELVAVNDPFITTDYMTYMFK	23	2726.25	72.662	91761000	52397000	0	0	0	0	67246000	0	0
DDVLADFYNK	10	1198.55	59.35	0	0	0	0	0	0	4850900	0	0
DDVSGMQLSGNK	12	1249.56	66.056	0	0	0	0	0	3534100	8685800	0	1198900
DDVVRDDPTNNVPDTIFAK	19	2130.02	41.905	0	0	0	0	0	21682000	21161000	30017000	8943200
DEAAGPSIEELFTK	14	1505.72	97.911	0	0	0	0	0	0	8455800	5318000	1070800
DEAGEYLEESK	11	1268.54	96.342	17831000	23013000	0	2847800	0	21076000	9971400	8871000	0
DEAGEYLEESKLK	13	1509.72	41.092	22057000	24440000	7890200	5488200	0	0	0	0	0
DEALEPADLSDR	12	1329.6	88.681	1640500	1856600	0	3928100	0	7962600	32646000	33364000	3508100
DEAYFSNNAAAQASR	15	1613.71	30.872	0	0	0	0	0	3969000	0	0	0
DEDECQLPSR	10	1247.51	66.621	0	0	0	0	0	0	3750400	4737700	0
DEDHAYR	7	904.368	81.381	0	0	0	0	0	0	7788800	10472000	0
DEEGLSSDLGNR	12	1290.57	73.985	0	2978500	0	0	0	5756600	0	0	0
DEETLQPTVYLNK	13	1548.77	75.378	0	0	0	0	0	0	3872200	4888300	0
DEFIELAR	8	991.497	77.058	0	0	0	0	0	30964000	0	0	0
DEGFDDSDVNVTTLK	15	1653.74	98.407	0	0	0	0	0	26188000	9187700	8925100	0
DEGFLALWR	9	1105.56	114.78	0	0	0	0	0	0	10002000	10117000	0
DEGIDLLK	8	901.476	77.058	47453000	53142000	26926000	37875000	0	0	92656000	138770000	0
DEGIDLLKDK	10	1144.6	97.857	130030000	136090000	105720000	100500000	23800000	48641000	137120000	146770000	125420000
DEGIDLLKDKQALQR	15	1740.94	91.207	0	0	61101000	0	40280000	0	0	0	0
[truncated: 15,108 more rows]
